# Supplementary material for: Iron oxide inclusions and exsolution textures of rainbow lattice sunstone
Source: Copernicus journal article supplement (doi:10.5194/ejm-34-183-2022), 2022-03-28
Supplement: Supplementary file 1 [file ejm-34-183-2022-supplement.zip]

Archive with 3 entries (3 files):
- supplementary material.pdf
- all.cif
- ejm-34-183-2022-supplement-title-page.pdf
