# Supplementary material for: Iron oxide inclusions and exsolution textures of rainbow lattice sunstone
Source: Copernicus journal article supplement (doi:10.5194/ejm-34-183-2022), 2022-03-28
Supplement: Supplementary file 1 [file ejm-34-183-2022-supplement.zip › all.cif]

#===============================================================================
data_orthoclase_matrix
#===============================================================================

# 1. CHEMICAL DATA

_chemical_name_mineral                   orthoclase
_chemical_formula_sum                    
'K0.87 Na0.12 Ca0.002 Ba0.008 Al1.01 Si2.99 O8'
_chemical_formula_weight                 277.2
_chemical_compound_source                'Harts Range, Australia'

#===============================================================================

# 2. CRYSTAL DATA

_symmetry_cell_setting                   monoclinic
_symmetry_space_group_name_H-M           'C 1 2/m 1'
_symmetry_space_group_name_Hall          '-C 2y'
_symmetry_Int_Tables_number              12

loop_
 _space_group_symop_id
 _space_group_symop_operation_xyz
 1   x,y,z
 2   -x,y,-z
 3   -x,-y,-z
 4   x,-y,z
 5   x+1/2,y+1/2,z
 6   -x+1/2,y+1/2,-z
 7   -x+1/2,-y+1/2,-z
 8   x+1/2,-y+1/2,z

_cell_length_a                           8.5545(3)
_cell_length_b                           12.9898(3)
_cell_length_c                           7.2118(3)
_cell_angle_alpha                        90
_cell_angle_beta                         116.069(3)
_cell_angle_gamma                        90
_cell_volume                             719.85(5)
_cell_formula_units_Z                    4
_cell_measurement_reflns_used            3102
_cell_measurement_theta_min              3.09
_cell_measurement_theta_max              28.78
_cell_measurement_temperature            100
_cell_special_details
;
The unit cell is indexed and refined with the other phases using CrysAlis Pro,
which allows for simultaneous indexing and refinemnet of multiple domains.
The peaks were integrated in APEX3 by ignoring all the other domains.
;
_exptl_crystal_description               block
_exptl_crystal_density_diffrn            2.5575
_exptl_crystal_F_000                     549
_exptl_absorpt_coefficient_mu            1.348

#===============================================================================

# 3. EXPERIMENTAL DATA

_diffrn_ambient_temperature              100
_diffrn_source                           'Mo microfocus Rotating Anode'
_diffrn_source_power                     2.5
_diffrn_source_voltage                   50
_diffrn_source_current                   50
_diffrn_radiation_type                   'Mo K\a'
_diffrn_radiation_wavelength             0.71073
_diffrn_radiation_monochromator          graphite
_diffrn_measurement_device               'four-circle diffractometer'
_diffrn_measurement_device_type          'Bruker CCD'
_diffrn_detector                         'APEX II'
_diffrn_detector_area_resol_mean         16.67
_diffrn_measurement_method               '5\w and 1\f scans'
_diffrn_measurement_specimen_support     'MiTeGen MicroMount 50'
_diffrn_reflns_number                    3102
_diffrn_reflns_theta_min                 3.09
_diffrn_reflns_theta_max                 28.78
_diffrn_reflns_theta_full                28.11
_diffrn_measured_fraction_theta_max      0.95
_diffrn_measured_fraction_theta_full     0.98
_diffrn_reflns_av_R_equivalents          0.0189
_diffrn_reflns_av_unetI/netI             0.0094
_diffrn_reflns_limit_h_min               -11
_diffrn_reflns_limit_h_max               11
_diffrn_reflns_limit_k_min               -16
_diffrn_reflns_limit_k_max               17
_diffrn_reflns_limit_l_min               -9
_diffrn_reflns_limit_l_max               9
_diffrn_radiation_probe                  X-ray

#===============================================================================

# 4. REFINEMENT DATA

_refine_special_details
;
The Ca and Ba occupancies in the M site were fixed at 0.002 and 0.008 
respectively, which result in a composition closest to the EPMA results. 
The Al occupancies of the tetrahedral sites are calculated following equation:
Occ_Al=0.25(1+n_An)+(<T_i-O>-<<T-O>>)/0.12 (Kroll and Ribbe 1983).
;
_reflns_number_total                     924
_reflns_number_gt                        893
_reflns_threshold_expression             'I>3\s(I)'
_refine_ls_structure_factor_coef         Fsqd
_refine_ls_R_factor_gt                   0.0215
_refine_ls_wR_factor_gt                  0.0867
_refine_ls_R_factor_all                  0.0221
_refine_ls_wR_factor_ref                 0.0868
_refine_ls_goodness_of_fit_ref           3.39
_refine_ls_goodness_of_fit_gt            3.45
_refine_ls_number_reflns                 924
_refine_ls_number_parameters             64
_refine_ls_number_restraints             0
_refine_ls_number_constraints            39
_refine_ls_weighting_scheme              sigma
_refine_ls_weighting_details             'w=1/(\s^2^(I)+0.0004I^2^)'
_refine_ls_shift/su_max                  0.0102
_refine_ls_shift/su_mean                 0.0032
_refine_diff_density_max                 0.39
_refine_diff_density_min                 -0.30
_refine_ls_extinction_method             'none'

loop_
 _atom_type_symbol
 _atom_type_scat_dispersion_real
 _atom_type_scat_dispersion_imag
 _atom_type_scat_source
 Al   0.0645  0.0514
 'International Tables Vol C tables 4.2.6.8 and 6.1.1.1'
 Ba  -0.3244  2.2819
 'International Tables Vol C tables 4.2.6.8 and 6.1.1.1'
 Ca   0.2262  0.3064
 'International Tables Vol C tables 4.2.6.8 and 6.1.1.1'
 K    0.2009  0.2494
 'International Tables Vol C tables 4.2.6.8 and 6.1.1.1'
 Na   0.0362  0.0249
 'International Tables Vol C tables 4.2.6.8 and 6.1.1.1'
 O    0.0106  0.0060
 'International Tables Vol C tables 4.2.6.8 and 6.1.1.1'
 Si   0.0817  0.0704
 'International Tables Vol C tables 4.2.6.8 and 6.1.1.1'

#===============================================================================

# 5. ATOMIC COORDINATES AND DISPLACEMENT PARAMETERS

loop_
 _atom_site_label
 _atom_site_type_symbol
 _atom_site_fract_x
 _atom_site_fract_y
 _atom_site_fract_z
 _atom_site_adp_type
 _atom_site_U_iso_or_equiv
 _atom_site_site_symmetry_multiplicity
 _atom_site_occupancy
 _atom_site_calc_flag
 _atom_site_refinement_flags
 _atom_site_disorder_assembly
 _atom_site_disorder_group
  Mk K 0.28205(7) 0 0.13680(9) Uani 0.0168(3) 4 0.870(9) d . . .
  Mna Na 0.28205(7) 0 0.13680(9) Uani 0.0168(3) 4 0.120(9) d . . .
  Mca Ca 0.28205(7) 0 0.13680(9) Uani 0.0168(3) 4 0.002 d . . .
  Mba Ba 0.28205(7) 0 0.13680(9) Uani 0.0168(3) 4 0.008 d . . .
  T1si Si 0.00913(6) 0.18362(4) 0.22433(7) Uani 0.0101(2) 8 0.5906 d . . .
  T1al Al 0.00913(6) 0.18362(4) 0.22433(7) Uani 0.0101(2) 8 0.4093 d . . .
  T2si Si 0.29355(6) 0.11741(4) -0.34423(7) Uani 0.0096(2) 8 0.9043 d . . .
  T2al Al 0.29355(6) 0.11741(4) -0.34423(7) Uani 0.0096(2) 8 0.0956 d . . .
  Oa1 O 0 0.14431(14) 0 Uani 0.0164(7) 4 1 d . . .
  Oa2 O 0.6326(2) 0 0.2858(3) Uani 0.0167(7) 4 1 d . . .
  Ob O 0.17441(17) 0.14394(11) -0.2272(2) Uani 0.0184(5) 8 1 d . . .
  Oc O 0.46720(16) 0.18931(9) -0.25858(19) Uani 0.0148(5) 8 1 d . . .
  Od O 0.18286(16) 0.12536(9) 0.40793(18) Uani 0.0137(4) 8 1 d . . .

loop_
 _atom_site_aniso_label
 _atom_site_aniso_type_symbol
 _atom_site_aniso_U_11
 _atom_site_aniso_U_22
 _atom_site_aniso_U_33
 _atom_site_aniso_U_12
 _atom_site_aniso_U_13
 _atom_site_aniso_U_23
 Mk K 0.0132(4) 0.0202(4) 0.0142(4) 0 0.0036(2) 0
 Mna Na 0.0132(4) 0.0202(4) 0.0142(4) 0 0.0036(2) 0
 Mca Ca 0.0132(4) 0.0202(4) 0.0142(4) 0 0.0036(2) 0
 Mba Ba 0.0132(4) 0.0202(4) 0.0142(4) 0 0.0036(2) 0
 T1si Si 0.0126(3) 0.0096(3) 0.0087(3) -0.00151(17) 0.0051(2) -0.00119(17)
 T1al Al 0.0126(3) 0.0096(3) 0.0087(3) -0.00151(17) 0.0051(2) -0.00119(17)
 T2si Si 0.0118(3) 0.0081(3) 0.0088(3) -0.00047(16) 0.0045(2) -0.00059(16)
 T2al Al 0.0118(3) 0.0081(3) 0.0088(3) -0.00047(16) 0.0045(2) -0.00059(16)
 Oa1 O 0.0196(9) 0.0129(9) 0.0177(9) 0 0.0091(7) 0
 Oa2 O 0.0198(9) 0.0098(9) 0.0153(9) 0 0.0028(7) 0
 Ob O 0.0198(7) 0.0218(7) 0.0177(7) -0.0008(5) 0.0120(5) -0.0035(5)
 Oc O 0.0150(6) 0.0143(7) 0.0132(6) -0.0013(5) 0.0046(5) -0.0018(5)
 Od O 0.0171(6) 0.0122(6) 0.0092(6) -0.0006(5) 0.0034(5) 0.0006(4)

#===============================================================================

# 6. MOLECULAR GEOMETRY

loop_
 _geom_bond_atom_site_label_1
 _geom_bond_atom_site_label_2
 _geom_bond_site_symmetry_1
 _geom_bond_site_symmetry_2
 _geom_bond_distance
 _geom_bond_publ_flag
  T1si Oa1 . .     1.6652(8)  y
  T1si Ob  . 2_555 1.6613(17) y
  T1si Oc  . 7_555 1.6681(13) y
  T1si Od  . .     1.6749(11) y
  T2si Oa2 . 2_655 1.6336(7)  y
  T2si Ob  . .     1.6203(19) y
  T2si Oc  . .     1.6291(13) y
  T2si Od  . 1_554 1.6169(12) y

loop_
 _geom_angle_atom_site_label_1
 _geom_angle_atom_site_label_2
 _geom_angle_atom_site_label_3
 _geom_angle_site_symmetry_1
 _geom_angle_site_symmetry_2
 _geom_angle_site_symmetry_3
 _geom_angle
 _geom_angle_publ_flag
  Oa1  T1si Ob      . . 2_555 106.02(6)  n
  Oa1  T1si Oc      . . 7_555 113.46(8)  n
  Oa1  T1si Od      . . .     106.02(7)  n
  Ob   T1si Oc  2_555 . 7_555 111.04(8)  n
  Ob   T1si Od  2_555 . .     111.41(7)  n
  Oc   T1si Od  7_555 . .     108.80(6)  n
  Oa2  T2si Ob  2_655 . .     108.96(10) n
  Oa2  T2si Oc  2_655 . .     104.63(8)  n
  Oa2  T2si Od  2_655 . 1_554 108.47(8)  n
  Ob   T2si Oc      . . .     110.98(8)  n
  Ob   T2si Od      . . 1_554 111.43(7)  n
  Oc   T2si Od      . . 1_554 112.08(8)  n
  T1si Oa1 T1si     . . 2_555 144.29(12) n
  T2si Oa2 T2si 2_655 . 3_655 138.01(11) n
  T1si Ob  T2si 2_555 . .     152.46(9)  n
  T1si Oc  T2si 7_555 . .     130.89(9)  n
  T1si Od  T2si     . . 1_556 141.99(10) n

#===============================================================================

# 7. STRUCTURE-FACTOR LIST

loop_
 _refln_index_h
 _refln_index_k
 _refln_index_l
 _refln_F_squared_calc
 _refln_F_squared_meas
 _refln_F_squared_sigma
 _refln_observed_status
   2   0   0  1525.57  1629.34    13.91 o
   4   0   0 17577.50 17777.30   145.43 o
   6   0   0  8783.10  8815.47   100.99 o
   8   0   0     2.64   135.10     7.18 o
   1   1   0   287.53   280.53     2.24 o
   3   1   0  3799.69  3531.13    20.65 o
   5   1   0   226.15   216.80     2.69 o
   7   1   0  4791.86  4756.49    30.97 o
   9   1   0   940.95   935.41    11.22 o
   0   2   0   599.18   615.38     6.73 o
   2   2   0 22511.70 23603.40   147.67 o
   4   2   0  1791.35  1827.73    11.22 o
   6   2   0  2498.80  2466.45    16.16 o
   8   2   0   309.85   329.91     5.39 o
  10   2   0    14.13     8.08     5.84 <
   1   3   0 12540.00 13053.10    83.94 o
   3   3   0   366.84   581.71     4.94 o
   5   3   0  4767.25  4861.08    27.83 o
   7   3   0  2161.73  2125.32    16.16 o
   9   3   0   760.93   780.55     9.87 o
   0   4   0 14943.50 17637.20   181.34 o
   2   4   0  1602.38  1732.12    12.12 o
   4   4   0   431.23   445.26     4.04 o
   6   4   0  2741.76  2646.89    17.95 o
   8   4   0  1285.75  1294.49    12.57 o
   1   5   0     5.29    90.22     1.35 o
   3   5   0  2532.53  2565.19    17.95 o
   5   5   0  1431.31  1486.60    11.67 o
   7   5   0   225.61   226.67     4.04 o
   9   5   0   614.94   430.45    10.32 o
   0   6   0 27239.30 29687.60   306.12 o
   2   6   0  2123.34  2208.81    15.26 o
   4   6   0  3731.46  3646.48    26.03 o
   6   6   0  1853.00  1803.04    12.57 o
   8   6   0   918.43   953.36    10.32 o
   1   7   0   185.36   257.19     2.69 o
   3   7   0   274.21   235.65     2.69 o
   5   7   0   184.87   175.95     2.69 o
   7   7   0   945.53   903.09     8.53 o
   9   7   0  1515.20  1575.03    24.69 o
   0   8   0  5543.61  5616.05    44.44 o
   2   8   0 31263.00 31073.20   207.82 o
   4   8   0   823.01   755.42     7.18 o
   6   8   0   494.02   526.06     6.28 o
   8   8   0  2377.18  2360.97    25.14 o
   1   9   0  2908.25  2892.41    23.34 o
   3   9   0   653.93   602.81     6.28 o
   5   9   0  5194.86  5125.00    39.50 o
   7   9   0   599.48   629.29     8.08 o
   0  10   0  6358.47  6068.94    66.43 o
   2  10   0    42.47    49.82     1.80 o
   4  10   0  2038.24  1989.32    18.85 o
   6  10   0     1.36     3.14     1.35 <
   8  10   0    80.66    51.62     7.18 o
   1  11   0    11.09    25.14     1.80 o
   3  11   0  3489.10  3343.95    29.62 o
   5  11   0    22.91    32.77     2.24 o
   7  11   0   630.93   650.39    11.22 o
   0  12   0   258.48   252.70     6.28 o
   2  12   0   988.80  1059.74    11.22 o
   4  12   0     5.28     8.08     1.35 o
   6  12   0    76.25    77.20     3.59 o
   1  13   0   101.59   107.28     3.14 o
   3  13   0   555.17   586.65     8.08 o
   5  13   0    20.00    25.14     2.24 o
   0  14   0   470.94   507.65     9.87 o
   2  14   0  1249.79  1281.03    13.91 o
   4  14   0  1058.95  1038.65    12.12 o
   1  15   0    18.45    34.11     2.24 o
   3  15   0     5.85    14.81     1.80 o
   5  15   0     3.38     4.94     2.69 <
   0  16   0  7749.87  7818.57    92.91 o
   2  16   0    29.63    31.42     2.24 o
 -10   0   1   520.61   544.01    13.02 o
  -8   0   1  2585.58  2588.98    24.69 o
  -6   0   1  2161.51  2165.72    20.20 o
  -4   0   1  4337.42  5005.61    38.15 o
  -2   0   1 16735.60 17850.40   151.71 o
   0   0   1   341.44   298.04     3.59 o
   2   0   1   106.15   130.62     1.80 o
   4   0   1   101.48    97.85     1.80 o
   6   0   1  2274.36  2101.08    27.83 o
   8   0   1   127.15   119.39     4.94 o
  -9   1   1   194.41   191.66     4.49 o
  -7   1   1     1.35     1.35     0.45 o
  -5   1   1   672.25   647.25     5.39 o
  -3   1   1   193.81   201.09     1.80 o
  -1   1   1   570.42   551.64     4.04 o
   1   1   1  3304.54  3361.01    21.10 o
   3   1   1  1791.69  2053.95    12.12 o
   5   1   1   317.10   321.83     3.14 o
   7   1   1   383.46   376.14     5.39 o
   9   1   1    25.05    21.54     2.24 o
 -10   2   1   619.00   605.50    10.32 o
  -8   2   1    50.44    56.56     1.80 o
  -6   2   1  4891.80  4892.05    28.28 o
  -4   2   1    53.97    88.42     0.90 o
  -2   2   1  1957.64  1954.75    11.67 o
   0   2   1   199.68   222.63     1.80 o
   2   2   1  1398.14  1487.95     9.87 o
   4   2   1   672.28   668.34     4.49 o
   6   2   1   954.33   931.82     8.98 o
   8   2   1    19.59    22.44     1.80 o
  -9   3   1  3296.63  3359.22    25.14 o
  -7   3   1  1030.78   974.91     8.08 o
  -5   3   1   651.85   612.23     4.49 o
  -3   3   1  5626.88  5829.25    31.42 o
  -1   3   1  2900.30  2992.05    17.51 o
   1   3   1 15958.80 16864.30    90.67 o
   3   3   1  1593.91  1378.43     9.43 o
   5   3   1  4254.47  4310.33    26.03 o
   7   3   1    33.97    36.36     2.24 o
   9   3   1    19.08    21.99     2.69 o
 -10   4   1    10.63    16.61     2.69 o
  -8   4   1   376.31   373.89     4.49 o
  -6   4   1  6057.13  6009.69    36.36 o
  -4   4   1  5944.48  5801.87    31.87 o
  -2   4   1 14804.60 14786.60    95.61 o
   0   4   1  7407.11  7560.03    45.78 o
   2   4   1  6728.94  7283.99    40.85 o
   4   4   1   991.46   986.13     7.63 o
   6   4   1  3836.59  3798.19    30.07 o
   8   4   1  4280.19  4308.09    37.70 o
  -9   5   1  1741.83  1765.34    14.81 o
  -7   5   1  2113.27  2095.69    15.26 o
  -5   5   1     6.03     4.94     0.90 o
  -3   5   1  2478.28  2750.12    16.61 o
  -1   5   1  4239.95  4068.85    26.93 o
   1   5   1  2809.66  2470.04    13.91 o
   3   5   1  8306.26  8287.62    54.76 o
   5   5   1  2429.96  2398.22    17.06 o
   7   5   1   821.81   829.03     8.98 o
   9   5   1     2.50     5.84     3.59 <
 -10   6   1   589.36   616.72    28.28 o
  -8   6   1  1810.03  1818.75    15.71 o
  -6   6   1   135.01   132.86     2.24 o
  -4   6   1 10961.00 11097.90    72.71 o
  -2   6   1   547.75   459.62     4.04 o
   0   6   1  3395.39  3418.91    19.30 o
   2   6   1   102.36    97.85     1.35 o
   4   6   1   664.76   646.35     5.84 o
   6   6   1   412.11   430.45     4.49 o
   8   6   1  1169.71  1175.99    13.02 o
  -9   7   1    12.64    12.57     2.24 o
  -7   7   1    30.52    32.77     1.80 o
  -5   7   1   635.61   614.03     6.28 o
  -3   7   1   191.95   210.96     2.24 o
  -1   7   1    86.75   116.25     1.80 o
   1   7   1   566.57   645.90     4.49 o
   3   7   1   759.57   723.10     6.28 o
   5   7   1   973.21   913.42     8.53 o
   7   7   1   309.25   317.79     5.39 o
  -8   8   1   256.90   266.17     4.49 o
  -6   8   1  1158.26  1100.59    10.77 o
  -4   8   1  2044.25  2102.88    17.06 o
  -2   8   1   779.66   838.91     6.28 o
   0   8   1  1049.86  1159.84     9.87 o
   2   8   1    68.77    74.06     1.35 o
   4   8   1  2157.96  2088.96    16.61 o
   6   8   1     7.68    13.91     1.35 o
   8   8   1  1420.10  1464.16    19.75 o
  -9   9   1     0.20     1.80     2.24 <
  -7   9   1   212.16   210.51     3.59 o
  -5   9   1    41.25    42.64     1.80 o
  -3   9   1    78.68    68.67     1.80 o
  -1   9   1   550.64   577.67     6.28 o
   1   9   1    34.51    36.36     1.80 o
   3   9   1    27.52    36.81     1.35 o
   5   9   1    20.78    18.85     1.35 o
   7   9   1     2.03     1.80     1.35 <
  -8  10   1   587.31   585.75     9.43 o
  -6  10   1     3.20     5.84     1.35 o
  -4  10   1     0.62     1.80     0.90 <
  -2  10   1   594.57   574.98     6.28 o
   0  10   1    31.07    40.85     1.35 o
   2  10   1  1701.85  1618.11    15.26 o
   4  10   1    34.95    43.54     2.24 o
   6  10   1   339.96   331.70     5.84 o
  -7  11   1   570.00   564.66     8.53 o
  -5  11   1     0.75     4.04     1.35 <
  -3  11   1   497.61   495.53     6.73 o
  -1  11   1   767.00   794.92     8.08 o
   1  11   1   698.23   708.74     8.08 o
   3  11   1   922.13   954.71    10.32 o
   5  11   1   509.42   498.68     7.18 o
   7  11   1    58.19    51.17     8.08 o
  -6  12   1  1338.50  1357.33    15.26 o
  -4  12   1  3790.67  3892.90    34.56 o
  -2  12   1  3327.36  3342.61    26.93 o
   0  12   1  2387.79  2383.41    21.99 o
   2  12   1   358.63   373.45     5.39 o
   4  12   1   464.10   473.54     6.73 o
   6  12   1  1657.21  1577.27    22.44 o
  -7  13   1   625.41   598.32    14.81 o
  -5  13   1    15.74    19.30     1.80 o
  -3  13   1   376.43   397.23     6.28 o
  -1  13   1   749.17   750.03     8.53 o
   1  13   1  1318.03  1344.31    13.91 o
   3  13   1  1896.13  1878.90    17.95 o
   5  13   1  2111.09  2114.55    27.83 o
  -6  14   1  2106.02  2106.02    29.18 o
  -4  14   1  1277.32  1276.99    14.36 o
  -2  14   1  2016.00  2041.38    19.75 o
   0  14   1   697.17   710.09     8.08 o
   2  14   1     4.89     4.04     1.35 <
   4  14   1    26.04    30.52     3.14 o
  -5  15   1    16.24    15.71     2.69 o
  -3  15   1    11.27    19.30     2.24 o
  -1  15   1    22.14    29.62     2.24 o
   1  15   1    17.33    22.44     1.80 o
   3  15   1   776.42   800.30    13.91 o
  -2  16   1  1141.08  1104.63    14.81 o
   0  16   1   130.50   131.07     4.49 o
   2  16   1   166.08   177.30     6.28 o
 -10   0   2  1365.89  1420.62    19.75 o
  -8   0   2  1368.22  1431.84    15.26 o
  -6   0   2 22299.80 21801.20   162.49 o
  -4   0   2  5855.51  6470.66    48.92 o
  -2   0   2 27287.90 28614.40   227.12 o
   0   0   2 37202.50 39615.80   394.54 o
   2   0   2  2804.65  3124.02    25.14 o
   4   0   2 23196.00 22708.80   230.71 o
   6   0   2   524.65   537.73    10.32 o
   8   0   2  3021.26  3032.45    33.22 o
 -11   1   2   222.34   238.79     8.53 o
  -9   1   2    44.95    49.82     1.80 o
  -7   1   2   873.33   834.42     6.73 o
  -5   1   2  1860.24  1826.83    10.77 o
  -3   1   2  6897.11  6456.30    35.46 o
  -1   1   2 10464.10 11045.80    72.27 o
   1   1   2  3771.18  3272.14    21.10 o
   3   1   2   654.70   646.80     4.49 o
   5   1   2   764.49   734.77     8.53 o
   7   1   2   201.36   198.84     3.59 o
   9   1   2   171.05   180.89     9.87 o
 -10   2   2   139.98   153.51     4.04 o
  -8   2   2  1418.51  1412.99    10.77 o
  -6   2   2    35.76    30.07     0.90 o
  -4   2   2  9280.13  9470.80    50.27 o
  -2   2   2  2329.62  2378.02    15.71 o
   0   2   2  3212.83  3279.77    18.85 o
   2   2   2  8715.40  8980.65    56.56 o
   4   2   2   358.62   348.76     4.04 o
   6   2   2  2876.20  2971.41    24.69 o
   8   2   2    80.55    82.14     4.04 o
  -9   3   2   256.23   255.40     4.04 o
  -7   3   2  1420.03  1404.91    10.32 o
  -5   3   2    52.26    47.58     0.90 o
  -3   3   2  1331.47  1757.71    10.32 o
  -1   3   2  7079.92  7339.64    39.50 o
   1   3   2   239.06   368.96     2.69 o
   3   3   2   268.21   239.69     2.69 o
   5   3   2   658.70   657.12     6.73 o
   7   3   2  1483.80  1473.14    15.26 o
 -10   4   2    98.72   109.52     3.14 o
  -8   4   2   566.96   590.24     5.84 o
  -6   4   2  1596.09  1551.68    10.32 o
  -4   4   2  2915.17  3017.19    17.06 o
  -2   4   2    35.26    32.32     0.90 o
   0   4   2    32.54    24.69     0.90 o
   2   4   2  4011.41  4167.15    22.89 o
   4   4   2  2442.09  2365.46    17.95 o
   6   4   2   457.80   443.02     5.84 o
   8   4   2   133.49   132.86     4.49 o
  -9   5   2   132.59   136.45     2.69 o
  -7   5   2   252.09   263.93     3.14 o
  -5   5   2  2857.07  2906.77    17.51 o
  -3   5   2   528.56   489.25     4.49 o
  -1   5   2    12.15    39.50     0.90 o
   1   5   2  1648.22  1557.97     8.98 o
   3   5   2   797.32   823.20     6.73 o
   5   5   2  2206.55  2286.46    17.95 o
   7   5   2   104.80   105.93     3.14 o
 -10   6   2   264.48   268.86     6.73 o
  -8   6   2    46.11    50.27     2.24 o
  -6   6   2  2468.55  2303.51    15.26 o
  -4   6   2   114.48   109.97     1.80 o
  -2   6   2  3851.78  3885.27    30.07 o
   0   6   2  8475.77  8768.79    45.78 o
   2   6   2   729.94   719.06     5.39 o
   4   6   2  1642.72  1551.68    12.57 o
   6   6   2   623.16   625.25     7.18 o
   8   6   2   804.89   844.74    17.06 o
  -9   7   2   327.26   365.82     5.84 o
  -7   7   2    48.58    50.27     1.80 o
  -5   7   2  1596.77  1584.45    13.47 o
  -3   7   2   557.82   513.04     5.39 o
  -1   7   2  3412.18  3237.13    20.65 o
   1   7   2   446.08   419.23     3.59 o
   3   7   2  1626.98  1645.49    12.12 o
   5   7   2    43.25    44.44     1.80 o
   7   7   2   219.03   237.89     4.94 o
  -8   8   2  4675.64  4694.10    33.22 o
  -6   8   2   703.21   667.00     7.63 o
  -4   8   2 22078.00 21589.80   135.55 o
  -2   8   2  1555.85  1576.37    12.57 o
   0   8   2  2008.87  1967.77    13.91 o
   2   8   2 22818.20 22313.40   134.66 o
   4   8   2   229.42   207.37     3.14 o
   6   8   2  7661.52  7695.14    57.00 o
  -9   9   2     5.05     8.53     1.80 o
  -7   9   2     1.38     1.80     0.90 <
  -5   9   2  3556.49  3602.05    28.28 o
  -3   9   2  4158.12  3995.24    30.52 o
  -1   9   2 10781.80 10687.60    72.27 o
   1   9   2   738.80   714.13     6.28 o
   3   9   2  1044.80  1064.23     9.43 o
   5   9   2   240.72   222.63     3.59 o
   7   9   2    32.23    48.92     6.28 o
  -8  10   2    32.66    33.66     2.24 o
  -6  10   2  2425.61  2330.89    20.20 o
  -4  10   2    76.54    85.73     2.24 o
  -2  10   2  4235.37  3983.57    30.52 o
   0  10   2  2962.08  2716.46    19.75 o
   2  10   2   289.45   307.46     4.49 o
   4  10   2  3732.67  3591.27    31.42 o
   6  10   2   138.26   148.12     4.49 o
  -7  11   2   246.04   268.86     4.94 o
  -5  11   2   969.66   937.65    10.77 o
  -3  11   2  3377.13  3257.77    26.48 o
   1  11   2  3106.79  2989.81    24.24 o
   3  11   2  1036.03  1004.98    13.02 o
   5  11   2  1020.87  1066.47    14.36 o
  -8  12   2   155.99   162.93     7.18 o
  -6  12   2    92.18    87.98     3.14 o
  -4  12   2   599.00   623.01     8.08 o
  -2  12   2     5.27     4.04     0.90 o
   0  12   2   136.59   150.37     3.14 o
   2  12   2   929.34   996.45    10.32 o
   4  12   2   430.02   399.93     7.63 o
  -7  13   2   391.15   384.67     9.87 o
  -5  13   2    13.36    12.57     1.80 o
  -3  13   2  1759.36  1735.71    17.51 o
  -1  13   2    47.52    57.90     2.24 o
   1  13   2   540.57   551.19     7.63 o
   3  13   2   680.06   684.95    10.32 o
   5  13   2    18.64    16.16     4.49 o
  -6  14   2   572.51   550.29     9.43 o
  -4  14   2  1741.03  1752.32    17.95 o
  -2  14   2  1651.10  1642.35    17.06 o
   0  14   2  1155.87  1186.32    12.57 o
   2  14   2  1676.78  1633.82    16.61 o
   4  14   2  1800.34  1785.54    41.74 o
  -5  15   2   212.42   215.45     7.18 o
  -3  15   2    74.49    92.01     3.59 o
  -1  15   2   521.63   571.39     8.08 o
   1  15   2     0.54     5.39     1.80 o
  -4  16   2    16.70    17.51     4.49 o
  -2  16   2  2949.00  2885.23    39.95 o
   0  16   2  2002.80  1952.96    23.34 o
  -1  17   2   659.20   702.90    26.03 o
 -10   0   3  1341.93  1421.07    17.95 o
  -8   0   3  1788.35  1865.43    18.85 o
  -6   0   3   318.79   331.70     4.49 o
  -4   0   3 10801.00 11655.80    97.85 o
  -2   0   3    33.85    10.77     0.90 o
   0   0   3   597.67   670.14     8.08 o
   2   0   3  1521.18  1505.90    17.51 o
   4   0   3  1895.42  1690.83    22.44 o
   6   0   3   109.29    96.50     4.04 o
   8   0   3    80.75    85.28     6.73 o
 -11   1   3   130.55   130.17     4.94 o
  -9   1   3    38.25    46.23     1.80 o
  -7   1   3   250.79   231.16     2.69 o
  -5   1   3  1273.80  1264.87     8.53 o
  -3   1   3   219.54   263.93     2.24 o
  -1   1   3  2963.56  3593.07    23.79 o
   1   1   3  6477.21  6830.20    44.44 o
   3   1   3   689.94   661.61     5.84 o
   5   1   3    20.15    24.24     1.35 o
   7   1   3    61.06    66.43     2.69 o
 -10   2   3    72.25    71.37     2.69 o
  -8   2   3  1648.63  1685.89    12.12 o
  -6   2   3  1839.03  1901.79    11.22 o
  -4   2   3   940.65  1023.38     6.73 o
  -2   2   3   667.34   627.50     4.49 o
   0   2   3    24.82    27.38     0.90 o
   2   2   3  2051.23  2109.61    15.26 o
   4   2   3  1740.34  1691.28    13.91 o
   6   2   3    79.18    82.59     2.69 o
 -11   3   3   185.35   211.86     6.28 o
  -9   3   3  2099.18  2184.12    17.06 o
  -7   3   3  4976.89  4827.41    29.18 o
  -5   3   3 10809.70 10437.60    55.66 o
  -3   3   3  2235.79  2251.90    13.02 o
  -1   3   3   484.74   343.82     2.69 o
   1   3   3  1516.38  1651.33    10.32 o
   3   3   3   137.42   127.47     2.24 o
   5   3   3  1880.94  1906.73    16.61 o
   7   3   3   134.92   136.00     3.59 o
 -10   4   3  1212.64  1246.46    12.57 o
  -8   4   3   839.53   874.37     8.08 o
  -6   4   3   807.29   824.54     6.28 o
  -4   4   3    59.77    71.82     1.35 o
  -2   4   3    30.62    67.33     1.35 o
   0   4   3  8412.01  8464.47    48.48 o
   2   4   3 14174.90 14265.40    95.61 o
   4   4   3  9681.67  9441.62    65.98 o
   6   4   3   649.93   627.95     7.18 o
 -11   5   3   182.18   216.80    15.71 o
  -9   5   3   455.27   445.26     6.73 o
  -7   5   3  8285.15  8350.91    49.37 o
  -5   5   3  4488.87  4317.07    28.28 o
  -3   5   3  6729.05  6454.95    43.99 o
  -1   5   3     0.70     4.94     0.45 o
   1   5   3  1188.84  1214.60     8.53 o
   3   5   3  3386.64  3417.12    24.69 o
   5   5   3   442.55   429.55     5.84 o
   7   5   3  1924.92  1880.25    20.20 o
 -10   6   3  2753.46  2773.01    29.62 o
  -8   6   3     0.80     0.90     0.90 <
  -6   6   3  1235.40  1230.31     9.43 o
  -4   6   3  3519.49  3680.59    26.48 o
  -2   6   3   305.20   281.43     2.69 o
   0   6   3  2998.13  2933.25    17.95 o
   2   6   3  2003.24  1925.58    13.91 o
   4   6   3   547.32   577.22     6.28 o
   6   6   3   308.46   290.86     4.94 o
  -9   7   3    57.25    60.15     2.69 o
  -7   7   3   277.83   268.86     3.59 o
  -5   7   3   103.19   100.99     2.69 o
  -3   7   3   269.13   284.12     3.59 o
  -1   7   3  4249.16  4240.31    27.38 o
   1   7   3  1367.75  1359.58     8.98 o
   3   7   3  1458.23  1419.27    11.67 o
   5   7   3   578.40   551.19     6.28 o
   7   7   3    33.38    29.18     3.59 o
 -10   8   3   803.01   927.33    26.03 o
  -8   8   3  1259.06  1236.59    12.57 o
  -6   8   3  4933.77  4925.71    32.77 o
  -4   8   3   606.59   620.76     6.28 o
  -2   8   3  1504.41  1460.12    11.67 o
   0   8   3  3021.75  3107.86    20.65 o
   2   8   3   292.20   290.41     3.59 o
   4   8   3   338.88   355.04     4.94 o
   6   8   3    12.50    10.77     1.80 o
  -9   9   3    27.96    32.77     2.69 o
  -7   9   3   509.94   516.18     6.73 o
  -5   9   3    85.44    86.18     2.24 o
  -3   9   3   872.26   873.92     8.08 o
  -1   9   3   378.42   380.18     4.04 o
   1   9   3   349.08   315.99     4.04 o
   3   9   3   819.58   814.22     9.87 o
   5   9   3    59.63    57.45     2.69 o
  -8  10   3  1007.53  1000.04    11.22 o
  -6  10   3   419.90   409.80     5.84 o
  -4  10   3   473.16   441.22     5.39 o
  -2  10   3  2478.56  2391.04    19.30 o
   0  10   3    29.11    35.46     1.35 o
   2  10   3    50.38    45.33     2.24 o
   4  10   3   643.49   636.47     8.53 o
   6  10   3   179.32   197.49    13.02 o
  -7  11   3  3751.50  3650.97    29.62 o
  -5  11   3   341.05   333.50     5.39 o
  -3  11   3  2290.97  2270.75    18.85 o
  -1  11   3   556.49   542.66     6.73 o
   1  11   3   478.09   492.39     6.28 o
   3  11   3  1173.24  1160.28    14.81 o
   5  11   3    21.40    25.14     3.14 o
  -8  12   3   350.25   371.65    15.71 o
  -6  12   3   397.79   410.25     7.18 o
  -4  12   3    79.99   103.24     3.14 o
  -2  12   3   186.12   201.54     3.59 o
   0  12   3  2881.14  2984.87    24.69 o
   2  12   3  3491.41  3460.21    33.66 o
   4  12   3  2568.19  2541.85    34.56 o
  -7  13   3  1032.65  1058.40    21.99 o
  -5  13   3  3359.19  3407.24    31.42 o
  -3  13   3   452.55   465.01     6.28 o
  -1  13   3  2154.63  2132.50    23.34 o
   1  13   3    96.48    92.01     3.59 o
   3  13   3     1.12     3.59     2.24 <
  -6  14   3   508.97   446.61    11.67 o
  -4  14   3    90.68    89.77     3.14 o
  -2  14   3  2998.35  2943.13    30.07 o
   0  14   3   304.11   314.65     5.84 o
   2  14   3  2006.00  2043.18    26.93 o
  -5  15   3    88.67   118.50     5.84 o
  -3  15   3    16.19    26.03     3.14 o
  -1  15   3   476.04   492.39     9.87 o
   1  15   3   462.29   461.42     9.87 o
  -2  16   3   701.30   681.36    16.61 o
   0  16   3     5.10     0.00     3.14 <
 -10   0   4    12.52    20.20     2.69 o
  -8   0   4   496.92   481.17     7.18 o
  -6   0   4  9776.30  9329.41    80.34 o
  -4   0   4   606.47   598.77     6.73 o
  -2   0   4 41840.20 44752.00   355.94 o
   0   0   4   484.73   574.98     6.28 o
   2   0   4 11021.20 10723.50   116.70 o
   4   0   4  1805.36  1815.61    20.20 o
   6   0   4   449.21   428.21     7.63 o
 -11   1   4   578.72   598.77    10.32 o
  -9   1   4  2824.51  2850.22    20.20 o
  -7   1   4  1999.69  2022.08    12.57 o
  -5   1   4  5150.97  5199.51    32.32 o
  -3   1   4    15.58    18.85     0.90 o
  -1   1   4   845.00   968.18     7.63 o
   1   1   4  6251.70  6257.46    43.09 o
   3   1   4  1120.95  1120.79     9.87 o
   5   1   4  3090.43  3088.56    25.58 o
   7   1   4   188.76   184.93     7.18 o
 -10   2   4    52.29    54.76     2.69 o
  -8   2   4   238.75   223.53     3.59 o
  -6   2   4   321.65   299.83     3.14 o
  -4   2   4  7719.27  7752.14    44.44 o
   0   2   4  8323.38  8279.99    56.11 o
   2   2   4   570.70   550.29     5.84 o
   4   2   4  2089.96  2072.35    17.51 o
   6   2   4   348.22   355.04     5.39 o
 -11   3   4   212.02   225.77     7.18 o
  -9   3   4   462.76   456.93     6.28 o
  -7   3   4   755.29   704.25     6.28 o
  -5   3   4   223.89   214.55     2.69 o
  -3   3   4   985.56   921.49     7.18 o
  -1   3   4  1082.73  1053.91     7.63 o
   1   3   4  2478.60  2425.15    17.95 o
   3   3   4   219.27   214.55     3.59 o
   5   3   4   993.38   958.75     9.87 o
 -10   4   4    59.73    66.43     2.69 o
  -8   4   4    15.85    17.06     1.35 o
  -6   4   4   794.82   727.14     7.18 o
  -4   4   4     0.91     1.35     0.45 o
  -2   4   4   540.15   554.78     4.49 o
   0   4   4     0.71     2.24     0.45 o
   2   4   4   243.76   204.68     2.69 o
   4   4   4   785.53   827.68     8.53 o
   6   4   4   332.35   346.96     6.28 o
 -11   5   4   266.64   278.74    14.81 o
  -9   5   4    64.74    67.78     2.69 o
  -7   5   4   751.76   770.23     7.18 o
  -5   5   4   330.02   308.36     4.04 o
  -3   5   4    83.00    83.04     1.35 o
  -1   5   4  1060.85  1069.62     7.63 o
   1   5   4   111.49   133.76     2.24 o
   3   5   4  1904.18  1939.49    16.16 o
   5   5   4   472.08   496.43     6.73 o
 -10   6   4    60.04    56.56     3.59 o
  -8   6   4   253.81   242.38     4.49 o
  -6   6   4  1980.26  1824.59    15.71 o
  -4   6   4   243.81   242.38     3.14 o
  -2   6   4  6064.12  5985.01    38.60 o
   0   6   4  2901.84  2831.36    18.40 o
   2   6   4  2265.66  2200.28    17.06 o
   4   6   4   401.65   393.64     5.39 o
   6   6   4  1589.01  1676.91    21.54 o
  -9   7   4   644.82   607.75     8.08 o
  -7   7   4   866.29   854.62     8.53 o
  -5   7   4  2118.66  1997.84    16.16 o
  -3   7   4    13.85    16.61     0.90 o
  -1   7   4   105.62   110.42     2.24 o
   1   7   4  1928.18  1800.80    13.47 o
   3   7   4   913.10   887.38     8.53 o
   5   7   4   839.69   829.48     9.87 o
  -8   8   4   234.30   231.16     4.49 o
  -6   8   4    13.59    18.85     1.35 o
  -4   8   4 10866.90 10566.00    76.31 o
  -2   8   4   896.83   861.80     7.18 o
   0   8   4 11243.40 10823.60    70.02 o
   2   8   4   158.34   146.77     3.14 o
   4   8   4  1675.04  1722.25    16.61 o
   6   8   4  1172.89  1148.17    29.18 o
  -9   9   4  1617.12  1656.72    20.20 o
  -7   9   4  4422.35  4251.09    30.52 o
  -5   9   4   734.62   730.73     8.98 o
  -3   9   4   113.85   107.72     2.24 o
  -1   9   4  4274.51  4146.95    29.18 o
   1   9   4  1095.13  1079.04     9.43 o
   3   9   4  3063.39  2987.12    25.58 o
   5   9   4   196.21   187.62     6.28 o
  -8  10   4    20.92    21.10     2.69 o
  -6  10   4   375.35   383.77     5.84 o
  -4  10   4   316.81   312.40     4.49 o
  -2  10   4  4938.53  4750.66    35.01 o
   0  10   4   392.79   392.30     5.39 o
   2  10   4  1620.51  1601.51    16.16 o
   4  10   4    33.16    25.58     2.69 o
  -7  11   4     2.75     4.49     1.35 o
  -5  11   4   475.83   460.07     7.18 o
  -3  11   4    33.88    36.81     2.24 o
  -1  11   4    74.59    79.90     2.69 o
   1  11   4   210.14   197.49     4.49 o
   3  11   4   343.06   348.31     6.28 o
  -6  12   4     2.01     2.69     1.35 <
  -4  12   4    29.22    36.81     2.24 o
  -2  12   4     4.41     4.49     1.35 o
   0  12   4   537.84   541.77     8.53 o
   2  12   4     3.50     0.00     1.80 <
  -7  13   4   202.01   176.85    10.32 o
  -5  13   4    10.11    10.32     1.80 o
  -3  13   4   411.33   425.06     6.73 o
  -1  13   4   332.76   324.97     6.73 o
   1  13   4   830.95   862.70    12.57 o
   3  13   4    33.07    27.83     5.84 o
  -6  14   4    90.51   100.99     8.08 o
  -4  14   4   457.22   474.89    10.32 o
  -2  14   4   486.78   482.07     8.98 o
   0  14   4   183.62   220.39     6.28 o
   2  14   4   589.78   565.11    20.20 o
  -3  15   4    13.82    25.58     5.39 o
  -1  15   4   159.96   150.37     5.84 o
   1  15   4    75.85    89.32     5.84 o
 -10   0   5  2635.78  2680.10    29.62 o
  -8   0   5  2019.77  2064.27    20.65 o
  -6   0   5  4602.79  4494.36    40.40 o
  -4   0   5  9429.06  9565.95    76.75 o
  -2   0   5  1196.35  1221.78    15.26 o
   0   0   5  2100.91  1916.15    20.20 o
   2   0   5  1775.91  1909.87    18.85 o
   4   0   5   226.57   220.84     4.94 o
   6   0   5  1060.90  1109.12    34.11 o
 -11   1   5   515.38   551.19    18.40 o
  -9   1   5     0.94     0.90     1.35 <
  -7   1   5   269.41   278.29     3.59 o
  -5   1   5  2845.18  2700.30    17.95 o
  -3   1   5   910.47   964.14     8.08 o
  -1   1   5  2225.01  2188.61    17.51 o
   1   1   5  1500.65  1528.79    13.02 o
   3   1   5    68.34    71.37     2.24 o
   5   1   5   971.83   989.72     9.43 o
 -10   2   5   274.91   288.16     4.94 o
  -8   2   5  2829.72  2804.43    20.20 o
  -6   2   5   733.86   780.55     6.73 o
  -4   2   5  3922.26  3892.90    23.79 o
  -2   2   5     1.85    26.03     1.35 o
   0   2   5  2384.77  2405.85    18.85 o
   2   2   5   185.11   201.54     3.14 o
   4   2   5    46.30    43.54     2.24 o
   6   2   5   158.62   159.79     9.87 o
 -11   3   5  4097.08  4122.27    82.14 o
  -9   3   5    62.15    59.70     2.24 o
  -7   3   5   765.75   759.46     8.08 o
  -5   3   5  7205.72  6905.15    44.89 o
  -3   3   5   204.59   212.31     2.69 o
  -1   3   5 11319.20 11066.00    79.00 o
   1   3   5     1.41     3.59     0.90 o
   3   3   5  3495.63  3449.44    27.83 o
   5   3   5   451.56   479.38     7.63 o
 -10   4   5   230.67   232.51     5.39 o
  -8   4   5  1846.08  1831.32    14.36 o
  -6   4   5  1092.70  1145.47    10.77 o
  -4   4   5  5696.46  5566.23    40.40 o
  -2   4   5  3888.92  3893.35    26.03 o
   0   4   5  2845.20  2624.44    19.30 o
   2   4   5   823.57   884.69     9.43 o
   4   4   5  2099.69  2118.59    19.75 o
  -9   5   5  2701.63  2646.44    21.10 o
  -7   5   5   236.13   257.19     4.49 o
  -5   5   5    83.99    85.28     2.24 o
  -3   5   5  7668.59  7523.22    51.17 o
  -1   5   5  1542.83  1461.47    10.77 o
   1   5   5  9128.45  9049.77    65.08 o
   3   5   5    18.24    17.06     1.35 o
   5   5   5   606.35   591.59     9.87 o
 -10   6   5  2633.10  2648.68    28.73 o
  -8   6   5     0.31     2.24     0.90 <
  -6   6   5  6388.76  6274.96    46.68 o
  -4   6   5   514.79   531.44     5.84 o
  -2   6   5  3255.47  3237.13    21.99 o
   0   6   5   403.77   402.62     4.49 o
   2   6   5   106.61   109.97     2.69 o
   4   6   5   680.61   678.67     8.53 o
  -9   7   5    17.13    18.85     1.80 o
  -7   7   5     0.08     0.45     0.90 <
  -5   7   5   925.72   870.78     8.53 o
  -3   7   5   974.05   999.60     8.53 o
  -1   7   5    12.97    13.02     1.35 o
   1   7   5   550.88   535.03     6.28 o
   3   7   5  1095.25  1078.14    11.67 o
   5   7   5   132.48   149.47     6.28 o
  -8   8   5  1853.04  1825.49    17.06 o
  -6   8   5  2125.28  2216.88    19.75 o
  -4   8   5   634.97   604.16     6.73 o
  -2   8   5  1814.63  1830.87    15.26 o
   0   8   5   569.68   620.76     6.73 o
   2   8   5     0.38     4.04     1.80 <
   4   8   5   475.39   508.10     9.87 o
  -9   9   5   704.58   698.86    16.61 o
  -7   9   5    73.98    74.51     2.69 o
  -5   9   5    30.11    26.48     1.80 o
  -3   9   5  3272.67  3220.07    26.48 o
  -1   9   5   168.33   171.46     3.59 o
   1   9   5   591.24   564.66     7.18 o
   3   9   5   490.49   478.93     8.53 o
  -8  10   5   430.04   435.84     7.63 o
  -6  10   5   138.87   151.71     4.04 o
  -4  10   5   123.38   127.47     3.14 o
  -2  10   5  1204.34  1219.08    11.22 o
   0  10   5   335.46   334.39     5.39 o
   2  10   5    62.93    73.16     3.14 o
  -7  11   5   355.40   354.14     6.28 o
  -5  11   5     8.35     8.98     1.80 o
  -3  11   5  2244.13  2175.14    20.65 o
  -1  11   5    15.57    19.75     1.80 o
   1  11   5  1834.91  1812.47    22.89 o
   3  11   5    49.34    45.78     4.49 o
  -6  12   5  1200.26  1259.03    15.26 o
  -4  12   5   566.88   596.53     8.53 o
  -2  12   5  1617.40  1691.28    17.06 o
   0  12   5   178.00   185.38     6.73 o
   2  12   5    15.34    16.16     4.94 o
  -5  13   5   536.58   530.54    11.22 o
  -3  13   5   445.48   442.12     7.18 o
  -1  13   5  4272.58  4260.06    48.92 o
   1  13   5  1090.55  1057.05    30.07 o
  -4  14   5  1635.76  1703.85    28.28 o
  -2  14   5    23.64    25.14     3.14 o
   0  14   5   174.39   205.57    11.67 o
  -3  15   5    41.96    34.56     5.84 o
 -10   0   6  2602.70  2610.08    35.01 o
  -8   0   6  1951.10  2009.07    28.28 o
  -6   0   6    48.62    86.18     3.14 o
  -4   0   6   204.27   250.91     4.49 o
  -2   0   6  3347.49  3666.23    44.89 o
   0   0   6    71.16    69.12     3.14 o
   2   0   6  3659.43  3810.76    48.03 o
   4   0   6   440.36   459.18    10.32 o
  -9   1   6    25.45    25.14     2.69 o
  -7   1   6  1161.73  1177.79    10.32 o
  -5   1   6  5019.80  5002.02    34.56 o
  -3   1   6  8033.25  7877.82    62.84 o
  -1   1   6  2591.06  2504.60    22.89 o
   1   1   6   179.87   166.52     3.59 o
   3   1   6    14.71    15.26     1.80 o
   5   1   6   590.06   599.22    15.26 o
 -10   2   6   176.31   171.01     4.49 o
  -8   2   6   427.79   434.94     6.28 o
  -6   2   6  1656.24  1613.18    12.57 o
  -4   2   6   125.91   141.39     2.24 o
  -2   2   6   212.79   224.43     4.04 o
   0   2   6  1720.23  1675.12    16.16 o
   2   2   6    25.63    26.03     1.80 o
   4   2   6  1335.65  1407.60    16.16 o
  -9   3   6    75.58    68.23     2.24 o
  -7   3   6    14.43    17.95     1.80 o
  -5   3   6    18.81    22.89     1.35 o
  -3   3   6   642.60   601.46     6.28 o
  -1   3   6   231.56   223.98     4.04 o
   1   3   6   426.25   461.87     6.28 o
   3   3   6   591.08   596.08     7.63 o
 -10   4   6   388.27   383.32     6.73 o
  -8   4   6    42.68    41.29     2.24 o
  -6   4   6   255.79   228.02     4.04 o
  -4   4   6   658.02   584.41     5.84 o
  -2   4   6     0.31     4.04     0.90 o
   0   4   6   124.02   147.22     3.14 o
   2   4   6    86.45   105.93     2.69 o
   4   4   6    54.09    49.37     3.59 o
  -9   5   6     0.94     3.14     1.35 <
  -7   5   6   340.42   358.63     5.39 o
  -5   5   6   334.97   337.54     4.94 o
  -3   5   6   576.90   599.22     5.84 o
  -1   5   6    20.65    17.95     1.35 o
   1   5   6    20.73    30.97     2.24 o
   3   5   6  2148.17  2209.25    23.34 o
 -10   6   6   152.73   137.80     8.53 o
  -8   6   6   134.48   129.27     3.59 o
  -6   6   6     6.88     7.18     1.35 o
  -4   6   6   185.34   199.29     3.14 o
  -2   6   6   550.96   555.23     6.73 o
   0   6   6   969.30   979.85    11.67 o
   2   6   6   179.41   184.93     3.59 o
   4   6   6    60.38    68.67     4.49 o
  -9   7   6   175.00   167.42     4.49 o
  -7   7   6   384.39   394.09     6.28 o
  -5   7   6  2012.00  1992.01    17.06 o
  -3   7   6  4334.56  4122.71    32.77 o
  -1   7   6  1294.51  1238.83    12.12 o
   1   7   6   308.89   309.26     7.18 o
   3   7   6    97.61    89.32     4.04 o
  -8   8   6   556.30   578.57     8.53 o
  -6   8   6  1631.12  1640.56    14.81 o
  -4   8   6   942.69   897.71     8.98 o
  -2   8   6   255.37   263.48     4.94 o
   0   8   6  3269.11  3218.28    32.77 o
   2   8   6     2.26     4.94     1.80 <
  -7   9   6  1398.83  1408.50    15.26 o
  -5   9   6  3613.32  3596.66    28.73 o
  -3   9   6  4113.74  4138.42    33.66 o
  -1   9   6   742.72   703.80     8.98 o
   1   9   6   280.52   280.08     6.28 o
   3   9   6   151.02   148.57     7.18 o
  -8  10   6  1248.43  1137.39    29.62 o
  -6  10   6   282.84   281.88     5.39 o
  -4  10   6   985.45   935.41    10.32 o
  -2  10   6  1295.41  1232.10    13.47 o
   0  10   6    32.02    32.77     2.24 o
   2  10   6  1949.26  1858.25    30.97 o
  -7  11   6     0.22     0.00     4.04 <
  -5  11   6   123.25   125.68     4.04 o
  -3  11   6   137.19   127.03     3.59 o
  -1  11   6    77.59    89.32     3.59 o
  -6  12   6    40.08    39.05     7.18 o
  -4  12   6    50.04    53.86     3.59 o
  -2  12   6     4.97     4.04     2.24 <
  -5  13   6   442.95   420.58    17.95 o
  -3  13   6    80.33    84.38     4.49 o
 -10   0   7  1276.95  1261.28    23.34 o
  -8   0   7  1253.38  1254.99    20.20 o
  -6   0   7  1094.32  1138.29    14.36 o
  -4   0   7  4408.05  4642.04    46.68 o
  -2   0   7   141.79   156.65     4.94 o
   0   0   7   894.72   960.10    15.26 o
   2   0   7   276.64   286.37     8.53 o
  -9   1   7    31.82    34.56     2.69 o
  -7   1   7   584.31   601.46     7.63 o
  -5   1   7    18.63    25.14     1.35 o
  -3   1   7    54.03    73.61     2.24 o
  -1   1   7  1543.52  1625.75    16.16 o
   1   1   7    87.83    90.22     3.14 o
 -10   2   7   981.08   986.58    19.75 o
  -8   2   7   613.39   625.25     8.08 o
  -6   2   7  1236.24  1260.83    10.77 o
  -4   2   7  1058.14  1055.25    10.32 o
  -2   2   7    55.00    69.57     2.24 o
   0   2   7  1857.81  1932.31    18.85 o
   2   2   7    45.46    45.78     2.69 o
  -9   3   7   583.17   574.98     8.53 o
  -7   3   7  3538.01  3575.56    30.07 o
  -5   3   7    59.55    55.21     1.80 o
  -3   3   7  2661.62  2671.57    22.44 o
  -1   3   7   707.49   757.66     8.98 o
   1   3   7   101.05    98.75     3.14 o
 -10   4   7   318.48   347.41    13.47 o
  -8   4   7    49.06    53.86     2.69 o
  -6   4   7   180.46   173.71     3.59 o
  -4   4   7   880.98   893.22     9.43 o
  -2   4   7  3034.45  3038.29    25.14 o
   0   4   7  2926.23  2995.20    30.52 o
   2   4   7  1243.73  1200.68    15.71 o
  -9   5   7  3481.05  3541.90    35.01 o
  -7   5   7   794.81   774.72     8.98 o
  -5   5   7  5420.03  5282.55    47.13 o
  -3   5   7     0.63     3.14     0.90 o
  -1   5   7   988.63   958.30    12.57 o
   1   5   7  3710.56  3660.40    36.36 o
  -8   6   7   501.17   503.61     7.18 o
  -6   6   7  1610.30  1625.30    14.81 o
  -4   6   7   328.25   351.90     5.84 o
  -2   6   7  1973.88  2038.69    23.34 o
   0   6   7    73.83    72.71     4.04 o
   2   6   7  1026.15  1065.13    21.10 o
  -9   7   7   103.29   119.84    10.32 o
  -7   7   7    20.13    22.89     1.80 o
  -5   7   7    14.02    17.51     1.80 o
  -3   7   7  1052.87  1063.78    14.36 o
  -1   7   7    31.66    45.33     3.14 o
   1   7   7   457.50   459.62    11.22 o
  -8   8   7  1359.75  1325.91    18.40 o
  -6   8   7  2741.25  2756.85    23.34 o
  -4   8   7   554.03   531.44     7.63 o
  -2   8   7  2060.27  2039.59    23.34 o
   0   8   7   606.59   596.08    10.77 o
  -7   9   7   112.07   108.62     3.59 o
  -5   9   7  1089.42  1039.09    12.12 o
  -3   9   7   412.79   447.51     8.53 o
  -1   9   7    98.55   103.68     4.49 o
   1   9   7  1537.00  1424.21    35.46 o
  -6  10   7   165.38   151.71     5.39 o
  -4  10   7   914.60   907.13    11.67 o
  -2  10   7   622.33   590.69    10.77 o
   0  10   7     0.12     1.35     2.24 <
  -5  11   7  1845.63  1850.17    32.77 o
  -3  11   7   214.43   208.27     7.18 o
  -8   0   8  1802.04  1755.46    30.07 o
  -6   0   8   931.30   971.77    17.51 o
  -4   0   8  2162.45  2191.30    24.69 o
  -2   0   8    23.99    20.65     2.69 o
   0   0   8  1566.73  1555.28    23.34 o
  -9   1   8  1881.89  1936.80    27.83 o
  -7   1   8  1463.60  1414.78    13.91 o
  -5   1   8    54.10    47.13     1.80 o
  -3   1   8   718.99   785.49     9.87 o
  -1   1   8  1940.19  1887.88    18.85 o
   1   1   8  1280.51  1206.97    35.91 o
  -8   2   8   123.79   138.25     4.04 o
  -6   2   8   894.92   864.49    12.12 o
  -4   2   8   216.85   222.63     4.04 o
  -2   2   8   867.10   832.17    10.32 o
   0   2   8     0.49     0.90     1.35 <
  -9   3   8   132.63   136.00     4.94 o
  -7   3   8    29.72    21.10     1.80 o
  -5   3   8    21.14    20.65     1.80 o
  -3   3   8   379.38   413.39     5.84 o
  -1   3   8  1063.80  1061.54    12.12 o
   1   3   8   209.93   217.24    13.02 o
  -8   4   8   540.99   504.96     9.43 o
  -6   4   8     1.80     2.69     1.35 <
  -4   4   8    16.70    14.36     1.35 o
  -2   4   8   197.31   175.95     4.04 o
   0   4   8    30.86    36.81     2.69 o
  -7   5   8   173.75   158.45     4.04 o
  -5   5   8   160.27   188.07     4.94 o
  -3   5   8   109.87   127.92     4.04 o
  -1   5   8  1220.39  1247.81    15.71 o
  -8   6   8    12.60     9.87     2.69 o
  -6   6   8     5.31     4.94     1.80 <
  -4   6   8   165.35   149.02     4.49 o
  -2   6   8    90.62    87.98     4.04 o
  -7   7   8  1673.30  1620.36    32.32 o
  -5   7   8     0.39     1.35     1.80 <
  -3   7   8    97.62   106.83     4.49 o
  -1   7   8  1438.18  1407.15    39.95 o
  -6   8   8  1365.78  1353.74    26.03 o
  -4   8   8   329.48   343.37     8.08 o
  -2   8   8   660.34   684.05    23.79 o
  -5   9   8     1.67     3.14     4.04 <
  -8   0   9   237.94   284.57    20.65 o
  -6   0   9  1947.33  1900.44    33.66 o
  -4   0   9  3626.94  3589.03    46.68 o
  -2   0   9     0.33     2.24     3.59 <
  -7   1   9   376.78   408.01     9.87 o
  -5   1   9     1.65     1.35     1.35 <
  -3   1   9   512.43   547.60     8.98 o
  -8   2   9   160.70   154.40     7.63 o
  -6   2   9  1551.72  1528.79    23.79 o
  -4   2   9    49.59    61.94     2.69 o
  -2   2   9   796.43   765.74    21.99 o
  -7   3   9   633.51   627.50    15.71 o
  -5   3   9   236.40   213.65     5.39 o
  -3   3   9  3561.55  3643.34    45.78 o
  -6   4   9  1372.72  1369.00    28.73 o
  -4   4   9    22.86    36.36     5.39 o
  -2   4   9    20.25    14.81     4.04 o

#===============================================================================
data_oligoclase_spindle
#===============================================================================

# 1. CHEMICAL DATA

_chemical_name_mineral                   oligoclase
_chemical_formula_sum                    'Ca0.28 Na0.72 Al1.28 Si2.72 O8'
_chemical_formula_weight                 266.7
_chemical_compound_source                'Harts Range, Australia'

#===============================================================================

# 2. CRYSTAL DATA

_symmetry_cell_setting                   triclinic
_symmetry_space_group_name_H-M           'C-1'
_symmetry_space_group_name_Hall          -C
_symmetry_Int_Tables_number              2

loop_
 _space_group_symop_id
 _space_group_symop_operation_xyz
 1   x,y,z
 2   -x,-y,-z
 3   x+1/2,y+1/2,z
 4   -x+1/2,-y+1/2,-z

_cell_length_a                           8.1225(11)
_cell_length_b                           12.8711(7)
_cell_length_c                           7.1774(4)
_cell_angle_alpha                        93.894(5)
_cell_angle_beta                         116.584(8)
_cell_angle_gamma                        89.144(10)
_cell_volume                             669.38(11)
_cell_formula_units_Z                    4
_cell_measurement_reflns_used            1561
_cell_measurement_theta_min              5.24
_cell_measurement_theta_max              28.88
_cell_special_details
;
The unit cell is indexed and refined with the other domains using CrysAlis Pro,
which allows simultaneous indexing and refinemnet of multiple domains.
Then the fixed unit cells are used to integrate the peaks from all domains in 
APEX3. A fixed box size of of 0.3x?0.3x0.3 was used for the integration, which
provides better results than the larger box sizes. The "Minium Common Volume" 
was set to 0.001% for twin overlap determination. The HKLF4 file, created with 
intensities from both Albite-twin domains, is used for structure refinement. 
;
_cell_measurement_temperature            100
_exptl_crystal_description               lamellar
_exptl_crystal_density_diffrn            2.6464
_exptl_crystal_F_000                     529
_exptl_absorpt_coefficient_mu            1.1

#===============================================================================

# 3. EXPERIMENTAL DATA

_diffrn_ambient_temperature              100
_diffrn_source                           'Mo microfocus Rotating Anode'
_diffrn_source_power                     2.5
_diffrn_source_voltage                   50
_diffrn_source_current                   50
_diffrn_radiation_type                   'Mo K\a'
_diffrn_radiation_wavelength             0.71073
_diffrn_radiation_monochromator          graphite
_diffrn_measurement_device               'four-circle diffractometer'
_diffrn_measurement_device_type          'Bruker CCD'
_diffrn_detector                         'APEX II'
_diffrn_detector_area_resol_mean         16.67
_diffrn_measurement_method               '6\w scans'
_diffrn_measurement_specimen_support     'MiTeGen MicroMount 50'
_diffrn_reflns_number                    3459
_diffrn_reflns_theta_min                 3.17
_diffrn_reflns_theta_max                 29.71
_diffrn_reflns_theta_full                29.04
_diffrn_measured_fraction_theta_max      0.95
_diffrn_measured_fraction_theta_full     0.98
_diffrn_reflns_av_R_equivalents          0.0976
_diffrn_reflns_av_unetI/netI             0.2626
_diffrn_reflns_limit_h_min               -11
_diffrn_reflns_limit_h_max               11
_diffrn_reflns_limit_k_min               -17
_diffrn_reflns_limit_k_max               17
_diffrn_reflns_limit_l_min               -10
_diffrn_reflns_limit_l_max               9
_diffrn_radiation_probe                  X-ray

#===============================================================================

# 4. REFINEMENT DATA

_refine_special_details
; 
Two split M sites are used in the refinement, with the initial Na/Ca ratio for
each site fixed at 3:1, and then relaxed once the occupancy of each site has
converged. The Al occupancies of the tetrahedral sites are calculated following
equation: Occ_Al=0.25(1+n_An)+(<T_i-O>-<<T-O>>)/0.135 (Kroll and Ribbe 1983).
The not matching reflections with |F(obs)-F(cal)|>3*sig(F(obs)) are skipped in 
the refinement.
;
_reflns_number_total                     1634
_reflns_number_gt                        873
_reflns_threshold_expression             'I>3\s(I)'
_refine_ls_structure_factor_coef         Fsqd
_refine_ls_R_factor_gt                   0.0435
_refine_ls_wR_factor_gt                  0.0708
_refine_ls_R_factor_all                  0.1269
_refine_ls_wR_factor_ref                 0.0844
_refine_ls_goodness_of_fit_ref           1.04
_refine_ls_goodness_of_fit_gt            1.24
_refine_ls_number_reflns                 1634
_refine_ls_number_parameters             130
_refine_ls_number_restraints             0
_refine_ls_number_constraints            55
_refine_ls_weighting_scheme              sigma
_refine_ls_weighting_details             'w=1/(\s^2^(I)+0.0004I^2^)'
_refine_ls_shift/su_max                  0.0057
_refine_ls_shift/su_mean                 0.0006
_refine_diff_density_max                 0.92
_refine_diff_density_min                 -1.02
_refine_ls_extinction_method             'none'

loop_
 _atom_type_symbol
 _atom_type_scat_dispersion_real
 _atom_type_scat_dispersion_imag
 _atom_type_scat_source
 Al   0.0645  0.0514
 'International Tables Vol C tables 4.2.6.8 and 6.1.1.1'
 Ca   0.2262  0.3064
 'International Tables Vol C tables 4.2.6.8 and 6.1.1.1'
 Na   0.0362  0.0249
 'International Tables Vol C tables 4.2.6.8 and 6.1.1.1'
 O    0.0106  0.0060
 'International Tables Vol C tables 4.2.6.8 and 6.1.1.1'
 Si   0.0817  0.0704
 'International Tables Vol C tables 4.2.6.8 and 6.1.1.1'

#===============================================================================

# 5. ATOMIC COORDINATES AND DISPLACEMENT PARAMETERS

loop_
 _atom_site_label
 _atom_site_type_symbol
 _atom_site_fract_x
 _atom_site_fract_y
 _atom_site_fract_z
 _atom_site_adp_type
 _atom_site_U_iso_or_equiv
 _atom_site_site_symmetry_multiplicity
 _atom_site_occupancy
 _atom_site_calc_flag
 _atom_site_refinement_flags
 _atom_site_disorder_assembly
 _atom_site_disorder_group
  Mca Ca 0.7277(7) -0.0259(12) -0.1010(18) Uani 0.029(2) 4 0.09(6) d . . .
  Mna Na 0.7277(7) -0.0259(12) -0.1010(18) Uani 0.029(2) 4 0.36(12) d . . .
  Mca' Ca 0.7346(4) 0.0162(12) -0.1601(16) Uani 0.039(2) 4 0.19(6) d . . .
  Mna' Na 0.7346(4) 0.0162(12) -0.1601(16) Uani 0.039(2) 4 0.36(15) d . . .
  T1osi Si 0.00780(14) 0.16588(9) 0.21136(14) Uani 0.0186(4) 4 0.2953 d . . .
  T1oal Al 0.00780(14) 0.16588(9) 0.21136(14) Uani 0.0186(4) 4 0.7047 d . . .
  T1msi Si 0.49668(13) -0.31819(9) -0.23295(14) Uani 0.0178(4) 4 0.8008 d . . .
  T1mal Al 0.49668(13) -0.31819(9) -0.23295(14) Uani 0.0178(4) 4 0.1992 d . . .
  T2osi Si 0.31233(13) -0.10912(9) -0.31643(14) Uani 0.0178(4) 4 0.8119 d . . .
  T2oal Al 0.31233(13) -0.10912(9) -0.31643(14) Uani 0.0178(4) 4 0.1881 d . . .
  T2msi Si 0.31936(13) 0.12006(9) -0.35759(13) Uani 0.0175(4) 4 0.8119 d . . .
  T2mal Al 0.31936(13) 0.12006(9) -0.35759(13) Uani 0.0175(4) 4 0.1881 d . . .
  Oa1 O 0.5045(3) -0.3696(2) -0.0250(3) Uani 0.0226(10) 4 1 d . . .
  Oa2 O 0.4135(3) 0.0059(2) -0.2798(3) Uani 0.0211(10) 4 1 d . . .
  Obo O 0.1860(3) -0.1073(2) -0.1917(3) Uani 0.0247(11) 4 1 d . . .
  Obm O 0.6826(3) -0.3521(2) -0.2512(4) Uani 0.0286(12) 4 1 d . . .
  Oco O 0.4877(3) 0.2045(2) -0.2744(3) Uani 0.0229(11) 4 1 d . . .
  Ocm O 0.4814(3) -0.1907(2) -0.2195(3) Uani 0.0241(10) 4 1 d . . .
  Odo O 0.2027(3) 0.1093(2) -0.6124(3) Uani 0.0224(11) 4 1 d . . .
  Odm O 0.1885(3) -0.1328(2) -0.5669(3) Uani 0.0246(11) 4 1 d . . .

loop_
 _atom_site_aniso_label
 _atom_site_aniso_type_symbol
 _atom_site_aniso_U_11
 _atom_site_aniso_U_22
 _atom_site_aniso_U_33
 _atom_site_aniso_U_12
 _atom_site_aniso_U_13
 _atom_site_aniso_U_23
 Mca Ca 0.016(3) 0.038(5) 0.030(3) 0.0034(19) 0.0092(18) -0.004(3)
 Mna Na 0.016(3) 0.038(5) 0.030(3) 0.0034(19) 0.0092(18) -0.004(3)
 Mca' Ca 0.021(2) 0.058(5) 0.038(3) -0.0067(16) 0.0153(14) -0.015(3)
 Mna' Na 0.021(2) 0.058(5) 0.038(3) -0.0067(16) 0.0153(14) -0.015(3)
 T1osi Si 0.0153(5) 0.0221(7) 0.0193(5) -0.0036(5) 0.0085(4) 0.0019(4)
 T1oal Al 0.0153(5) 0.0221(7) 0.0193(5) -0.0036(5) 0.0085(4) 0.0019(4)
 T1msi Si 0.0156(5) 0.0196(7) 0.0192(5) 0.0005(4) 0.0086(4) 0.0015(4)
 T1mal Al 0.0156(5) 0.0196(7) 0.0192(5) 0.0005(4) 0.0086(4) 0.0015(4)
 T2osi Si 0.0147(5) 0.0178(6) 0.0220(5) -0.0008(4) 0.0092(4) 0.0018(4)
 T2oal Al 0.0147(5) 0.0178(6) 0.0220(5) -0.0008(4) 0.0092(4) 0.0018(4)
 T2msi Si 0.0148(5) 0.0180(6) 0.0207(5) 0.0007(4) 0.0088(4) 0.0029(4)
 T2mal Al 0.0148(5) 0.0180(6) 0.0207(5) 0.0007(4) 0.0088(4) 0.0029(4)
 Oa1 O 0.0219(13) 0.0203(17) 0.0285(13) -0.0004(12) 0.0136(10) 0.0037(10)
 Oa2 O 0.0148(12) 0.0237(17) 0.0257(13) -0.0005(11) 0.0098(10) 0.0025(10)
 Obo O 0.0221(14) 0.0255(18) 0.0291(13) -0.0032(12) 0.0137(10) 0.0026(11)
 Obm O 0.0250(14) 0.0265(19) 0.0379(15) -0.0033(13) 0.0177(11) -0.0004(12)
 Oco O 0.0178(13) 0.0257(18) 0.0258(13) -0.0020(12) 0.0101(10) 0.0025(11)
 Ocm O 0.0202(13) 0.0267(18) 0.0231(12) 0.0047(12) 0.0080(10) 0.0008(10)
 Odo O 0.0208(14) 0.0215(17) 0.0253(13) -0.0010(12) 0.0105(10) 0.0028(10)
 Odm O 0.0199(14) 0.0206(17) 0.0297(14) -0.0011(12) 0.0079(10) 0.0016(11)

#===============================================================================

# 6. MOLECULAR GEOMETRY

loop_
 _geom_bond_atom_site_label_1
 _geom_bond_atom_site_label_2
 _geom_bond_site_symmetry_1
 _geom_bond_site_symmetry_2
 _geom_bond_distance
 _geom_bond_publ_flag
  T1osi Oa1 . 3_455 1.716(3) y
  T1osi Obo . 2_555 1.700(3) y
  T1osi Oco . 4_555 1.695(3) y
  T1osi Odo . 1_556 1.713(2) y
  T1msi Oa1 . .     1.649(3) y
  T1msi Obm . .     1.624(3) y
  T1msi Ocm . .     1.643(3) y
  T1msi Odm . 4_544 1.641(2) y
  T2osi Oa2 . .     1.651(3) y
  T2osi Obo . .     1.634(3) y
  T2osi Ocm . .     1.635(3) y
  T2osi Odm . .     1.629(2) y
  T2msi Oa2 . .     1.659(3) y
  T2msi Obm . 3_455 1.630(3) y
  T2msi Oco . .     1.623(3) y
  T2msi Odo . .     1.637(2) y

loop_
 _geom_angle_atom_site_label_1
 _geom_angle_atom_site_label_2
 _geom_angle_atom_site_label_3
 _geom_angle_site_symmetry_1
 _geom_angle_site_symmetry_2
 _geom_angle_site_symmetry_3
 _geom_angle
 _geom_angle_publ_flag
  Oa1 T1osi Obo   3_455 . 2_555 102.91(13) n
  Oa1 T1osi Oco   3_455 . 4_555 116.41(15) n
  Oa1 T1osi Odo   3_455 . 1_556 103.64(14) n
  Obo T1osi Oco   2_555 . 4_555 111.55(15) n
  Obo T1osi Odo   2_555 . 1_556 111.63(14) n
  Oco T1osi Odo   4_555 . 1_556 110.31(12) n
  Oa1 T1msi Obm       . . .     107.20(14) n
  Oa1 T1msi Ocm       . . .     112.34(15) n
  Oa1 T1msi Odm       . . 4_544 106.37(15) n
  Obm T1msi Ocm       . . .     110.45(16) n
  Obm T1msi Odm       . . 4_544 111.56(15) n
  Ocm T1msi Odm       . . 4_544 108.87(13) n
  Oa2 T2osi Obo       . . .     109.37(15) n
  Oa2 T2osi Ocm       . . .     104.90(13) n
  Oa2 T2osi Odm       . . .     107.57(14) n
  Obo T2osi Ocm       . . .     111.08(15) n
  Obo T2osi Odm       . . .     111.62(14) n
  Ocm T2osi Odm       . . .     111.98(14) n
  Oa2 T2msi Obm       . . 3_455 108.16(16) n
  Oa2 T2msi Oco       . . .     106.48(13) n
  Oa2 T2msi Odo       . . .     107.98(13) n
  Obm T2msi Oco   3_455 . .     110.45(14) n
  Obm T2msi Odo   3_455 . .     110.41(13) n
  Oco T2msi Odo       . . .     113.13(15) n
  T1osi Oa1 T1msi 3_545 . .     140.88(19) n
  T2osi Oa2 T2msi     . . .     129.08(14) n
  T1osi Obo T2osi 2_555 . .     138.93(16) n
  T1msi Obm T2msi     . . 3_545 159.17(15) n
  T1osi Oco T2msi 4_555 . .     130.34(17) n
  T1msi Ocm T2osi     . . .     134.46(15) n
  T1osi Odo T2msi 1_554 . .     134.11(19) n
  T1msi Odm T2osi 4_544 . .     151.1(2)   n

#===============================================================================

# 7. STRUCTURE-FACTOR LIST

loop_
 _refln_index_h
 _refln_index_k
 _refln_index_l
 _refln_F_squared_calc
 _refln_F_squared_meas
 _refln_F_squared_sigma
 _refln_observed_status
   4   0   0 15070.00 16411.20   409.96 o
   6   0   0 10011.80  9832.82   296.43 o
   8   0   0     5.74    63.07    44.15 <
  -9   1   0   203.44   220.75    69.38 o
  -7   1   0  1291.42  1292.96    69.38 o
  -5   1   0   316.01   334.28    25.23 o
  -3   1   0  2428.77  2541.77    63.07 o
   3   1   0  2008.22  1911.06    44.15 o
   5   1   0   277.02   321.66    31.54 o
   7   1   0   910.32   920.84    63.07 o
   9   1   0    40.31    56.76    63.07 <
 -10   2   0     8.19   113.53   119.84 <
  -8   2   0   571.12   643.33    81.99 o
  -6   2   0  2095.59  2169.65    81.99 o
   4   2   0  2241.65  2440.86    63.07 o
   6   2   0  4616.90  4616.82   151.37 o
   8   2   0   409.01   353.20    75.69 o
  10   2   0   429.67    94.61   189.21 <
  -9   3   0   803.68   819.93    94.61 o
  -7   3   0   268.21   334.28    69.38 o
  -3   3   0   574.31   611.79    31.54 o
   3   3   0  1309.31  1236.20    44.15 o
   5   3   0  2382.86  2522.85    88.30 o
   7   3   0    87.32    75.69    56.76 <
   9   3   0  1496.46  1564.17   126.14 o
  -8   4   0   998.21  1091.13    94.61 o
  -6   4   0  7624.45  7051.37   271.21 o
  -4   4   0   323.42   365.81    25.23 o
   4   4   0    11.03    44.15    18.92 <
   6   4   0  7400.29  7202.75   283.82 o
   8   4   0  1663.36  1734.46   119.84 o
  -9   5   0   116.27   126.14    81.99 <
  -7   5   0   141.96    69.38    56.76 <
  -5   5   0   863.76   996.53    69.38 o
  -3   5   0    39.03    63.07    12.61 o
   5   5   0   418.60   491.96    56.76 o
   7   5   0   975.12   895.61    88.30 o
   9   5   0    37.98    63.07    75.69 <
  -8   6   0  2043.70  1961.52   138.76 o
  -6   6   0    90.92   126.14    44.15 <
   2   6   0  5350.78  6067.46   302.74 o
   4   6   0  4949.50  5285.38   195.52 o
   6   6   0   392.70   567.64    69.38 o
   8   6   0  1115.89  1040.68   100.91 o
  -9   7   0     0.03    94.61   163.99 <
  -7   7   0   595.32   454.11    69.38 o
  -5   7   0   622.04   719.01    69.38 o
  -3   7   0   981.64  1002.83    63.07 o
   1   7   0   363.40     0.00   416.27 <
   3   7   0  1365.61  1431.72    75.69 o
   5   7   0  1134.83  1135.28    81.99 o
   7   7   0   229.53   327.97    69.38 o
   9   7   0   198.62   473.04   189.21 <
  -8   8   0  1137.80  1255.12   113.53 o
  -6   8   0    56.68    94.61    56.76 <
  -2   8   0 10905.50 23929.30 40340.40 <
   2   8   0  9616.06 24818.60 42074.90 <
   4   8   0  1887.52  1766.00    81.99 o
   6   8   0     4.37    31.54    50.46 <
   8   8   0  3079.86  2964.35   163.99 o
  -7   9   0     1.85    12.61    63.07 <
   1   9   0  6058.23     0.00  3841.04 <
   3   9   0    94.39   132.45    56.76 <
   5   9   0  1566.71  1797.53    94.61 o
   7   9   0   632.89   428.89   145.06 <
  -8  10   0   186.20   189.21   113.53 <
  -6  10   0    10.35     6.31    69.38 <
  -4  10   0   292.63   416.27    56.76 o
  -2  10   0   757.05   920.84  1564.17 <
   2  10   0    34.31   403.66  1627.24 <
   4  10   0     0.17    37.84    69.38 <
   6  10   0   204.73   340.58   100.91 o
   8  10   0    19.18   113.53   113.53 <
  -7  11   0    53.19    75.69    81.99 <
  -5  11   0   205.31   264.90    81.99 o
  -1  11   0     4.92   649.64   227.06 <
   1  11   0   199.28     0.00   227.06 <
   3  11   0   247.57   428.89    81.99 o
   5  11   0   193.47   132.45    81.99 <
   7  11   0   509.65   327.97   107.22 o
  -6  12   0    41.20    63.07    81.99 <
  -4  12   0     0.45    50.46    75.69 <
   0  12   0   307.10  3670.75  1955.21 <
   2  12   0  1131.59     0.00   643.33 <
   4  12   0   312.28   258.59    81.99 o
   6  12   0   324.36   170.29   107.22 <
  -7  13   0    73.37   113.53   126.14 <
  -5  13   0   708.89   731.63   119.84 o
  -3  13   0   264.89   416.27    88.30 o
   1  13   0   405.37     0.00   365.81 <
   3  13   0   586.71   643.33   107.22 o
   5  13   0   270.59   239.67   100.91 <
  -6  14   0   267.85   517.18   100.91 o
  -4  14   0   973.63  1324.50   145.06 o
  -2  14   0   204.08  5512.43  4150.09 <
   0  14   0  1417.04  8205.58  4162.71 <
   2  14   0    39.60   302.74  4320.39 <
   4  14   0    15.56    94.61   113.53 <
   6  14   0   881.24   731.63   157.68 o
  -3  15   0   156.67   258.59   100.91 <
  -1  15   0   186.36     0.00   346.89 <
   1  15   0   324.02   719.01   340.58 <
   3  15   0   461.16   416.27   107.22 o
  -2  16   0     0.90     6.31  3368.01 <
   2  16   0   149.89     0.00  6458.50 <
  -1  17   0   149.46   157.68  3311.24 <
   1  17   0     0.58   201.83  3456.31 <
  -1 -17   1   340.63  1967.83  1091.13 <
  -2 -16   1   579.36     0.00   649.64 <
   2 -16   1   103.95   466.73   138.76 o
  -5 -15   1     2.65   157.68  7366.73 <
  -3 -15   1   524.54   138.76  1847.99 <
   1 -15   1   458.86   529.80   157.68 o
   3 -15   1   970.80  1223.58   151.37 o
  -6 -14   1   252.88   517.18  4433.91 <
  -4 -14   1   453.32   668.56  1766.00 <
  -2 -14   1     1.90  3967.19 15212.80 <
   2 -14   1    29.81    94.61    75.69 <
   4 -14   1     4.98    25.23    75.69 <
  -7 -13   1   175.47   346.89   201.83 <
  -5 -13   1   438.90   227.06   145.06 <
  -3 -13   1     2.07     0.00  1305.58 <
   5 -13   1    93.24   138.76   107.22 <
  -6 -12   1   270.88   157.68   170.29 <
  -2 -12   1  2627.72 16821.10 22661.50 <
   2 -12   1  1755.90  2011.98   107.22 o
   4 -12   1   465.14   384.73    88.30 o
   6 -12   1   152.56   176.60    94.61 <
  -7 -11   1    15.28    94.61   113.53 <
  -5 -11   1    91.36    94.61   132.45 <
   3 -11   1   381.28   555.03    63.07 o
   5 -11   1     3.96     0.00    50.46 <
   7 -11   1   294.24   340.58    88.30 o
  -8 -10   1     0.29    12.61    81.99 <
  -6 -10   1     3.76    63.07  2951.74 <
  -4 -10   1    99.96   302.74   132.45 <
   4 -10   1    22.67    25.23    50.46 <
   6 -10   1   409.30   384.73    75.69 o
   8 -10   1    82.33    75.69   220.75 <
  -7  -9   1   494.04   996.53  4320.39 <
  -5  -9   1   487.90   428.89  2825.60 <
  -3  -9   1    11.65   271.21   170.29 <
   3  -9   1    33.55    63.07    44.15 <
   5  -9   1   182.86   227.06    63.07 o
   7  -9   1   960.88   983.91   100.91 o
  -8  -8   1  1191.37  1229.89   189.21 o
  -6  -8   1   407.04   309.05  3153.57 <
   2  -8   1  2491.38  2459.78    94.61 o
   4  -8   1  1686.50  1583.09    88.30 o
   6  -8   1   133.27   119.84    63.07 <
   8  -8   1  1626.29  1551.55   126.14 o
  -9  -7   1   425.11   403.66   119.84 o
  -7  -7   1    16.81   126.14   113.53 <
  -3  -7   1   362.09   302.74    56.76 o
   3  -7   1   177.31   214.44    44.15 o
   5  -7   1   747.39   756.86    69.38 o
   7  -7   1    47.97     0.00    56.76 <
  -8  -6   1    86.95    75.69    56.76 <
  -6  -6   1     8.45    44.15    81.99 <
   2  -6   1   637.43   725.32    31.54 o
   4  -6   1   884.03   807.31    63.07 o
   6  -6   1    14.35    63.07    50.46 <
   8  -6   1   171.82   138.76    81.99 <
  -9  -5   1    32.71    37.84    75.69 <
   1  -5   1  3229.79  3475.23   107.22 o
   3  -5   1  2439.94  2459.78    75.69 o
   5  -5   1     2.22    37.84    44.15 <
   7  -5   1   436.47   441.50    75.69 o
 -10  -4   1   219.86   214.44   100.91 <
  -8  -4   1  1088.34  1072.21    94.61 o
  -6  -4   1    10.89   605.48   227.06 <
   4  -4   1  1387.74  1419.10    56.76 o
   6  -4   1  1440.41  1349.73    88.30 o
   8  -4   1   441.38   473.04    88.30 o
  -9  -3   1   254.82   290.13    75.69 o
  -7  -3   1   292.30   277.51    69.38 o
  -5  -3   1  1733.90  2043.51   132.45 o
  -1  -3   1  3492.79  3651.83   100.91 o
   1  -3   1  9007.05  9706.68   245.98 o
   3  -3   1  1218.67  1185.74    37.84 o
   5  -3   1    72.41    63.07    31.54 <
   7  -3   1   378.76   378.43    69.38 o
   9  -3   1     2.17    12.61    94.61 <
 -10  -2   1   274.30   340.58    88.30 o
  -8  -2   1   412.87   447.81    69.38 o
  -2  -2   1  1540.53  1608.32    44.15 o
   0  -2   1   301.21   290.13    12.61 o
   2  -2   1  1687.34  1671.39    44.15 o
   4  -2   1   347.84   384.73    25.23 o
   6  -2   1     4.24    18.92    37.84 <
   8  -2   1   220.07   201.83    75.69 <
  -9  -1   1   294.92   372.12    69.38 o
  -1  -1   1   334.58   321.66    12.61 o
   1  -1   1  3867.60  3910.42    94.61 o
   5  -1   1   596.28   655.94    37.84 o
   7  -1   1  1343.41  1185.74    69.38 o
   9  -1   1   787.00   744.24   107.22 o
 -10   0   1   186.92   176.60    94.61 <
   0   0   1   299.06   290.13    12.61 o
   2   0   1     1.37    12.61     6.31 <
   4   0   1  1457.81  1488.48    44.15 o
   6   0   1  1753.99  1778.61    69.38 o
   8   0   1   282.47   233.36    50.46 o
  -9   1   1   514.94   662.25    81.99 o
  -7   1   1   354.82   416.27    56.76 o
  -1   1   1   251.55   277.51    12.61 o
   1   1   1  8080.96  7656.86   170.29 o
   3   1   1  1384.85  1438.03    37.84 o
   5   1   1   372.92   359.51    31.54 o
   7   1   1  1711.89  1646.16    81.99 o
   9   1   1   756.41   744.24    88.30 o
 -10   2   1  1040.88  1166.82   113.53 o
  -8   2   1    92.11   176.60    56.76 o
  -2   2   1     0.25    37.84    12.61 o
   0   2   1     3.66    18.92    12.61 <
   2   2   1  1732.80  1702.93    50.46 o
   4   2   1     3.61    12.61    18.92 <
   6   2   1    15.03    37.84    31.54 <
   8   2   1    38.87    37.84    63.07 <
  -9   3   1   119.88    75.69    69.38 <
  -7   3   1    34.24    18.92    63.07 <
  -1   3   1   165.72   145.06    44.15 o
   1   3   1  8606.68  8584.01   195.52 o
   3   3   1   925.08   895.61    31.54 o
   5   3   1   670.77   750.55    50.46 o
   7   3   1   455.09   296.43    69.38 o
   9   3   1    25.74     0.00   132.45 <
 -10   4   1    40.99    75.69   100.91 <
  -8   4   1   404.93   435.19    69.38 o
  -6   4   1  3185.55  3525.69   233.36 o
   0   4   1   267.31   271.21    44.15 o
   2   4   1  1219.86  1261.43    37.84 o
   4   4   1  4019.87  4112.25   119.84 o
   6   4   1   596.67   668.56    75.69 o
   8   4   1   178.28   107.22    69.38 <
  -9   5   1    72.70   100.91    69.38 <
  -7   5   1   918.59  1110.06   119.84 o
  -5   5   1  1820.71  1879.53   170.29 o
   1   5   1  5679.17  5663.81   138.76 o
   3   5   1  5014.54  5184.46   176.60 o
   5   5   1     2.77   100.91    50.46 <
   7   5   1   165.59    81.99    63.07 <
 -10   6   1   592.59  1091.13   227.06 o
  -8   6   1   330.25   290.13    75.69 o
  -6   6   1    17.74    44.15    88.30 <
  -4   6   1 10259.20  8502.01   649.64 o
  -2   6   1    24.36    69.38    25.23 <
   2   6   1   293.27   290.13    25.23 o
   4   6   1    60.72    56.76    44.15 <
   6   6   1   365.92   365.81    69.38 o
   8   6   1    40.33    44.15    75.69 <
  -9   7   1   249.51   327.97   119.84 <
  -7   7   1   238.79   170.29   119.84 <
  -5   7   1  1415.92  1110.06   145.06 o
  -3   7   1    30.44   126.14    56.76 <
  -1   7   1  1075.86  1166.82    44.15 o
   1   7   1   625.12   637.02    37.84 o
   3   7   1   717.19   687.48    56.76 o
   5   7   1     1.72    31.54    50.46 <
   7   7   1   167.84   132.45    75.69 <
  -8   8   1   132.06    56.76   126.14 <
  -6   8   1    47.51   302.74  3292.32 <
  -2   8   1   236.62  1450.64   687.48 <
   2   8   1  3394.08  3386.93   119.84 o
   4   8   1   866.92   737.93    63.07 o
   6   8   1   601.07   737.93    81.99 o
   8   8   1    19.72   157.68   107.22 <
  -7   9   1  1405.37  1450.64  4503.29 <
  -5   9   1   108.82   290.13  2945.43 <
  -3   9   1  2172.70  1911.06   170.29 o
  -1   9   1  1776.87  1967.83    88.30 o
   1   9   1   223.96   277.51    37.84 o
   3   9   1   524.19   561.34    50.46 o
   5   9   1   229.15   113.53    50.46 <
   7   9   1   192.63   132.45    81.99 <
  -8  10   1    46.67    88.30   145.06 <
  -6  10   1   126.12    18.92  3084.19 <
  -4  10   1   591.33   372.12   132.45 <
  -2  10   1  1624.31  2056.13   170.29 o
   0  10   1     4.30    12.61    37.84 <
   2  10   1   803.29   857.77    63.07 o
   4  10   1   283.11   239.67    56.76 o
   6  10   1   269.29   220.75    69.38 o
  -7  11   1     2.99    50.46   113.53 <
  -5  11   1    31.34    75.69   132.45 <
   1  11   1   163.46   290.13    63.07 o
   3  11   1   401.98   372.12    56.76 o
   5  11   1    19.36    37.84    88.30 <
  -6  12   1    95.48   201.83   170.29 <
  -4  12   1  1927.45  1526.33   227.06 o
  -2  12   1     1.38  2018.28 22800.30 <
   2  12   1  1204.36  1267.73    88.30 o
   4  12   1   528.70   517.18   107.22 o
   6  12   1   335.75   403.66   107.22 o
  -7  13   1   495.50   851.46   189.21 o
  -5  13   1    64.76   378.43   151.37 <
  -3  13   1    28.31   252.29  1255.12 <
   3  13   1   272.69   466.73   113.53 o
   5  13   1    20.26   113.53   107.22 <
  -6  14   1   812.28  1028.06  4257.31 <
  -4  14   1   190.58   327.97  1696.62 <
  -2  14   1  1200.37  2453.47 15868.70 <
   2  14   1     0.00    37.84    75.69 <
   4  14   1  1250.46  1084.83   145.06 o
  -5  15   1   328.13   353.20  7076.60 <
  -3  15   1   871.35  1065.91  1772.30 <
  -1  15   1    47.03   245.98    81.99 o
   1  15   1   509.63   454.11    94.61 o
   3  15   1    62.38    44.15   100.91 <
   0  16   1   222.49   296.43    94.61 o
   2  16   1   157.37   151.37   113.53 <
  -1  17   1    45.99   132.45    94.61 <
   1  17   1   706.17   586.56   151.37 o
  -4 -16   2     9.04    12.61   119.84 <
   2 -16   2     3.03    63.07   100.91 <
  -5 -15   2   410.38   416.27   119.84 o
  -3 -15   2   506.57   883.00   126.14 o
   1 -15   2   454.02   662.25   132.45 o
   3 -15   2   138.50    37.84    94.61 <
  -6 -14   2  1249.63  1406.49   176.60 o
   2 -14   2    72.52    81.99    81.99 <
   4 -14   2  1571.46  1311.88   132.45 o
  -7 -13   2   364.17   296.43   195.52 <
  -5 -13   2    55.30   100.91    94.61 <
   1 -13   2   865.37   952.38    75.69 o
   3 -13   2    76.85    75.69    56.76 <
   5 -13   2   347.17   327.97   113.53 <
  -8 -12   2    32.92    50.46  3002.20 <
  -6 -12   2    22.14   126.14   126.14 <
  -2 -12   2     0.06   100.91   138.76 <
   2 -12   2   944.00   946.07    75.69 o
   4 -12   2    31.18    12.61    56.76 <
   6 -12   2   457.77   441.50   138.76 o
  -7 -11   2  2082.50  2075.05   252.29 o
  -5 -11   2  1184.79  1368.65   126.14 o
  -1 -11   2  3590.72  3563.53   195.52 o
   1 -11   2   304.30   422.58    56.76 o
   3 -11   2  1398.94  1387.57    81.99 o
   5 -11   2  1083.90   990.22    88.30 o
  -8 -10   2   141.32    63.07  2459.78 <
  -6 -10   2   352.86   466.73   138.76 o
  -4 -10   2   107.50   163.99    63.07 <
   2 -10   2     2.19    18.92    37.84 <
   6 -10   2    39.52    25.23    56.76 <
  -9  -9   2     6.31    88.30  6426.97 <
  -7  -9   2  2105.96  2093.97  5329.53 <
   1  -9   2   413.55   359.51    37.84 o
   3  -9   2  1049.23  1028.06    69.38 o
   5  -9   2  2006.67  1892.14   107.22 o
   7  -9   2    12.59     0.00    81.99 <
  -8  -8   2  1600.17  1236.20  5461.98 <
  -6  -8   2   389.51   529.80   119.84 o
   0  -8   2  2828.77  2825.60    75.69 o
   2  -8   2  8548.59  8779.53   258.59 o
   4  -8   2   283.10   264.90    56.76 o
   6  -8   2  1998.49  1847.99   119.84 o
  -9  -7   2   169.49   170.29  2995.89 <
  -7  -7   2    49.43     0.00   138.76 <
  -5  -7   2   349.29   365.81    63.07 o
  -3  -7   2   447.26   491.96    44.15 o
   1  -7   2  1638.89  1803.84    50.46 o
   3  -7   2    40.80    18.92    50.46 <
   5  -7   2    24.10    12.61    50.46 <
   7  -7   2   222.12   170.29    75.69 <
 -10  -6   2   165.77   990.22  8779.53 <
  -8  -6   2   217.30   403.66  3740.13 <
  -6  -6   2   830.57   939.76    75.69 o
   0  -6   2  4871.81  5121.39   119.84 o
   2  -6   2  2292.71  2377.79    63.07 o
   4  -6   2   354.24   353.20    50.46 o
   6  -6   2   877.84   794.70    81.99 o
   8  -6   2   391.79   271.21   132.45 <
  -9  -5   2     0.06     0.00   100.91 <
  -7  -5   2  2868.93  2825.60   227.06 o
  -5  -5   2   169.82   233.36    25.23 o
  -3  -5   2    48.46    56.76    18.92 <
   1  -5   2    22.26     6.31    12.61 <
   3  -5   2   100.34   126.14    25.23 o
   5  -5   2  3483.16  3399.54   138.76 o
   7  -5   2   122.22   138.76    75.69 <
 -10  -4   2   548.80   580.26   151.37 o
  -8  -4   2   145.06    88.30    94.61 <
   2  -4   2  5862.91  5871.94   132.45 o
   4  -4   2  2345.56  2346.25    81.99 o
   6  -4   2    16.14    75.69    63.07 <
   8  -4   2   160.23     0.00    63.07 <
  -9  -3   2   988.61   700.09   138.76 o
  -7  -3   2   220.99   277.51    50.46 o
  -1  -3   2  2463.16  2352.56    50.46 o
   1  -3   2   977.13   889.31    31.54 o
   3  -3   2  1204.56  1204.66    44.15 o
   5  -3   2    95.48    50.46    37.84 <
   7  -3   2  1358.11  1400.18   100.91 o
 -10  -2   2    11.66    18.92   126.14 <
  -8  -2   2  1338.41  1538.94   163.99 o
  -4  -2   2  2327.54  2365.17    63.07 o
  -2  -2   2  5298.68  5102.47   113.53 o
   2  -2   2  3379.94  3292.32    81.99 o
   4  -2   2  2226.38  2194.88    69.38 o
   6  -2   2  2166.21  2220.11    88.30 o
   8  -2   2    61.11   138.76    75.69 <
  -9  -1   2    67.99   138.76    94.61 <
  -7  -1   2   324.18   428.89    56.76 o
  -5  -1   2    45.07    37.84    12.61 o
   3  -1   2    74.98    94.61    12.61 o
   5  -1   2   113.78   119.84    31.54 o
   7  -1   2   420.12   403.66    56.76 o
 -10   0   2   194.03   227.06   151.37 <
  -8   0   2    14.21    37.84    50.46 <
  -4   0   2  2110.53  2257.95    50.46 o
  -2   0   2 27812.50 26653.90   580.26 o
   0   0   2 33331.90 32614.20   681.17 o
   2   0   2   738.18   813.62    31.54 o
   4   0   2 14916.20 15559.70   409.96 o
   6   0   2    96.91    44.15    44.15 <
   8   0   2   335.16   201.83    75.69 <
  -9   1   2   180.27   100.91    94.61 <
  -7   1   2   218.49   372.12    56.76 o
  -5   1   2   159.87   182.91    18.92 o
   3   1   2    25.66    44.15    12.61 o
   5   1   2    81.59    63.07    31.54 <
   7   1   2   290.40   264.90    69.38 o
 -10   2   2    77.87    69.38   132.45 <
  -8   2   2  1678.76  2030.90   163.99 o
  -4   2   2 10957.00 11365.50   264.90 o
  -2   2   2   250.76   233.36    12.61 o
   0   2   2   122.72   113.53    12.61 o
   2   2   2  8509.96  8628.16   208.13 o
   4   2   2   204.38   176.60    25.23 o
   6   2   2  1694.88  1507.40    94.61 o
   8   2   2   223.52   201.83    75.69 <
  -9   3   2   347.35   580.26   145.06 o
  -7   3   2    25.19    75.69    56.76 <
  -3   3   2   503.80   548.72    25.23 o
  -1   3   2  6244.20  5726.88   132.45 o
   3   3   2  2205.17  2207.50    69.38 o
   5   3   2   124.68   145.06    44.15 o
   7   3   2   607.29   504.57    81.99 o
 -10   4   2   233.78   309.05   157.68 <
  -8   4   2     2.50    63.07   100.91 <
  -6   4   2  5534.61  6136.84   170.29 o
  -4   4   2  3800.85  4036.56    94.61 o
  -2   4   2  1507.69  1456.95    50.46 o
   0   4   2  1470.07  1425.41    37.84 o
   2   4   2  5286.11  5525.05   126.14 o
   4   4   2  3956.74  3790.59   145.06 o
   6   4   2    91.57   176.60    56.76 o
   8   4   2   300.79   321.66    88.30 o
  -9   5   2   101.42    50.46   100.91 <
  -5   5   2   204.58   233.36    31.54 o
  -3   5   2   596.74   618.10    31.54 o
   1   5   2  1684.08  1715.54    44.15 o
   3   5   2   447.47   561.34    56.76 o
   5   5   2  2664.22  2630.07   119.84 o
   7   5   2     5.05    37.84    63.07 <
 -10   6   2   811.70   990.22  9157.96 <
  -8   6   2   798.16   769.47  3904.12 <
  -6   6   2    30.04   195.52    69.38 <
  -4   6   2  7734.38  7562.25   214.44 o
  -2   6   2  3131.67  3298.63    81.99 o
   0   6   2  3465.05  3494.15    88.30 o
   2   6   2  8525.01  8256.04   258.59 o
   4   6   2   552.51   605.48    63.07 o
   6   6   2   416.61   340.58    69.38 o
  -9   7   2    93.57   145.06  3128.34 <
  -7   7   2   729.84   719.01   138.76 o
  -5   7   2     0.36     0.00    44.15 <
  -3   7   2   473.45   592.87    50.46 o
  -1   7   2     0.04     6.31    18.92 <
   1   7   2   104.33   138.76    25.23 o
   3   7   2    76.92    37.84    50.46 <
   5   7   2   436.79   466.73    69.38 o
   7   7   2    11.81    94.61    88.30 <
  -8   8   2  1281.43  2100.28  5701.65 <
  -6   8   2   100.06    88.30    75.69 <
  -4   8   2 10109.50  9290.41   321.66 o
  -2   8   2   492.44   473.04    31.54 o
   0   8   2    96.56    88.30    25.23 o
   2   8   2 11926.90 11403.30   334.28 o
   4   8   2    18.12    25.23    56.76 <
   6   8   2  2064.01  1803.84   113.53 o
  -9   9   2    18.78   119.84  6704.48 <
  -7   9   2    58.20   876.69  5562.89 <
  -5   9   2  1555.13  1696.62   100.91 o
   1   9   2  1616.14  1545.25    63.07 o
   3   9   2   162.02   126.14    50.46 <
   5   9   2  1165.71  1141.59    94.61 o
   7   9   2    92.40     0.00   107.22 <
  -8  10   2   410.10   302.74  2560.70 <
  -6  10   2  1097.31  1210.97   151.37 o
  -4  10   2  1230.94  1318.19    88.30 o
   0  10   2  1938.20  1879.53    69.38 o
   2  10   2   768.79   693.78    63.07 o
   4  10   2   677.85   624.41    63.07 o
   6  10   2     2.56    25.23    63.07 <
  -7  11   2    58.66   485.65   252.29 <
  -5  11   2    99.49    44.15    69.38 <
  -3  11   2   891.75   958.68    75.69 o
  -1  11   2   181.03   157.68    44.15 o
   1  11   2   658.33   599.18    56.76 o
   3  11   2    79.01   107.22    56.76 <
   5  11   2   193.96   113.53    63.07 <
  -8  12   2   119.95   378.43  2882.36 <
  -6  12   2    99.37   170.29   119.84 <
  -4  12   2  1316.14  1242.51   107.22 o
  -2  12   2    72.70    18.92    44.15 <
   0  12   2   125.56   107.22    50.46 <
   2  12   2  2316.43  2478.70   119.84 o
   4  12   2    77.64    25.23    56.76 <
  -7  13   2    78.31   195.52   189.21 <
  -5  13   2   350.37   403.66   100.91 o
  -3  13   2    45.36   157.68    69.38 <
  -1  13   2   215.08   157.68    63.07 <
   1  13   2   235.62   182.91    63.07 <
   3  13   2   102.99    94.61    94.61 <
   5  13   2   643.03   599.18   107.22 o
  -6  14   2  1294.14  1835.38   245.98 o
  -4  14   2    61.32    50.46    88.30 <
   0  14   2   997.63  1103.75    94.61 o
   2  14   2   221.30   214.44   100.91 <
   4  14   2   686.50   618.10   170.29 o
  -5  15   2     9.20    37.84   170.29 <
  -3  15   2   407.64   447.81   107.22 o
  -1  15   2    28.53   195.52    75.69 <
   1  15   2   679.80   573.95   132.45 o
  -4  16   2    67.10    31.54   176.60 <
  -1  17   2     3.64    31.54   145.06 <
  -1 -17   3   183.63   239.67   145.06 <
  -4 -16   3   276.16   548.72   138.76 o
  -2 -16   3    28.54   296.43   119.84 <
   0 -16   3   366.53   321.66   132.45 <
  -5 -15   3     0.17   126.14    69.38 <
  -3 -15   3    46.33   201.83    81.99 <
  -1 -15   3    39.56   208.13    75.69 <
   1 -15   3    82.80    63.07    75.69 <
   3 -15   3    40.51   264.90   170.29 <
  -6 -14   3     8.62    12.61   100.91 <
  -4 -14   3     6.67    81.99    63.07 <
   0 -14   3     1.16   252.29   107.22 <
   2 -14   3   120.94   113.53    75.69 <
   4 -14   3     9.13    37.84    88.30 <
  -7 -13   3    74.76   126.14   107.22 <
  -3 -13   3   381.73   466.73    63.07 o
   1 -13   3    22.63     6.31    63.07 <
   3 -13   3   411.55   353.20    69.38 o
  -8 -12   3   228.28   302.74   113.53 <
  -6 -12   3  1871.59  2112.89   107.22 o
  -4 -12   3   453.46   409.96    56.76 o
  -2 -12   3   103.50   176.60    44.15 o
   0 -12   3   604.49   668.56    63.07 o
   2 -12   3   731.63   687.48    75.69 o
   4 -12   3   247.54   119.84    63.07 <
  -9 -11   3   206.73    12.61   372.12 <
  -7 -11   3   242.97   416.27    69.38 o
  -5 -11   3    16.37    25.23    44.15 <
  -3 -11   3   121.58   176.60    44.15 o
  -1 -11   3   339.03   403.66    44.15 o
   1 -11   3    10.16     6.31    44.15 <
   3 -11   3   269.17   290.13    63.07 o
   5 -11   3    30.69   189.21    69.38 <
  -8 -10   3    60.79   233.36    75.69 o
  -6 -10   3   228.74   163.99    56.76 <
  -4 -10   3    31.19   100.91    44.15 <
  -2 -10   3   225.66   309.05    31.54 o
   0 -10   3   125.87   201.83    44.15 o
   2 -10   3     0.40    18.92    44.15 <
   4 -10   3    14.81    63.07    63.07 <
   6 -10   3     0.01     0.00   100.91 <
  -9  -9   3   237.37   346.89   107.22 o
  -7  -9   3   228.61   327.97    75.69 o
  -5  -9   3   101.72    37.84    44.15 <
  -3  -9   3  2468.70  2535.47    88.30 o
  -1  -9   3   572.61   618.10    37.84 o
   1  -9   3   457.37   428.89    50.46 o
   3  -9   3   456.15   435.19    63.07 o
   5  -9   3   940.06   851.46    88.30 o
  -8  -8   3   207.99   252.29    56.76 o
  -6  -8   3  4563.18  4869.11   170.29 o
  -4  -8   3  1793.95  1841.68    75.69 o
  -2  -8   3   292.21   359.51    31.54 o
   0  -8   3  3690.68  3632.91   100.91 o
   2  -8   3  1424.93  1381.26    75.69 o
   4  -8   3   596.30   529.80    69.38 o
   6  -8   3     0.29    56.76    75.69 <
  -9  -7   3     8.83    18.92    56.76 <
  -7  -7   3   544.45   504.57    56.76 o
  -5  -7   3   419.19   378.43    44.15 o
  -3  -7   3  1581.33  1602.01    56.76 o
  -1  -7   3   798.67   819.93    37.84 o
   1  -7   3   736.07   693.78    31.54 o
   3  -7   3  1687.82  1532.63    88.30 o
   5  -7   3     1.52    12.61    63.07 <
   7  -7   3   163.96   302.74   157.68 <
 -10  -6   3    12.47   119.84   138.76 <
  -8  -6   3   132.07   208.13    50.46 o
  -6  -6   3    70.57   151.37    31.54 o
  -4  -6   3  2027.46  2112.89    69.38 o
  -2  -6   3   120.40   119.84    25.23 o
   0  -6   3    14.63    25.23    18.92 <
   2  -6   3     8.04    18.92    31.54 <
   4  -6   3    28.34    63.07    56.76 <
   6  -6   3     6.41    56.76    56.76 <
  -9  -5   3   385.08   271.21    63.07 o
  -5  -5   3   711.03   693.78    31.54 o
  -3  -5   3  1754.59  1690.31    50.46 o
  -1  -5   3    56.47    63.07    18.92 o
   1  -5   3   179.83   151.37    18.92 o
   3  -5   3  2791.65  2560.70    88.30 o
   5  -5   3   188.99   100.91    63.07 <
   7  -5   3    75.38    63.07    75.69 <
 -10  -4   3     9.16     6.31   113.53 <
  -6  -4   3  6173.68  6231.45   157.68 o
  -4  -4   3   821.30   870.38    31.54 o
  -2  -4   3   507.48   536.11    25.23 o
   0  -4   3  3768.38  3658.14    94.61 o
   2  -4   3  6468.44  6496.35   163.99 o
   4  -4   3  1179.97  1204.66    63.07 o
   6  -4   3    20.30    37.84    69.38 <
  -9  -3   3    59.36   126.14    56.76 <
  -7  -3   3   665.47   611.79    37.84 o
  -5  -3   3  8469.55  8678.62   182.91 o
  -3  -3   3   687.32   668.56    31.54 o
   1  -3   3  2252.94  2232.73    56.76 o
   3  -3   3  2270.18  2257.95    69.38 o
   5  -3   3   656.10   681.17    56.76 o
   7  -3   3    78.29    81.99    63.07 <
 -10  -2   3   539.53   510.88   100.91 o
  -8  -2   3  1763.29  1803.84    69.38 o
  -6  -2   3    26.96    56.76    18.92 <
  -4  -2   3  1389.43  1343.42    37.84 o
  -2  -2   3    73.11    37.84    12.61 o
   0  -2   3    59.56    88.30    12.61 o
   2  -2   3  2565.75  2598.54    69.38 o
   4  -2   3   432.37   479.34    37.84 o
   6  -2   3    13.60    75.69    44.15 <
   8  -2   3    97.91    31.54   119.84 <
 -11  -1   3   343.02   239.67   302.74 <
  -9  -1   3     0.32    12.61    44.15 <
  -7  -1   3   195.85   195.52    25.23 o
  -5  -1   3     2.84    12.61    12.61 <
  -3  -1   3   102.01   119.84    12.61 o
  -1  -1   3   216.94   208.13    18.92 o
   1  -1   3  2731.29  2768.83    69.38 o
   3  -1   3   665.69   668.56    31.54 o
   5  -1   3   273.07   252.29    37.84 o
   7  -1   3    22.35    12.61    56.76 <
 -10   0   3   190.26   233.36    69.38 o
  -6   0   3   443.69   466.73    25.23 o
  -4   0   3 14105.90 13964.00   283.82 o
   2   0   3  1293.05  1311.88    44.15 o
   4   0   3    91.08   113.53    31.54 o
   6   0   3   182.29   126.14    50.46 <
 -11   1   3   993.53  1488.48   315.36 o
  -9   1   3    33.18   107.22    44.15 <
  -7   1   3   113.34    75.69    25.23 o
  -5   1   3  1483.61  1456.95    37.84 o
  -3   1   3  1787.54  1822.76    50.46 o
   1   1   3 10768.30 10633.80   233.36 o
   3   1   3  2593.31  2522.85    75.69 o
   5   1   3  1070.30  1084.83    63.07 o
   7   1   3    31.75    12.61    63.07 <
 -10   2   3   332.99   491.96   100.91 o
  -8   2   3    60.89   126.14    37.84 o
  -6   2   3  3302.19  3386.93    81.99 o
  -4   2   3   995.30  1009.14    31.54 o
  -2   2   3  1701.73  1766.00    44.15 o
   0   2   3   843.89   939.76    37.84 o
   2   2   3   611.61   630.71    31.54 o
   4   2   3    21.78    69.38    31.54 <
   6   2   3   203.76   195.52    69.38 <
  -9   3   3   355.87   548.72    75.69 o
  -7   3   3    15.62    56.76    31.54 <
  -5   3   3  4005.99  3992.42    88.30 o
  -3   3   3    20.88    12.61    18.92 <
   1   3   3   408.11   409.96    25.23 o
   3   3   3     1.81    31.54    25.23 <
   5   3   3   600.35   422.58    63.07 o
   7   3   3   221.06   189.21    75.69 <
 -10   4   3   145.40   163.99   126.14 <
  -8   4   3  1611.26  1576.78    88.30 o
  -6   4   3    70.59    56.76    25.23 <
  -4   4   3   280.65   315.36    18.92 o
   0   4   3  1980.50  1885.83    50.46 o
   2   4   3  5637.00  5689.03   151.37 o
   4   4   3   469.23   416.27    56.76 o
   6   4   3     3.71    25.23    63.07 <
  -9   5   3    75.46   163.99    69.38 <
  -7   5   3  2785.03  2712.07    94.61 o
  -5   5   3  4655.85  4692.51   138.76 o
  -3   5   3  5627.96  5203.38   145.06 o
  -1   5   3   193.13   176.60    18.92 o
   1   5   3   151.49   145.06    18.92 o
   3   5   3  6332.25  6307.13   227.06 o
   5   5   3    87.96   107.22    56.76 <
   7   5   3    37.31    12.61    75.69 <
 -10   6   3  1309.44  1185.74   182.91 o
  -8   6   3    25.33    69.38    50.46 <
  -6   6   3  5522.10  5733.18   195.52 o
  -4   6   3  4556.17  4358.23   126.14 o
  -2   6   3   662.39   693.78    31.54 o
   0   6   3  8934.70  8993.97   220.75 o
   2   6   3   190.86   182.91    50.46 o
   4   6   3  1065.75   939.76    81.99 o
   6   6   3   211.09   220.75    63.07 o
  -9   7   3    50.73    37.84    56.76 <
  -7   7   3   993.09   946.07   100.91 o
  -5   7   3    18.08    12.61    37.84 <
  -3   7   3   495.62   491.96    37.84 o
  -1   7   3     3.19    37.84    25.23 <
   1   7   3   781.00   750.55    44.15 o
   3   7   3    37.96    44.15    44.15 <
   5   7   3    10.47    37.84    56.76 <
   7   7   3     2.85   157.68   145.06 <
  -8   8   3   287.92   353.20    56.76 o
  -6   8   3  2283.01  2194.88   100.91 o
  -4   8   3   392.92   391.04    44.15 o
  -2   8   3  1316.69  1274.04    50.46 o
   0   8   3  2114.42  1961.52    69.38 o
   2   8   3   902.53   819.93    69.38 o
   4   8   3   250.24   264.90    69.38 o
   6   8   3   538.44   504.57   100.91 o
  -9   9   3   758.68   927.15   126.14 o
  -7   9   3   905.17   883.00    94.61 o
  -5   9   3   123.26   163.99    44.15 o
  -3   9   3  4677.42  4528.52   145.06 o
  -1   9   3  2316.90  2302.10    75.69 o
   1   9   3    65.72    81.99    50.46 <
   3   9   3  3563.79  3645.52   145.06 o
   5   9   3     0.08    63.07    56.76 <
  -8  10   3   396.26   403.66    75.69 o
  -6  10   3   900.61   725.32    69.38 o
  -4  10   3    12.32    56.76    44.15 <
  -2  10   3   440.13   454.11    50.46 o
   0  10   3   937.86   933.46    56.76 o
   2  10   3     3.81    18.92    50.46 <
   4  10   3     7.31     0.00    63.07 <
   6  10   3   289.03   353.20   227.06 <
  -7  11   3    85.05    94.61    56.76 <
  -5  11   3   185.90   138.76    50.46 <
  -3  11   3   102.14   157.68    44.15 o
  -1  11   3   124.11   163.99    50.46 o
   1  11   3   889.05   788.39    69.38 o
   3  11   3   227.45   271.21    69.38 o
   5  11   3   296.56   283.82    88.30 o
  -8  12   3   205.47    25.23   195.52 <
  -6  12   3   503.97   460.42    69.38 o
  -4  12   3  1650.49  1671.39   107.22 o
  -2  12   3   406.74   353.20    56.76 o
   0  12   3  1718.54  1702.93    94.61 o
   2  12   3   151.35   113.53    63.07 <
   4  12   3   266.52   132.45    69.38 <
  -7  13   3   562.42   510.88   126.14 o
  -5  13   3    37.85    25.23    69.38 <
  -3  13   3   850.98   826.23    75.69 o
  -1  13   3    92.07   201.83    63.07 o
   1  13   3     8.29    56.76    69.38 <
   3  13   3   813.00   700.09    81.99 o
  -6  14   3    22.70   113.53   195.52 <
  -4  14   3    29.77    12.61    63.07 <
  -2  14   3  1801.56  1753.38   113.53 o
   0  14   3    56.59     0.00    94.61 <
   2  14   3   838.47   889.31   100.91 o
  -5  15   3  1126.99   901.92   214.44 o
  -3  15   3   436.46   466.73    88.30 o
  -1  15   3   480.07   498.26    81.99 o
   1  15   3   752.23   706.40   132.45 o
  -4  16   3     1.08    56.76   145.06 <
  -2  16   3    57.86    94.61    94.61 <
   0  16   3    12.24   290.13   283.82 <
  -4 -16   4   255.76   403.66   151.37 <
  -2 -16   4   314.58   504.57    81.99 o
   0 -16   4     0.01     0.00    94.61 <
  -5 -15   4     9.91    18.92    94.61 <
  -3 -15   4   437.65   447.81    88.30 o
  -1 -15   4   675.04   687.48   119.84 o
   1 -15   4    23.87    56.76    75.69 <
  -6 -14   4   257.80   321.66   119.84 <
  -4 -14   4     9.44    56.76    56.76 <
  -2 -14   4   904.63   927.15    81.99 o
   0 -14   4     5.23    50.46    63.07 <
   2 -14   4   325.43   309.05    88.30 o
  -7 -13   4   216.33   258.59   163.99 <
  -5 -13   4   966.61  1122.67   107.22 o
  -3 -13   4    74.80    69.38    50.46 <
  -1 -13   4    15.37    63.07    63.07 <
   1 -13   4   591.45   643.33    81.99 o
   3 -13   4   542.09   428.89    81.99 o
  -8 -12   4   255.59   157.68   119.84 <
  -6 -12   4   270.01   334.28    63.07 o
  -4 -12   4   193.67   201.83    50.46 o
  -2 -12   4    54.52    81.99    50.46 <
   0 -12   4  1098.93  1166.82    75.69 o
   2 -12   4    36.07    44.15    63.07 <
   4 -12   4     4.24    50.46    75.69 <
  -7 -11   4  3177.78  3046.34   145.06 o
  -5 -11   4   125.00   145.06    56.76 <
  -3 -11   4  1634.61  1646.16    88.30 o
  -1 -11   4  1448.97  1425.41    69.38 o
   1 -11   4    43.70    81.99    50.46 <
   3 -11   4  2092.17  2005.67   113.53 o
   5 -11   4    75.10    75.69   170.29 <
  -8 -10   4    66.24    37.84    56.76 <
  -6 -10   4    63.00   113.53    56.76 <
  -4 -10   4    52.45    37.84    37.84 <
  -2 -10   4  1054.84  1059.60    56.76 o
   0 -10   4    28.26    81.99    50.46 <
   2 -10   4    10.91    31.54    56.76 <
   4 -10   4   102.46   157.68    69.38 <
  -9  -9   4   335.85   220.75   138.76 <
  -7  -9   4  1276.91  1160.51    81.99 o
  -5  -9   4   220.74   271.21    50.46 o
  -3  -9   4  3646.00  3481.54   100.91 o
  -1  -9   4  3740.26  3702.29   107.22 o
   1  -9   4    69.97    94.61    50.46 <
   5  -9   4   123.39   163.99    88.30 <
  -8  -8   4    30.84    12.61    56.76 <
  -6  -8   4  2440.88  2207.50   100.91 o
  -4  -8   4  1557.15  1702.93    69.38 o
  -2  -8   4    31.32    63.07    25.23 <
   0  -8   4  3033.57  2945.43    94.61 o
   2  -8   4   783.51   693.78    63.07 o
   4  -8   4   315.33   309.05    75.69 o
   6  -8   4   800.97   763.16   302.74 <
  -9  -7   4   228.30   245.98    69.38 o
  -7  -7   4   281.75   321.66    50.46 o
  -3  -7   4    31.52    44.15    25.23 <
  -1  -7   4    70.36   119.84    25.23 o
   1  -7   4  4753.15  4692.51   151.37 o
   3  -7   4   184.28   201.83    63.07 o
   5  -7   4   451.30   359.51    81.99 o
 -10  -6   4   110.56    18.92    88.30 <
  -8  -6   4   418.72   353.20    44.15 o
  -6  -6   4   462.84   403.66    44.15 o
  -4  -6   4  1939.24  1873.22    56.76 o
  -2  -6   4  1884.31  1986.75    56.76 o
   0  -6   4  2719.35  2636.38    75.69 o
   2  -6   4   829.76   763.16    69.38 o
   4  -6   4   314.93   340.58    63.07 o
   6  -6   4   528.54   491.96    81.99 o
  -9  -5   4   270.92   145.06    56.76 <
  -7  -5   4  1795.58  1784.92    75.69 o
  -5  -5   4     9.50    18.92    25.23 <
  -3  -5   4   511.65   473.04    31.54 o
  -1  -5   4   678.44   693.78    37.84 o
   1  -5   4    87.66    63.07    25.23 <
   3  -5   4  1808.41  1690.31    94.61 o
   5  -5   4   210.08   201.83    63.07 o
 -10  -4   4   660.20   681.17   107.22 o
  -8  -4   4   731.97   674.86    56.76 o
  -6  -4   4    96.85    69.38    25.23 <
  -4  -4   4  1073.96  1059.60    37.84 o
   0  -4   4  1317.04  1349.73    50.46 o
   2  -4   4     2.40    18.92    25.23 <
   4  -4   4   684.09   649.64    75.69 o
   6  -4   4   191.39   233.36    69.38 o
  -9  -3   4   579.66   643.33    88.30 o
  -7  -3   4   247.88   239.67    31.54 o
  -5  -3   4  8265.73  8016.37   182.91 o
  -3  -3   4  1146.98  1097.44    37.84 o
  -1  -3   4  1130.16  1103.75    37.84 o
   1  -3   4  9921.35  9719.29   233.36 o
   3  -3   4    69.81    31.54    31.54 <
   5  -3   4   660.11   712.71    81.99 o
   7  -3   4   917.08   851.46   208.13 o
 -10  -2   4     7.06     0.00    81.99 <
  -8  -2   4  3733.79  4030.26   113.53 o
  -6  -2   4  2286.17  2194.88    56.76 o
  -4  -2   4  3714.66  3519.38    88.30 o
  -2  -2   4  4022.89  3891.50   100.91 o
   0  -2   4  4667.36  4787.11   113.53 o
   2  -2   4  1596.15  1513.71    50.46 o
   4  -2   4  3029.11  3222.94   100.91 o
   6  -2   4   400.46   397.35    81.99 o
 -11  -1   4     0.07    75.69    81.99 <
  -9  -1   4   100.89   138.76    50.46 <
  -7  -1   4    42.69    75.69    25.23 o
  -5  -1   4   999.32  1053.29    37.84 o
  -3  -1   4    26.08    37.84    25.23 <
  -1  -1   4    58.02    88.30    18.92 o
   1  -1   4  1614.27  1570.48    44.15 o
   3  -1   4     8.35    50.46    37.84 <
   5  -1   4   370.78   340.58    56.76 o
   7  -1   4   157.26     0.00   151.37 <
 -10   0   4     1.70    50.46    56.76 <
  -8   0   4  1301.87  1387.57    50.46 o
  -6   0   4  2948.68  2913.90    69.38 o
  -4   0   4    68.63    56.76    18.92 <
  -2   0   4 25327.20 23790.50   580.26 o
   0   0   4  1186.20  1274.04    37.84 o
   2   0   4  4055.96  3784.28   100.91 o
   4   0   4  2539.11  2598.54    88.30 o
   6   0   4   174.50   182.91    56.76 o
 -11   1   4    76.42   245.98    94.61 <
  -9   1   4   845.33   857.77    63.07 o
  -7   1   4   272.96   271.21    31.54 o
  -5   1   4  4370.96  4251.01   100.91 o
  -3   1   4    18.21    25.23    12.61 <
  -1   1   4   889.75   933.46    31.54 o
   1   1   4  4788.81  4806.04   126.14 o
   3   1   4   383.35   378.43    37.84 o
   5   1   4   653.79   655.94    63.07 o
   7   1   4   278.12   384.73   145.06 <
 -10   2   4   410.21   573.95   100.91 o
  -8   2   4    49.15    75.69    31.54 <
  -6   2   4    38.55    50.46    18.92 <
  -4   2   4  3546.38  3298.63    88.30 o
  -2   2   4  4845.22  4806.04   119.84 o
   0   2   4  1696.52  1658.78    44.15 o
   2   2   4    73.43    75.69    31.54 <
   4   2   4    85.68    69.38    44.15 <
   6   2   4   301.82   428.89    81.99 o
  -9   3   4    61.80   157.68    69.38 <
  -7   3   4   209.49   195.52    31.54 o
  -5   3   4     1.59    12.61    18.92 <
  -3   3   4   317.08   321.66    25.23 o
  -1   3   4   812.00   813.62    37.84 o
   1   3   4   239.21   201.83    25.23 o
   3   3   4   315.58   340.58    37.84 o
   5   3   4     1.17    37.84    56.76 <
 -10   4   4   291.82   498.26    94.61 o
  -8   4   4  2106.88  2112.89    88.30 o
  -6   4   4   509.46   510.88    37.84 o
  -4   4   4   227.12   201.83    25.23 o
  -2   4   4  2663.03  2693.15    75.69 o
   0   4   4   485.89   491.96    31.54 o
   2   4   4    45.16    31.54    31.54 <
   4   4   4  3043.07  2819.29   126.14 o
   6   4   4    20.91   157.68    81.99 <
  -9   5   4     9.15    44.15    50.46 <
  -7   5   4   324.59   290.13    44.15 o
  -5   5   4   249.49   252.29    31.54 o
  -3   5   4   453.20   466.73    31.54 o
  -1   5   4     9.67    25.23    25.23 <
   1   5   4  1336.05  1374.95    56.76 o
   3   5   4    92.92    69.38    56.76 <
   5   5   4   229.90   340.58    81.99 o
 -10   6   4  1408.73  1356.03   132.45 o
  -8   6   4   761.37   782.08    75.69 o
  -6   6   4   440.69   491.96    44.15 o
  -4   6   4  2191.85  2075.05    69.38 o
  -2   6   4   156.38   157.68    25.23 o
   0   6   4  2261.23  2239.03    69.38 o
   2   6   4  2798.42  2712.07   126.14 o
   4   6   4    72.24    81.99    69.38 <
   6   6   4  1092.70   845.16   296.43 <
  -9   7   4     0.05    12.61    56.76 <
  -7   7   4   261.24   258.59    56.76 o
  -5   7   4    47.63    88.30    37.84 <
  -3   7   4    21.11    31.54    25.23 <
  -1   7   4    93.89   119.84    31.54 o
   1   7   4    59.40    37.84    50.46 <
   3   7   4   136.35   119.84    56.76 <
   5   7   4   278.13   271.21    75.69 o
 -10   8   4    57.10    81.99   107.22 <
  -8   8   4    20.45    31.54    63.07 <
  -6   8   4    12.54    37.84    50.46 <
  -4   8   4  2782.11  2636.38    94.61 o
  -2   8   4  1561.86  1576.78    56.76 o
   0   8   4  1696.00  1728.15    75.69 o
   2   8   4   127.03   189.21    56.76 o
   4   8   4    41.69    63.07    56.76 <
  -9   9   4   279.18   277.51   151.37 <
  -7   9   4    90.88    94.61    50.46 <
  -5   9   4   178.40   176.60    50.46 o
  -3   9   4   129.40   189.21    31.54 o
  -1   9   4  1194.86  1274.04    56.76 o
   1   9   4   280.34   271.21    56.76 o
   3   9   4   156.30   151.37    63.07 <
   5   9   4    44.33    63.07   119.84 <
  -8  10   4   158.22   126.14    75.69 <
  -6  10   4   225.89   170.29    56.76 o
  -4  10   4  1621.96  1602.01    75.69 o
  -2  10   4  3640.29  3651.83   113.53 o
   0  10   4   274.05   372.12    63.07 o
   2  10   4     1.34    37.84    63.07 <
   4  10   4   255.09   290.13    81.99 o
  -7  11   4   170.22   170.29    69.38 <
  -5  11   4   138.34   119.84    56.76 <
  -3  11   4     1.35    56.76    44.15 <
  -1  11   4   512.07   536.11    56.76 o
   1  11   4   104.97    69.38    63.07 <
   3  11   4    82.07    44.15    69.38 <
  -6  12   4     0.33    18.92    56.76 <
  -4  12   4     6.25    25.23    56.76 <
  -2  12   4    54.45    88.30    50.46 <
   0  12   4   134.53   182.91    75.69 <
   2  12   4    53.57    37.84    69.38 <
  -7  13   4    18.31     0.00   100.91 <
  -5  13   4     3.63    56.76    69.38 <
  -3  13   4   177.63    75.69    56.76 <
  -1  13   4   163.56   170.29   100.91 <
   1  13   4    49.60   201.83    81.99 <
   3  13   4     0.02    18.92   113.53 <
  -6  14   4   122.79   195.52   309.05 <
  -4  14   4   224.05   208.13    75.69 <
  -2  14   4   746.66   693.78    81.99 o
   0  14   4    23.52    12.61    94.61 <
   2  14   4    14.48    25.23   258.59 <
  -5  15   4     5.88     0.00   277.51 <
  -3  15   4     6.03   100.91    88.30 <
  -1  15   4    44.31    75.69    94.61 <
  -3 -15   5     0.95    25.23    75.69 <
  -1 -15   5   318.16   239.67   132.45 <
  -4 -14   5     1.40    63.07    69.38 <
  -2 -14   5     0.01    31.54   119.84 <
   0 -14   5    69.83    94.61    94.61 <
   2 -14   5    28.39    12.61   126.14 <
  -7 -13   5   415.71   365.81   119.84 o
  -5 -13   5     1.92    63.07    69.38 <
  -3 -13   5    36.38    56.76    56.76 <
  -1 -13   5   433.43   510.88   107.22 o
   1 -13   5   358.21   271.21    75.69 o
  -6 -12   5   329.76   208.13    75.69 <
  -4 -12   5   172.05   145.06    50.46 <
  -2 -12   5   426.07   555.03    81.99 o
   0 -12   5     3.07     0.00    75.69 <
   2 -12   5   134.75   138.76    75.69 <
  -7 -11   5    41.16    37.84    69.38 <
  -5 -11   5   164.58   151.37    63.07 <
  -3 -11   5   209.54   290.13    56.76 o
  -1 -11   5    97.56    94.61    63.07 <
   1 -11   5   379.96   460.42    75.69 o
   3 -11   5     3.37   138.76    88.30 <
  -8 -10   5    85.03     6.31    69.38 <
  -6 -10   5    18.85    25.23    50.46 <
  -4 -10   5     4.31    18.92    37.84 <
  -2 -10   5    26.32    94.61    44.15 <
   0 -10   5    15.24    75.69    69.38 <
   2 -10   5   103.22    37.84    69.38 <
   4 -10   5     5.60     0.00   138.76 <
  -9  -9   5   753.91   864.08   163.99 o
  -7  -9   5    15.39    63.07    50.46 <
  -5  -9   5   985.23   920.84    69.38 o
  -3  -9   5  1130.07  1198.36    63.07 o
  -1  -9   5   572.18   580.26    50.46 o
   1  -9   5   646.53   517.18    75.69 o
   3  -9   5    28.53    18.92    69.38 <
 -10  -8   5     1.52     0.00   245.98 <
  -8  -8   5   357.73   403.66    75.69 o
  -6  -8   5  1422.37  1450.64    94.61 o
  -4  -8   5  1022.51   996.53    56.76 o
  -2  -8   5  2526.30  2466.09    88.30 o
   0  -8   5   164.66   239.67    50.46 o
   2  -8   5    38.35     0.00    56.76 <
   4  -8   5   444.55   359.51    88.30 o
  -9  -7   5   274.16   132.45    63.07 <
  -7  -7   5   458.58   384.73    50.46 o
  -5  -7   5     0.50    31.54    31.54 <
  -3  -7   5   778.35   737.93    44.15 o
  -1  -7   5  1882.03  1822.76    69.38 o
   1  -7   5   275.70   264.90    56.76 o
   3  -7   5     0.01    12.61    56.76 <
   5  -7   5    32.94     0.00   233.36 <
 -10  -6   5   574.47   536.11    88.30 o
  -8  -6   5   146.91   176.60    50.46 o
  -6  -6   5   363.11   290.13    44.15 o
  -4  -6   5  3594.30  3424.77   107.22 o
  -2  -6   5    37.18    18.92    25.23 <
   0  -6   5   510.17   441.50    37.84 o
   2  -6   5   427.19   428.89    75.69 o
   4  -6   5    39.00    56.76    63.07 <
  -9  -5   5   819.87   889.31    69.38 o
  -7  -5   5   159.05   145.06    44.15 o
  -5  -5   5   573.01   624.41    44.15 o
  -3  -5   5  1361.04  1343.42    56.76 o
  -1  -5   5    52.41    44.15    31.54 <
   1  -5   5  2202.09  2005.67    81.99 o
   3  -5   5   278.50   252.29    63.07 o
   5  -5   5     2.25    63.07    75.69 <
 -10  -4   5   356.42   447.81    88.30 o
  -8  -4   5   192.04   245.98    37.84 o
  -6  -4   5  1294.11  1292.96    63.07 o
  -4  -4   5  1237.92  1236.20    56.76 o
  -2  -4   5  1274.51  1248.81    50.46 o
   0  -4   5   334.84   334.28    31.54 o
   2  -4   5  1005.74  1021.76    50.46 o
   4  -4   5   210.87   264.90    69.38 o
   6  -4   5    91.90     0.00   208.13 <
 -11  -3   5   983.85   491.96   208.13 <
  -9  -3   5    13.47    18.92    37.84 <
  -7  -3   5  2763.86  2674.22    81.99 o
  -5  -3   5  5344.02  5014.17   145.06 o
  -3  -3   5    60.23    37.84    25.23 <
  -1  -3   5  7455.66  7625.32   182.91 o
   1  -3   5     0.37    12.61    31.54 <
   3  -3   5   121.33    50.46    44.15 <
   5  -3   5  1228.72  1362.34   107.22 o
 -10  -2   5  3023.11  2907.59   151.37 o
  -8  -2   5   987.87  1059.60    50.46 o
  -6  -2   5   583.24   586.56    37.84 o
  -4  -2   5  6280.59  5878.25   163.99 o
  -2  -2   5    32.18    25.23    18.92 <
   0  -2   5  2798.56  2932.82    75.69 o
   2  -2   5  1307.99  1324.50    63.07 o
   4  -2   5     0.01     6.31    37.84 <
   6  -2   5    74.17    12.61   126.14 <
 -11  -1   5    20.93    31.54    94.61 <
  -9  -1   5    57.84   100.91    44.15 <
  -7  -1   5    88.88   126.14    31.54 o
  -5  -1   5   142.18   176.60    25.23 o
  -1  -1   5   151.32   170.29    25.23 o
   1  -1   5    86.53   100.91    25.23 o
   3  -1   5     1.57    18.92    37.84 <
   5  -1   5   116.31   157.68    56.76 <
 -10   0   5  1865.45  1986.75   126.14 o
  -8   0   5   476.26   523.49    37.84 o
  -6   0   5  1658.27  1696.62    63.07 o
  -4   0   5  8765.33  8394.79   245.98 o
  -2   0   5   477.31   460.42    31.54 o
   0   0   5  1231.03  1179.43    37.84 o
   2   0   5  1824.34  1929.98    63.07 o
   4   0   5     0.46    37.84    44.15 <
   6   0   5   422.11   599.18   145.06 o
 -11   1   5  1479.11  1488.48   138.76 o
  -9   1   5    85.40    75.69    37.84 <
  -7   1   5  1786.12  1829.07    63.07 o
  -5   1   5  2188.72  2068.74    75.69 o
  -3   1   5   864.81   883.00    37.84 o
  -1   1   5  6789.15  6849.55   170.29 o
   1   1   5  1185.75  1292.96    56.76 o
   3   1   5     3.47    37.84    37.84 <
   5   1   5  2291.53  2409.32   138.76 o
 -10   2   5   619.20   536.11    69.38 o
  -8   2   5   342.39   258.59    37.84 o
  -6   2   5     0.17    12.61    25.23 <
  -4   2   5  1231.90  1210.97    50.46 o
  -2   2   5   680.97   668.56    31.54 o
   0   2   5    76.90    94.61    25.23 o
   2   2   5    30.54    37.84    31.54 <
   4   2   5   380.62   378.43    69.38 o
   6   2   5    32.26     0.00   201.83 <
  -9   3   5   479.51   605.48    56.76 o
  -7   3   5   280.80   258.59    37.84 o
  -5   3   5  1647.65  1652.47    63.07 o
  -3   3   5  1215.13  1116.36    50.46 o
  -1   3   5  1679.43  1803.84    69.38 o
   1   3   5   113.55   170.29    37.84 o
   3   3   5  1003.49  1021.76    81.99 o
   5   3   5   229.68   201.83    75.69 <
 -10   4   5   946.86  1040.68   107.22 o
  -8   4   5  1535.43  1532.63    81.99 o
  -6   4   5   120.08    88.30    31.54 <
  -4   4   5  4918.58  5052.01   151.37 o
  -2   4   5     0.44    12.61    25.23 <
   0   4   5  2398.16  2491.32    88.30 o
   2   4   5  1257.97  1261.43    94.61 o
   4   4   5     5.64    37.84    63.07 <
  -9   5   5   904.19   939.76    75.69 o
  -7   5   5    83.54    69.38    44.15 <
  -5   5   5  2080.46  1993.05    75.69 o
  -3   5   5  4466.33  4654.66   138.76 o
  -1   5   5  3479.66  3450.00   107.22 o
   1   5   5  1091.50  1160.51    69.38 o
   3   5   5   445.21   353.20    69.38 o
   5   5   5   284.04   163.99   113.53 <
 -10   6   5   136.59   100.91   132.45 <
  -8   6   5   400.52   485.65    56.76 o
  -6   6   5  5699.68  5884.56   189.21 o
  -4   6   5    20.29    25.23    31.54 <
  -2   6   5  5852.76  6048.54   176.60 o
   0   6   5   561.13   555.03    50.46 o
   2   6   5    60.19    50.46    63.07 <
   4   6   5   922.27   920.84    88.30 o
  -9   7   5   669.97   536.11    75.69 o
  -7   7   5   209.29   138.76    50.46 <
  -5   7   5     0.05    25.23    44.15 <
  -3   7   5  1669.24  1766.00    69.38 o
  -1   7   5    14.47    37.84    31.54 <
   1   7   5  1313.66  1374.95    94.61 o
   3   7   5    70.78   176.60    63.07 <
  -8   8   5   806.40   712.71    75.69 o
  -6   8   5    25.91    12.61    50.46 <
  -4   8   5   197.95   220.75    37.84 o
  -2   8   5   336.23   296.43    44.15 o
   0   8   5   314.89   258.59    75.69 o
   2   8   5   120.84   113.53    69.38 <
   4   8   5   180.28   195.52    94.61 <
  -9   9   5   755.11   605.48   182.91 o
  -7   9   5     7.84    44.15    56.76 <
  -5   9   5    85.45   151.37    50.46 o
  -3   9   5  3261.05  3456.31   119.84 o
  -1   9   5    10.78    18.92    56.76 <
   1   9   5   136.20   119.84    69.38 <
   3   9   5  1425.75  1450.64   126.14 o
  -8  10   5    71.03    56.76   138.76 <
  -6  10   5   275.11   214.44    69.38 o
  -4  10   5   233.84   239.67    44.15 o
  -2  10   5    94.08   113.53    50.46 <
   0  10   5   299.18   290.13    69.38 o
   2  10   5    34.27   170.29    81.99 <
  -7  11   5   128.26    75.69   100.91 <
  -5  11   5    26.08    94.61    56.76 <
  -3  11   5    36.54    69.38    56.76 <
  -1  11   5   220.98   208.13    88.30 <
   1  11   5   209.74    63.07    75.69 <
   3  11   5     3.21     0.00   258.59 <
  -6  12   5   358.48   359.51    75.69 o
  -4  12   5   395.92   391.04    69.38 o
  -2  12   5   721.62   763.16    88.30 o
   0  12   5   100.06    18.92    88.30 <
   2  12   5   179.72   113.53   170.29 <
  -5  13   5    58.86    44.15    63.07 <
  -3  13   5   871.63   901.92   100.91 o
  -1  13   5   224.94   460.42   132.45 o
  -4  14   5   901.39   599.18   126.14 o
  -2  14   5   100.12   245.98   132.45 <
  -4 -14   6   192.78   208.13   145.06 <
  -2 -14   6   281.37   409.96   195.52 <
  -7 -13   6   180.67   208.13   113.53 <
  -5 -13   6   395.54   466.73    88.30 o
  -3 -13   6     7.76    88.30    75.69 <
  -1 -13   6   867.72   927.15   113.53 o
   1 -13   6     2.83    56.76   126.14 <
  -6 -12   6   501.67   523.49    75.69 o
  -4 -12   6    49.93    81.99    56.76 <
  -2 -12   6    72.01    25.23    88.30 <
   0 -12   6   324.12   227.06   100.91 <
  -7 -11   6   762.23   630.71   145.06 o
  -5 -11   6     2.06    18.92    50.46 <
  -3 -11   6  4220.82  4503.29   176.60 o
  -1 -11   6     0.00    88.30    81.99 <
   1 -11   6   794.62   794.70   100.91 o
  -8 -10   6   208.09   239.67   132.45 <
  -6 -10   6   242.44   189.21    63.07 <
  -4 -10   6   327.44   378.43    56.76 o
  -2 -10   6   900.18   857.77    63.07 o
   0 -10   6    71.39    18.92    88.30 <
   2 -10   6   150.36   176.60    88.30 <
  -9  -9   6   158.87   409.96   302.74 <
  -7  -9   6    27.11    37.84    63.07 <
  -5  -9   6   421.79   447.81    56.76 o
  -3  -9   6  1294.70  1318.19    69.38 o
  -1  -9   6   288.70   327.97    56.76 o
   1  -9   6   323.56   353.20    94.61 o
   3  -9   6   447.77   189.21  4749.27 <
  -8  -8   6   122.76    37.84    56.76 <
  -6  -8   6  1562.28  1702.93   107.22 o
  -4  -8   6    76.06    56.76    37.84 <
  -2  -8   6   218.45   227.06    44.15 o
   0  -8   6  1517.97  1318.19   107.22 o
   2  -8   6   115.06   126.14    88.30 <
  -9  -7   6   671.25   599.18    63.07 o
  -7  -7   6    12.04    12.61    37.84 <
  -5  -7   6  1095.17  1116.36    56.76 o
  -3  -7   6  3339.60  3531.99   113.53 o
  -1  -7   6   696.61   630.71    56.76 o
   1  -7   6    65.60   176.60    88.30 <
   3  -7   6   381.74   302.74  3450.00 <
 -10  -6   6    28.85   245.98   132.45 <
  -8  -6   6    91.52   163.99    50.46 o
  -6  -6   6     7.18    37.84    31.54 <
  -4  -6   6    59.59    75.69    31.54 <
  -2  -6   6    74.41    63.07    37.84 <
   0  -6   6   159.21   163.99    44.15 o
   2  -6   6     1.99    50.46    63.07 <
  -9  -5   6    84.82   107.22    50.46 <
  -7  -5   6   190.22   182.91    37.84 o
  -5  -5   6    46.62    94.61    31.54 <
  -3  -5   6   155.88   182.91    31.54 o
  -1  -5   6     2.07    44.15    37.84 <
   1  -5   6   213.33   176.60    44.15 o
   3  -5   6   366.38   485.65  2939.12 <
 -10  -4   6   102.56    56.76    56.76 <
  -8  -4   6   158.44   163.99    44.15 o
  -6  -4   6  1222.48  1274.04    63.07 o
  -4  -4   6   137.18   138.76    37.84 o
  -2  -4   6   370.96   346.89    37.84 o
   0  -4   6  1221.89  1192.05    63.07 o
   2  -4   6    29.33    12.61    44.15 <
   4  -4   6    25.56    50.46  2415.63 <
 -11  -3   6   989.44  1154.21   182.91 o
  -9  -3   6   844.00   769.47    56.76 o
  -7  -3   6     0.12    12.61    31.54 <
  -5  -3   6  3511.13  3487.84   113.53 o
  -3  -3   6  2099.26  2037.20    75.69 o
  -1  -3   6  3273.82  3374.32    88.30 o
   1  -3   6   389.05   359.51    44.15 o
   3  -3   6   510.94   605.48    75.69 o
 -10  -2   6    25.95    31.54    50.46 <
  -8  -2   6   707.85   719.01    44.15 o
  -6  -2   6   123.72   119.84    31.54 o
  -4  -2   6   405.75   447.81    37.84 o
  -2  -2   6   475.04   466.73    37.84 o
   0  -2   6   338.24   346.89    37.84 o
   2  -2   6   576.23   637.02    56.76 o
   4  -2   6   506.11   498.26   119.84 o
 -11  -1   6    23.86    12.61    81.99 <
  -9  -1   6   284.27   340.58    44.15 o
  -7  -1   6   164.40   119.84    31.54 o
  -5  -1   6    91.75    63.07    25.23 <
  -3  -1   6    78.83    88.30    31.54 <
  -1  -1   6    58.95    63.07    25.23 <
   1  -1   6    92.32    81.99    37.84 <
   3  -1   6   140.93   107.22    50.46 <
   5  -1   6    69.62   214.44  2560.70 <
 -10   0   6    20.13    75.69    50.46 <
  -8   0   6   288.07   290.13    37.84 o
  -6   0   6    43.99    37.84    31.54 <
  -4   0   6   561.26   592.87    37.84 o
  -2   0   6  1556.86  1639.85    63.07 o
   0   0   6    21.69    50.46    37.84 <
   2   0   6   729.44   883.00    63.07 o
   4   0   6    84.79   126.14   119.84 <
  -9   1   6   429.59   353.20    44.15 o
  -7   1   6   151.15   126.14    31.54 o
  -5   1   6  1782.18  1709.23    69.38 o
  -3   1   6  7042.18  7013.53   195.52 o
  -1   1   6   617.44   605.48    37.84 o
   1   1   6     0.10    12.61    31.54 <
   3   1   6   579.49   744.24    75.69 o
 -10   2   6   265.05   372.12    63.07 o
  -8   2   6   148.98   208.13    37.84 o
  -6   2   6   810.09   813.62    50.46 o
  -4   2   6    12.20    56.76    31.54 <
  -2   2   6   319.47   302.74    31.54 o
   0   2   6   519.69   573.95    50.46 o
   2   2   6     1.11    37.84    37.84 <
   4   2   6    64.67    56.76  2321.02 <
  -9   3   6     9.18    44.15    50.46 <
  -7   3   6    51.48    12.61    31.54 <
  -5   3   6   612.20   573.95    44.15 o
  -3   3   6   981.15  1009.14    50.46 o
  -1   3   6    87.61    31.54    44.15 <
   1   3   6    87.84    94.61    37.84 <
   3   3   6     4.49    25.23  2819.29 <
 -10   4   6     6.00    12.61    56.76 <
  -8   4   6   155.72   201.83    44.15 o
  -6   4   6     8.55    12.61    31.54 <
  -4   4   6    18.51    18.92    31.54 <
  -2   4   6   130.06   119.84    37.84 o
   0   4   6     0.01    18.92    37.84 <
   2   4   6   144.66   126.14    69.38 <
  -9   5   6   705.73   700.09    69.38 o
  -7   5   6    56.62    37.84    31.54 <
  -5   5   6   146.10   100.91    31.54 o
  -3   5   6   670.63   719.01    50.46 o
  -1   5   6    48.22    37.84    44.15 <
   1   5   6   249.26   372.12    88.30 o
   3   5   6  1188.80  1576.78  3317.55 <
 -10   6   6    75.33   252.29   252.29 <
  -8   6   6   357.41   296.43    56.76 o
  -6   6   6   644.50   618.10    56.76 o
  -4   6   6   319.86   365.81    44.15 o
  -2   6   6    41.88   100.91    37.84 <
   0   6   6  1525.96  1595.70    94.61 o
   2   6   6   127.12   201.83    88.30 <
  -9   7   6    74.61   107.22   132.45 <
  -7   7   6     0.03     6.31    50.46 <
  -5   7   6    78.13    37.84    37.84 <
  -3   7   6     5.05    25.23    44.15 <
  -1   7   6     0.12    75.69    44.15 <
   1   7   6   153.35   233.36    88.30 <
   3   7   6   222.72   214.44  4560.06 <
  -8   8   6     0.04    31.54    63.07 <
  -6   8   6   261.52   208.13    50.46 o
  -4   8   6   108.41   176.60    50.46 o
  -2   8   6     1.46    12.61    44.15 <
   0   8   6   369.13   466.73    94.61 o
   2   8   6    19.75    18.92    88.30 <
  -7   9   6    56.94    12.61    63.07 <
  -5   9   6   896.36   819.93    63.07 o
  -3   9   6   765.86   857.77    69.38 o
  -1   9   6    81.70    75.69    81.99 <
   1   9   6    10.10    69.38    69.38 <
  -6  10   6   451.84   384.73    63.07 o
  -4  10   6     3.45    12.61    56.76 <
  -2  10   6   619.08   605.48    88.30 o
   0  10   6   397.38   309.05    94.61 o
  -7  11   6   222.35   409.96   113.53 o
  -5  11   6   477.49   359.51    63.07 o
  -3  11   6   665.35   605.48    69.38 o
  -1  11   6     0.11     0.00    81.99 <
   1  11   6     1.83     0.00   126.14 <
  -4  12   6     0.23    56.76    63.07 <
  -2  12   6    21.02    44.15   100.91 <
  -3  13   6     0.17     0.00   151.37 <
  -5 -13   7    24.10    12.61   151.37 <
  -6 -12   7     6.17     0.00    94.61 <
  -4 -12   7     1.11     6.31    63.07 <
  -2 -12   7   400.40   466.73   113.53 o
  -7 -11   7    70.47   126.14   107.22 <
  -5 -11   7  1521.02  1551.55   107.22 o
  -3 -11   7     0.57   176.60    69.38 <
  -1 -11   7   380.89   491.96  2188.58 <
  -6 -10   7   435.51   479.34    56.76 o
  -4 -10   7    28.30    94.61    56.76 <
  -2 -10   7   187.79   151.37    63.07 <
   0 -10   7    54.57   460.42  2932.82 <
  -7  -9   7     5.53    56.76    50.46 <
  -5  -9   7   815.07   731.63    75.69 o
  -3  -9   7     3.80    37.84    50.46 <
  -1  -9   7     0.15    12.61  2440.86 <
   1  -9   7   110.95   315.36  2649.00 <
  -8  -8   7  1257.60  1173.13   138.76 o
  -6  -8   7   107.06   113.53    50.46 <
  -4  -8   7    53.77    69.38    44.15 <
   0  -8   7    22.97    88.30  2112.89 <
   2  -8   7   282.65   485.65  4906.95 <
  -9  -7   7   115.50    63.07    63.07 <
  -7  -7   7   139.39   176.60    50.46 o
  -5  -7   7  2588.78  2693.15    88.30 o
  -3  -7   7   190.12   189.21    50.46 o
  -1  -7   7    55.12    37.84    56.76 <
   1  -7   7   510.91  2030.90  3462.62 <
  -8  -6   7    40.33    56.76    44.15 <
  -6  -6   7   234.10   170.29    37.84 o
  -4  -6   7   907.54   889.31    50.46 o
  -2  -6   7    78.03    75.69    50.46 <
   0  -6   7   264.99   321.66   119.84 <
   2  -6   7   100.96     0.00  2220.11 <
  -9  -5   7   315.10   233.36    56.76 o
  -7  -5   7   401.74   340.58    50.46 o
  -5  -5   7   382.93   384.73    44.15 o
  -3  -5   7   621.14   599.18    44.15 o
  -1  -5   7   340.24   454.11    56.76 o
 -10  -4   7    25.06    94.61    94.61 <
  -8  -4   7   891.91   927.15    69.38 o
  -6  -4   7   158.56   119.84    44.15 <
  -4  -4   7    10.68    37.84    37.84 <
  -2  -4   7   657.28   643.33    50.46 o
   0  -4   7   140.58   100.91    81.99 <
   2  -4   7     3.46    12.61    88.30 <
  -9  -3   7   101.15   182.91    50.46 o
  -7  -3   7  2457.02  2302.10    88.30 o
  -5  -3   7     2.93    18.92    31.54 <
  -3  -3   7  1196.25  1261.43    63.07 o
  -1  -3   7   718.16   857.77    63.07 o
   1  -3   7   224.23   126.14    75.69 <
   3  -3   7   773.35  1021.76  5102.47 <
 -10  -2   7  1741.51  1892.14   107.22 o
  -8  -2   7    18.28    50.46    37.84 <
  -6  -2   7   860.31   845.16    56.76 o
  -4  -2   7  1663.81  1602.01    69.38 o
  -2  -2   7     5.31    18.92    31.54 <
   0  -2   7  1421.79  1778.61   132.45 o
   2  -2   7   298.06   290.13    88.30 o
  -9  -1   7   115.36    63.07    37.84 <
  -7  -1   7    18.41    50.46    44.15 <
  -5  -1   7    13.57    37.84    37.84 <
  -3  -1   7     9.98    50.46    31.54 <
  -1  -1   7    32.71    37.84    37.84 <
   1  -1   7    11.95    25.23    69.38 <
   3  -1   7     9.77    69.38    88.30 <
 -10   0   7   723.40   700.09    69.38 o
  -8   0   7    77.17    88.30    44.15 <
  -6   0   7  1579.43  1526.33    75.69 o
  -4   0   7  1649.51  1690.31    69.38 o
  -2   0   7   149.35   170.29    31.54 o
   0   0   7   665.78   996.53   126.14 o
   2   0   7   286.13   340.58    88.30 o
  -9   1   7     0.04    56.76    37.84 <
  -7   1   7  1571.00  1532.63    75.69 o
  -5   1   7   193.94   201.83    37.84 o
  -3   1   7   282.93   290.13    37.84 o
  -1   1   7  1852.51  1942.60    88.30 o
   3   1   7   864.15  1740.77  5064.63 <
 -10   2   7   285.89   447.81    63.07 o
  -8   2   7   765.92   870.38    63.07 o
  -6   2   7   197.98   201.83    44.15 o
  -4   2   7    77.46    56.76    31.54 <
  -2   2   7   767.38   769.47    50.46 o
   0   2   7     0.12    37.84    81.99 <
   2   2   7    18.93    37.84    88.30 <
  -9   3   7   446.22   485.65    56.76 o
  -7   3   7   166.36   201.83    44.15 o
  -5   3   7  1410.55  1387.57    69.38 o
  -3   3   7  1085.01  1103.75    56.76 o
  -1   3   7   134.26   151.37    44.15 o
   1   3   7   630.74   391.04   126.14 o
 -10   4   7   728.50   845.16   138.76 o
  -8   4   7   378.92   340.58    50.46 o
  -6   4   7   521.41   485.65    44.15 o
  -4   4   7   998.92   939.76    50.46 o
  -2   4   7    83.12    88.30    44.15 <
   2   4   7    99.26     0.00  2131.81 <
  -9   5   7   907.68  1046.98    94.61 o
  -7   5   7   757.10   756.86    63.07 o
  -5   5   7   828.21   933.46    56.76 o
  -3   5   7    50.56    94.61    37.84 <
  -1   5   7    93.29    94.61    50.46 <
   1   5   7  1291.90   618.10  3330.17 <
  -8   6   7  2156.75  2415.63   107.22 o
  -6   6   7  1279.46  1160.51    69.38 o
  -4   6   7   531.65   523.49    56.76 o
   0   6   7    23.56     0.00  2030.90 <
   2   6   7   551.10   674.86  4711.43 <
  -7   7   7   223.34   227.06    63.07 o
  -5   7   7   912.60   952.38    69.38 o
  -3   7   7    97.49   107.22    50.46 <
  -1   7   7    33.09    31.54  2346.25 <
   1   7   7   640.83   788.39  2541.77 <
  -8   8   7   267.25   447.81   126.14 o
  -6   8   7     6.93    50.46    56.76 <
  -4   8   7   393.90   435.19    56.76 o
  -2   8   7    63.46   126.14    50.46 <
   0   8   7   359.45   365.81  2812.98 <
  -7   9   7     9.68    88.30    81.99 <
  -5   9   7   733.22   857.77    81.99 o
  -3   9   7  1053.36  1059.60    88.30 o
  -1   9   7    20.70   113.53  2100.28 <
  -6  10   7     2.55    63.07    88.30 <
  -4  10   7    31.82    94.61    56.76 <
  -2  10   7   296.00   315.36   100.91 o
  -5  11   7    50.52   126.14   163.99 <
  -5 -11   8   511.69   384.73  3134.65 <
  -6 -10   8    36.46    75.69   170.29 <
  -4 -10   8     0.19     0.00   132.45 <
  -2 -10   8   120.79     0.00  2869.75 <
  -7  -9   8   125.02   100.91   119.84 <
  -5  -9   8   334.21   340.58    88.30 o
  -3  -9   8   313.91   359.51    81.99 o
  -8  -8   8   126.46    12.61   182.91 <
  -6  -8   8   173.42   189.21    63.07 <
  -4  -8   8    70.09    69.38    75.69 <
  -2  -8   8   115.41    44.15    88.30 <
  -7  -7   8  1038.20   889.31    75.69 o
  -5  -7   8    58.95    63.07    69.38 <
  -3  -7   8   161.05   163.99    75.69 <
  -1  -7   8   863.30  1431.72   201.83 o
  -8  -6   8    52.27    37.84    56.76 <
  -6  -6   8    10.90    25.23    37.84 <
  -4  -6   8    87.07     0.00    94.61 <
  -2  -6   8    46.81     0.00    69.38 <
   0  -6   8     0.01    12.61   107.22 <
  -9  -5   8     3.10   227.06   245.98 <
  -7  -5   8   167.72   189.21    44.15 o
  -5  -5   8    48.64    56.76    44.15 <
  -3  -5   8     0.12     0.00    69.38 <
  -1  -5   8    99.86    94.61    88.30 <
   1  -5   8    99.90     0.00  2529.16 <
  -8  -4   8     0.13    31.54    50.46 <
  -6  -4   8   412.86   435.19    56.76 o
  -2  -4   8   452.30   510.88    69.38 o
   0  -4   8    86.05    94.61    88.30 <
  -9  -3   8  1024.61   889.31    69.38 o
  -7  -3   8  1596.95  1595.70    81.99 o
  -5  -3   8     0.20    50.46    44.15 <
   1  -3   8   215.62   277.51    75.69 o
 -10  -2   8   132.77   271.21   227.06 <
  -8  -2   8   152.36   157.68    44.15 o
  -6  -2   8     7.55    12.61    37.84 <
  -2  -2   8    59.39    44.15    56.76 <
   0  -2   8    92.03    37.84    63.07 <
  -9  -1   8   538.96   561.34    63.07 o
  -7  -1   8   125.99    56.76    44.15 <
  -5  -1   8    71.02    69.38    56.76 <
  -3  -1   8    62.99    56.76    50.46 <
  -1  -1   8    52.76   157.68    81.99 <
   1  -1   8   140.43    69.38    81.99 <
 -10   0   8     1.20     0.00   176.60 <
  -8   0   8    13.65    56.76    44.15 <
  -6   0   8    50.21    75.69    44.15 <
  -4   0   8   231.32     0.00    81.99 <
  -2   0   8    24.13    37.84    56.76 <
   0   0   8     5.70    75.69    69.38 <
  -9   1   8   736.79   763.16    63.07 o
  -7   1   8   668.01   744.24    63.07 o
  -5   1   8   166.62   138.76    50.46 <
  -3   1   8   860.66   838.85    75.69 o
  -1   1   8   745.48   567.64   176.60 o
   1   1   8   492.05   561.34    88.30 o
  -8   2   8    57.76   113.53    50.46 <
  -6   2   8    80.10   100.91    44.15 <
  -2   2   8    78.12    56.76    69.38 <
   0   2   8     1.31    25.23    88.30 <
  -9   3   8    63.66   189.21   151.37 <
  -7   3   8   864.17   788.39    56.76 o
  -5   3   8    15.27    25.23    44.15 <
  -3   3   8    73.67    75.69    69.38 <
  -1   3   8   416.61   580.26    88.30 o
   1   3   8    35.80   182.91  2428.25 <
  -8   4   8     1.81     6.31    50.46 <
  -6   4   8    11.22    25.23    44.15 <
  -4   4   8     2.48   214.44    94.61 <
  -2   4   8    24.39    81.99    69.38 <
   0   4   8     0.10     6.31   100.91 <
  -7   5   8   312.75   309.05    50.46 o
  -5   5   8     1.58     0.00    63.07 <
  -3   5   8    69.48    75.69    75.69 <
  -1   5   8   702.16   933.46   195.52 o
  -8   6   8   188.35     0.00   170.29 <
  -6   6   8     1.93     6.31    63.07 <
  -4   6   8    24.01    56.76    75.69 <
  -2   6   8    25.64    94.61    88.30 <
  -7   7   8   426.92   258.59   107.22 <
  -5   7   8    80.23    75.69    88.30 <
  -3   7   8     0.30     0.00    81.99 <
  -6   8   8    24.08     0.00   100.91 <
  -4   8   8    31.48    37.84   126.14 <
  -2   8   8     3.59     0.00  2989.58 <
  -5   9   8   125.42   107.22  3014.81 <
  -4  -8   9   696.47   498.26   258.59 <
  -7  -7   9   351.35     0.00  3601.37 <
  -5  -7   9   271.61   100.91  2421.94 <
  -3  -7   9   232.78   157.68   126.14 <
  -6  -6   9   902.48   555.03  2346.25 <
  -4  -6   9   165.37   100.91   132.45 <
  -2  -6   9     0.08   100.91   107.22 <
  -7  -5   9   184.61   365.81    94.61 o
  -3  -5   9   645.67   693.78    81.99 o
  -1  -5   9   247.39   227.06   214.44 <
  -6  -4   9    64.23   233.36   113.53 <
  -4  -4   9   169.45   119.84    63.07 <
  -2  -4   9    98.18    69.38    56.76 <
  -7  -3   9   278.99   315.36    81.99 o
  -5  -3   9   150.44   126.14    81.99 <
  -3  -3   9  1319.93  1526.33   100.91 o
  -1  -3   9     1.34   100.91   100.91 <
  -6  -2   9  1364.17  1299.27   145.06 o
  -4  -2   9   705.00   870.38    63.07 o
  -2  -2   9    81.11   145.06    63.07 <
  -7  -1   9     2.83    18.92    88.30 <
  -5  -1   9    15.06    88.30    75.69 <
  -3  -1   9    65.84    56.76    44.15 <
  -1  -1   9    13.82    56.76    94.61 <
  -2   0   9   173.50   201.83    69.38 <
  -7   1   9   160.57   126.14    88.30 <
  -5   1   9     5.44   182.91    81.99 <
  -3   1   9  1212.76  1368.65    94.61 o
  -1   1   9    61.49     0.00   107.22 <
  -6   2   9   812.97   832.54   119.84 o
  -4   2   9    36.69   119.84    63.07 <
  -2   2   9    97.67   107.22    75.69 <
  -7   3   9   187.36     0.00    94.61 <
  -5   3   9   520.70   466.73   151.37 o
  -3   3   9    17.87    75.69    63.07 <
  -1   3   9   174.40   498.26   145.06 o
  -6   4   9   362.89  1192.05  2447.17 <
  -4   4   9   242.79   561.34   132.45 o
  -2   4   9   355.08   277.51    94.61 <
  -7   5   9    66.17     0.00  3456.31 <
  -5   5   9   122.00   391.04  2321.02 <
  -3   5   9   233.01   340.58   132.45 <
  -5  -1  10   405.83   119.84   157.68 <

#===============================================================================
data_albite_film
#===============================================================================

# 1. CHEMICAL DATA

_chemical_name_mineral                   albite
_chemical_formula_sum                    'Na1 Al1 Si3 O8'
_chemical_formula_weight                 262.2
_chemical_compound_source                'Harts Range, Australia'

#===============================================================================

# 2. CRYSTAL DATA

_space_group_crystal_system              triclinic
_space_group_name_H-M_alt                'C-1'
_space_group_name_Hall                   -C
_space_group_IT_number                   2

loop_
 _space_group_symop_id
 _space_group_symop_operation_xyz
 1   x,y,z
 2   -x,-y,-z
 3   x+1/2,y+1/2,z
 4   -x+1/2,-y+1/2,-z

_cell_length_a                           8.087(2)
_cell_length_b                           12.9971(15)
_cell_length_c                           7.2164(14)
_cell_angle_alpha                        91.910(15)
_cell_angle_beta                         116.71(3)
_cell_angle_gamma                        90.01(2)
_cell_volume                             677.1(3)
_cell_formula_units_Z                    4
_cell_measurement_reflns_used            439
_cell_measurement_theta_min              5.55
_cell_measurement_theta_max              22.09
_cell_special_details
;
The unit cell is indexed and refined with the other domains using CrysAlis Pro,
which allows simultaneous indexing and refinemnet of multiple domains.
Then the fixed unit cells are used to integrate the peaks from all domains in 
APEX3. A fixed box size of of 0.3??0.3??0.3 was used for the integration, which
provides better results than the larger box sizes. The "Minium Common Volume" 
was set to 0.001% for twin overlap determination. The HKLF4 file, created with 
intensities from both Pericline-twin domains, is used for structure refinement. 
;
_cell_measurement_temperature            100
_exptl_crystal_description               'thin film'
_exptl_crystal_density_diffrn            2.5722
_exptl_crystal_F_000                     520
_exptl_absorpt_coefficient_mu            0.907

#===============================================================================

# 3. EXPERIMENTAL DATA

_diffrn_ambient_temperature              100
_diffrn_source                           'Mo microfocus Rotating Anode'
_diffrn_source_power                     2.5
_diffrn_source_voltage                   50
_diffrn_source_current                   50
_diffrn_radiation_type                   'Mo K\a'
_diffrn_radiation_wavelength             0.71073
_diffrn_radiation_monochromator          graphite
_diffrn_measurement_device               'four-circle diffractometer'
_diffrn_measurement_device_type          'Bruker CCD'
_diffrn_detector                         'APEX II'
_diffrn_detector_area_resol_mean         16.67
_diffrn_measurement_method               '5\w and 1\f scans'
_diffrn_measurement_specimen_support     'MiTeGen MicroMount 50'
_diffrn_reflns_number                    3152
_diffrn_reflns_theta_min                 3.14
_diffrn_reflns_theta_max                 28.73
_diffrn_reflns_theta_full                28.08
_diffrn_measured_fraction_theta_max      0.94
_diffrn_measured_fraction_theta_full     0.98
_diffrn_reflns_av_R_equivalents          0.2751
_diffrn_reflns_av_unetI/netI             1.2921
_diffrn_reflns_limit_h_min               -10
_diffrn_reflns_limit_h_max               10
_diffrn_reflns_limit_k_min               -16
_diffrn_reflns_limit_k_max               17
_diffrn_reflns_limit_l_min               -9
_diffrn_reflns_limit_l_max               9
_diffrn_radiation_probe                  X-ray

#===============================================================================

# 4. REFINEMENT DATA

_refine_special_details
; 
The Al occupancies of the tetrahedral sites are calculated following equation: 
Occ_Al=0.25(1+n_An)+(<T_i-O>-<<T-O>>)/0.135 (Kroll and Ribbe 1983).
The not matching reflections with |F(obs)-F(cal)|>3*sig(F(obs)) are skipped in 
the refinement.
;
_reflns_number_total                     1444
_reflns_number_gt                        756
_reflns_threshold_expression             'I>3\s(I)'
_refine_ls_structure_factor_coef         Fsqd
_refine_ls_R_factor_gt                   0.0544
_refine_ls_wR_factor_gt                  0.0955
_refine_ls_R_factor_all                  0.2203
_refine_ls_wR_factor_ref                 0.1124
_refine_ls_goodness_of_fit_ref           1.10
_refine_ls_goodness_of_fit_gt            1.33
_refine_ls_number_reflns                 1444
_refine_ls_number_parameters             118
_refine_ls_number_restraints             0
_refine_ls_number_constraints            36
_refine_ls_weighting_scheme              sigma
_refine_ls_weighting_details             'w=1/(\s^2^(I)+0.0004I^2^)'
_refine_ls_shift/su_max                  0.0064
_refine_ls_shift/su_mean                 0.0019
_refine_diff_density_max                 4.34
_refine_diff_density_min                 -2.88
_refine_ls_extinction_method             'none'

loop_
 _atom_type_symbol
 _atom_type_scat_dispersion_real
 _atom_type_scat_dispersion_imag
 _atom_type_scat_source
 Al   0.0645  0.0514
 'International Tables Vol C tables 4.2.6.8 and 6.1.1.1'
 Na   0.0362  0.0249
 'International Tables Vol C tables 4.2.6.8 and 6.1.1.1'
 O    0.0106  0.0060
 'International Tables Vol C tables 4.2.6.8 and 6.1.1.1'
 Si   0.0817  0.0704
 'International Tables Vol C tables 4.2.6.8 and 6.1.1.1'

#===============================================================================

# 5. ATOMIC COORDINATES AND DISPLACEMENT PARAMETERS

loop_
 _atom_site_label
 _atom_site_type_symbol
 _atom_site_fract_x
 _atom_site_fract_y
 _atom_site_fract_z
 _atom_site_adp_type
 _atom_site_U_iso_or_equiv
 _atom_site_site_symmetry_multiplicity
 _atom_site_occupancy
 _atom_site_calc_flag
 _atom_site_refinement_flags
 _atom_site_disorder_assembly
 _atom_site_disorder_group
  Mna Na 0.7363(3) -0.0032(2) -0.1315(4) Uani 0.0602(12) 4 1 d . . .
  T1osi Si -0.00785(17) -0.16916(10) -0.2187(2) Uani 0.0173(5) 4 0.613 d . . .
  T1oal Al -0.00785(17) -0.16916(10) -0.2187(2) Uani 0.0173(5) 4 0.387 d . . .
  T1msi Si 0.49451(17) -0.31901(10) -0.2258(2) Uani 0.0173(5) 4 0.6322 d . . .
  T1mal Al 0.49451(17) -0.31901(10) -0.2258(2) Uani 0.0173(5) 4 0.3678 d . . .
  T2osi Si 0.31283(17) -0.11007(9) -0.3289(2) Uani 0.0174(5) 4 0.8841 d . . .
  T2oal Al 0.31283(17) -0.11007(9) -0.3289(2) Uani 0.0174(5) 4 0.1159 d . . .
  T2msi Si 0.31778(16) 0.11899(10) -0.3474(2) Uani 0.0171(5) 4 0.8707 d . . .
  T2mal Al 0.31778(16) 0.11899(10) -0.3474(2) Uani 0.0171(5) 4 0.1293 d . . .
  Oa1 O 0.5023(4) -0.3658(2) -0.0097(5) Uani 0.0252(14) 4 1 d . . .
  Oa2 O 0.4128(4) 0.0058(2) -0.2823(5) Uani 0.0209(13) 4 1 d . . .
  Obo O 0.1807(4) -0.1145(2) -0.2131(5) Uani 0.0263(15) 4 1 d . . .
  Obm O 0.6839(4) -0.3572(2) -0.2382(5) Uani 0.0249(14) 4 1 d . . .
  Oco O 0.4872(4) 0.2037(2) -0.2635(5) Uani 0.0254(15) 4 1 d . . .
  Ocm O 0.4819(4) -0.1905(2) -0.2311(5) Uani 0.0240(14) 4 1 d . . .
  Odo O 0.1995(4) 0.1174(2) -0.6019(5) Uani 0.0222(13) 4 1 d . . .
  Odm O 0.1949(4) -0.1274(3) -0.5789(5) Uani 0.0256(14) 4 1 d . . .

loop_
 _atom_site_aniso_label
 _atom_site_aniso_type_symbol
 _atom_site_aniso_U_11
 _atom_site_aniso_U_22
 _atom_site_aniso_U_33
 _atom_site_aniso_U_12
 _atom_site_aniso_U_13
 _atom_site_aniso_U_23
 Mna Na 0.0082(11) 0.099(2) 0.0542(19) 0.0027(10) -0.0006(11) -0.0388(13)
 T1osi Si 0.0085(7) 0.0353(8) 0.0068(7) -0.0028(5) 0.0023(5) 0.0009(5)
 T1oal Al 0.0085(7) 0.0353(8) 0.0068(7) -0.0028(5) 0.0023(5) 0.0009(5)
 T1msi Si 0.0078(6) 0.0364(8) 0.0065(7) 0.0020(5) 0.0020(5) 0.0031(5)
 T1mal Al 0.0078(6) 0.0364(8) 0.0065(7) 0.0020(5) 0.0020(5) 0.0031(5)
 T2osi Si 0.0072(6) 0.0333(8) 0.0093(7) -0.0007(5) 0.0014(5) 0.0035(5)
 T2oal Al 0.0072(6) 0.0333(8) 0.0093(7) -0.0007(5) 0.0014(5) 0.0035(5)
 T2msi Si 0.0087(6) 0.0350(8) 0.0083(7) -0.0010(5) 0.0043(5) 0.0016(5)
 T2mal Al 0.0087(6) 0.0350(8) 0.0083(7) -0.0010(5) 0.0043(5) 0.0016(5)
 Oa1 O 0.0162(17) 0.041(2) 0.015(2) -0.0001(13) 0.0040(14) 0.0040(14)
 Oa2 O 0.0066(17) 0.041(2) 0.0098(18) -0.0020(12) -0.0014(13) 0.0049(13)
 Obo O 0.0194(18) 0.039(2) 0.025(2) 0.0011(13) 0.0137(15) 0.0022(14)
 Obm O 0.0121(17) 0.042(2) 0.020(2) 0.0005(13) 0.0077(14) -0.0057(14)
 Oco O 0.0168(19) 0.046(2) 0.012(2) 0.0001(14) 0.0058(14) 0.0005(14)
 Ocm O 0.0131(17) 0.048(2) 0.0056(19) 0.0032(13) -0.0009(13) 0.0061(13)
 Odo O 0.0107(16) 0.037(2) 0.0156(19) 0.0011(12) 0.0023(13) 0.0042(13)
 Odm O 0.0132(17) 0.042(2) 0.0148(19) -0.0027(13) -0.0001(13) -0.0004(13)

#===============================================================================

# 6. MOLECULAR GEOMETRY

loop_
 _geom_bond_atom_site_label_1
 _geom_bond_atom_site_label_2
 _geom_bond_site_symmetry_1
 _geom_bond_site_symmetry_2
 _geom_bond_distance
 _geom_bond_publ_flag
  T1osi Oa1 . 4_545 1.675(4) y
  T1osi Obo . .     1.665(4) y
  T1osi Oco . 3_445 1.670(3) y
  T1osi Odo . 2_554 1.669(3) y
  T1msi Oa1 . .     1.668(4) y
  T1msi Obm . .     1.650(4) y
  T1msi Ocm . .     1.674(3) y
  T1msi Odm . 4_544 1.677(3) y
  T2osi Oa2 . .     1.661(3) y
  T2osi Obo . .     1.628(5) y
  T2osi Ocm . .     1.625(3) y
  T2osi Odm . .     1.625(4) y
  T2msi Oa2 . .     1.642(3) y
  T2msi Obm . 3_455 1.625(5) y
  T2msi Oco . .     1.633(3) y
  T2msi Odo . .     1.645(3) y

loop_
 _geom_angle_atom_site_label_1
 _geom_angle_atom_site_label_2
 _geom_angle_atom_site_label_3
 _geom_angle_site_symmetry_1
 _geom_angle_site_symmetry_2
 _geom_angle_site_symmetry_3
 _geom_angle
 _geom_angle_publ_flag
  Oa1 T1osi Obo   4_545 . .     104.79(19) n
  Oa1 T1osi Oco   4_545 . 3_445 114.4(2)   n
  Oa1 T1osi Odo   4_545 . 2_554 105.35(19) n
  Obo T1osi Oco       . . 3_445 111.4(2)   n
  Obo T1osi Odo       . . 2_554 110.91(19) n
  Oco T1osi Odo   3_445 . 2_554 109.80(15) n
  Oa1 T1msi Obm       . . .     106.65(19) n
  Oa1 T1msi Ocm       . . .     113.2(2)   n
  Oa1 T1msi Odm       . . 4_544 105.6(2)   n
  Obm T1msi Ocm       . . .     110.2(2)   n
  Obm T1msi Odm       . . 4_544 111.0(2)   n
  Ocm T1msi Odm       . . 4_544 110.10(16) n
  Oa2 T2osi Obo       . . .     108.4(2)   n
  Oa2 T2osi Ocm       . . .     105.43(17) n
  Oa2 T2osi Odm       . . .     107.79(19) n
  Obo T2osi Ocm       . . .     111.2(2)   n
  Obo T2osi Odm       . . .     111.76(19) n
  Ocm T2osi Odm       . . .     111.9(2)   n
  Oa2 T2msi Obm       . . 3_455 110.3(2)   n
  Oa2 T2msi Oco       . . .     106.65(17) n
  Oa2 T2msi Odo       . . .     107.69(18) n
  Obm T2msi Oco   3_455 . .     109.6(2)   n
  Obm T2msi Odo   3_455 . .     110.91(18) n
  Oco T2msi Odo       . . .     111.5(2)   n
  T1osi Oa1 T1msi 4_545 . .     142.9(2)   n
  T2osi Oa2 T2msi     . . .     129.39(19) n
  T1osi Obo T2osi     . . .     144.6(2)   n
  T1msi Obm T2msi     . . 3_545 156.3(2)   n
  T1osi Oco T2msi 3_555 . .     131.7(2)   n
  T1msi Ocm T2osi     . . .     134.2(2)   n
  T1osi Odo T2msi 2_554 . .     138.3(3)   n
  T1msi Odm T2osi 4_544 . .     146.1(3)   n

#===============================================================================

# 7. STRUCTURE-FACTOR LIST

loop_
 _refln_index_h
 _refln_index_k
 _refln_index_l
 _refln_F_squared_calc
 _refln_F_squared_meas
 _refln_F_squared_sigma
 _refln_observed_status
   2   0   0     13.42     97.49     48.74 <
   8   0   0     12.94      0.00    134.04 <
  -9   1   0    240.10    463.06    974.87 <
  -1   1   0    500.74    572.74     36.56 o
   7   1   0   1003.25   1474.49    207.16 o
   9   1   0    207.75    341.20    987.06 <
  -8   2   0    680.32    877.38     97.49 o
  -4   2   0   1720.03   1693.84     73.12 o
  -2   2   0  14189.40  13197.30    475.25 o
   2   2   0  12915.50  12356.50    450.88 o
   8   2   0    531.89    706.78     97.49 o
  -9   3   0   1186.99    913.94    134.04 o
  -7   3   0    444.95    426.51     60.93 o
  -5   3   0   1532.65   1571.98     73.12 o
  -3   3   0    771.93    804.27     48.74 o
   5   3   0   2341.59   2485.92    109.67 o
   7   3   0    218.96    268.09     48.74 o
   9   3   0   1858.93   2108.16    219.35 o
  -8   4   0   1716.79   1779.14    121.86 o
  -6   4   0   8743.95   8408.26    292.46 o
  -4   4   0    243.62    231.53     24.37 o
  -2   4   0   2105.06   1876.63     85.30 o
   4   4   0     46.57     36.56     12.19 o
   6   4   0   8406.27   8907.88    316.83 o
   8   4   0   2301.96   2522.48    170.60 o
  -9   5   0     20.93     97.49     85.30 <
  -7   5   0    173.41    207.16     48.74 o
  -5   5   0   1297.71   1230.77     73.12 o
  -3   5   0      1.54     12.19     12.19 <
  -1   5   0    463.77    499.62     24.37 o
   3   5   0     29.30     48.74     12.19 o
   5   5   0    641.96    633.67     60.93 o
   7   5   0   1079.80   1364.82    146.23 o
   9   5   0     53.73    134.04    146.23 <
  -8   6   0   2500.53   2437.18    158.42 o
  -6   6   0     87.96     97.49     36.56 <
  -4   6   0   3415.90   3399.86    134.04 o
   4   6   0   4976.78   4667.19    170.60 o
   6   6   0    340.75    365.58     48.74 o
   8   6   0   1485.97   1425.75    121.86 o
  -7   7   0    426.80    402.13     73.12 o
  -5   7   0    769.36    804.27     60.93 o
  -3   7   0    460.29    438.69     36.56 o
   1   7   0    293.55    243.72     24.37 o
   3   7   0    846.91    816.45     48.74 o
   5   7   0   1099.25   1108.92     85.30 o
   7   7   0    244.00    121.86     60.93 <
  -8   8   0   1710.10   1693.84    170.60 o
  -6   8   0     48.16     48.74     48.74 <
  -2   8   0  11060.00  11077.00    402.13 o
   2   8   0  10601.00  11016.00    402.13 o
   4   8   0   1332.96   1328.26     73.12 o
   6   8   0     18.61     73.12     48.74 <
   8   8   0   3533.75   3302.37    280.27 o
  -7   9   0      5.52     60.93     60.93 <
  -5   9   0   1642.80   1620.72     97.49 o
  -3   9   0     99.47    170.60     48.74 o
  -1   9   0   1324.44   1194.22     85.30 o
   1   9   0   4965.45   5118.07    231.53 o
   3   9   0     91.53     97.49     36.56 <
   5   9   0   1560.13   1486.68     97.49 o
   7   9   0    469.00    426.51     73.12 o
  -8  10   0    128.98      0.00    158.42 <
  -6  10   0     20.45     36.56     48.74 <
  -4  10   0    143.26    121.86     48.74 <
  -2  10   0    512.03    536.18     60.93 o
   0  10   0   2223.56   2144.72    121.86 o
   2  10   0      0.02     24.37     36.56 <
   4  10   0      5.49    109.67     48.74 <
   6  10   0    131.45    158.42     60.93 <
  -7  11   0    120.57     48.74    134.04 <
  -5  11   0    105.67    109.67     60.93 <
  -3  11   0    694.68    718.97     85.30 o
  -1  11   0      3.79     36.56     36.56 <
   1  11   0    129.55    146.23     48.74 o
   3  11   0    501.52    548.36     73.12 o
   5  11   0     52.57     97.49     60.93 <
   7  11   0    670.53    645.85    219.35 <
  -6  12   0     82.51    219.35    109.67 <
  -4  12   0     49.42     24.37     60.93 <
  -2  12   0    961.47   1096.73     97.49 o
   0  12   0    218.99    268.09     60.93 o
   2  12   0   1163.00   1133.29     97.49 o
   4  12   0    225.62    182.79     60.93 <
   6  12   0    240.31    365.58     85.30 o
  -5  13   0    287.74    316.83     85.30 o
  -3  13   0     63.15    121.86     60.93 <
  -1  13   0      4.98     12.19     48.74 <
   1  13   0    163.73    146.23     60.93 <
   3  13   0    229.93    219.35     60.93 o
   5  13   0     85.68    158.42     97.49 <
  -4  14   0    346.21    353.39     73.12 o
  -2  14   0     11.04     36.56     60.93 <
   0  14   0    694.55    755.53     85.30 o
   2  14   0     56.58    109.67     60.93 <
   4  14   0     17.02     73.12     85.30 <
  -5  15   0      0.16      0.00    146.23 <
  -3  15   0    171.93    231.53     85.30 <
  -1  15   0     46.45     85.30     60.93 <
   1  15   0    192.58    255.90     73.12 o
   3  15   0    290.68    450.88    109.67 o
  -2  16   0      8.69     73.12     85.30 <
   2  16   0      0.58     12.19     73.12 <
  -2 -16   1    142.78    219.35     85.30 <
   0 -16   1    347.48    548.36     85.30 o
   2 -16   1     17.44     12.19    109.67 <
  -5 -15   1     27.86     12.19    121.86 <
  -3 -15   1    137.79    207.16     85.30 <
  -1 -15   1     32.40     60.93     48.74 <
   1 -15   1     78.80    109.67     60.93 <
   3 -15   1    483.44    633.67    146.23 o
  -6 -14   1     27.31    316.83    207.16 <
  -4 -14   1    359.50    499.62     85.30 o
  -2 -14   1     62.26     36.56     60.93 <
   0 -14   1    368.60    402.13     73.12 o
   2 -14   1     27.17     73.12     60.93 <
   4 -14   1      1.87     60.93     85.30 <
  -5 -13   1    264.83    219.35     73.12 <
  -3 -13   1      9.89     12.19     60.93 <
  -1 -13   1    109.21    121.86     48.74 <
   1 -13   1    358.11    414.32     60.93 o
   3 -13   1    204.18    268.09     60.93 o
   5 -13   1     44.11    231.53    121.86 <
  -6 -12   1     91.15    109.67     97.49 <
  -4 -12   1    167.18    170.60     60.93 <
  -2 -12   1   1375.89   1437.93     97.49 o
   0 -12   1    775.63    828.64     85.30 o
   2 -12   1    941.48   1145.47     97.49 o
   4 -12   1    205.23    109.67     60.93 <
   6 -12   1    163.62    121.86    121.86 <
  -7 -11   1      0.26      0.00    134.04 <
  -5 -11   1     38.92     36.56     60.93 <
  -3 -11   1    673.16    840.83     85.30 o
  -1 -11   1     16.06     24.37     36.56 <
   1 -11   1    122.04    121.86     48.74 <
   3 -11   1    150.47    170.60     60.93 <
   5 -11   1      9.67     48.74     60.93 <
   7 -11   1    228.10    743.34    268.09 <
  -8 -10   1     32.12    109.67    109.67 <
  -6 -10   1      7.50     24.37     48.74 <
  -4 -10   1     91.45     48.74     48.74 <
  -2 -10   1    161.14    146.23     36.56 o
   0 -10   1    577.74    523.99     48.74 o
   2 -10   1    624.40    621.48     60.93 o
   4 -10   1     72.97     24.37     48.74 <
   6 -10   1    526.50    658.04     97.49 o
  -7  -9   1    564.24    536.18     73.12 o
  -5  -9   1    302.77    255.90     48.74 o
  -3  -9   1    162.54    146.23     36.56 o
  -1  -9   1    165.12    194.97     36.56 o
   1  -9   1   2491.76   2424.99    121.86 o
   3  -9   1     18.11     12.19     24.37 <
   5  -9   1     28.97     48.74     48.74 <
   7  -9   1    916.73    962.68     97.49 o
  -8  -8   1    724.97    560.55     85.30 o
  -6  -8   1    344.08    341.20     60.93 o
  -4  -8   1      0.23     36.56     36.56 <
  -2  -8   1   4872.02   4411.29    170.60 o
   0  -8   1   1748.48   1571.98     85.30 o
   2  -8   1   1239.35   1157.66     60.93 o
   4  -8   1   1563.68   1632.91     97.49 o
   6  -8   1    166.01    121.86     48.74 <
  -9  -7   1    388.68    438.69    219.35 <
  -7  -7   1      8.72     24.37     48.74 <
  -5  -7   1    258.38    207.16     48.74 o
  -3  -7   1    132.34    121.86     24.37 o
  -1  -7   1    251.56    194.97     36.56 o
   1  -7   1    698.82    658.04     24.37 o
   3  -7   1    314.29    292.46     36.56 o
   7  -7   1     90.19    121.86     60.93 <
  -8  -6   1     88.92    109.67     60.93 <
  -6  -6   1      5.04     48.74     36.56 <
  -4  -6   1   2624.05   2449.36    109.67 o
   2  -6   1    504.85    463.06     24.37 o
   6  -6   1     39.62     24.37     36.56 <
   8  -6   1    161.72    207.16    109.67 <
  -9  -5   1      6.62     60.93     73.12 <
  -7  -5   1    793.49    865.20     73.12 o
  -5  -5   1   1232.16   1194.22     60.93 o
  -3  -5   1    931.24    962.68     48.74 o
  -1  -5   1   2767.27   2559.03     97.49 o
   1  -5   1   2914.57   2827.12     97.49 o
   3  -5   1   2708.56   2778.38    109.67 o
   5  -5   1      0.18     24.37     24.37 <
   7  -5   1    636.11    645.85     73.12 o
  -8  -4   1   1248.37   1340.45     97.49 o
  -6  -4   1     82.43    170.60     36.56 o
   0  -4   1   7001.43   6312.29    207.16 o
   2  -4   1   7901.03   8262.03    292.46 o
   4  -4   1   1397.55   1425.75     60.93 o
   6  -4   1   1637.29   1535.42     97.49 o
   8  -4   1    626.34    633.67     97.49 o
  -9  -3   1    292.03    353.39     85.30 o
  -7  -3   1    203.68    158.42     48.74 o
  -5  -3   1   2171.09   2437.18     97.49 o
  -1  -3   1   1795.85   1681.65     73.12 o
   3  -3   1    856.56    779.90     36.56 o
   5  -3   1     79.96     48.74     24.37 <
   7  -3   1    472.68    633.67     85.30 o
  -8  -2   1    235.75    268.09     60.93 o
  -4  -2   1    132.98    109.67     24.37 o
  -2  -2   1    490.35    450.88     24.37 o
   2  -2   1   1514.36   1474.49     60.93 o
   4  -2   1    430.74    475.25     36.56 o
   6  -2   1      1.22     24.37     36.56 <
   8  -2   1    443.60    377.76     73.12 o
  -9  -1   1    579.42   1279.52    280.27 o
   5  -1   1    664.83    816.45     85.30 o
   6   0   1   2836.82   4045.71    426.51 o
   8   0   1    694.14    779.90    134.04 o
  -9   1   1    843.44   1047.99    280.27 o
  -7   1   1    599.35    706.78    219.35 o
   1   1   1   7905.64   8201.10    536.18 o
   7   1   1   1834.80   2559.03    329.02 o
  -8   2   1      3.52    158.42     73.12 <
  -4   2   1      0.81     73.12     24.37 o
  -2   2   1     95.99    134.04     24.37 o
   0   2   1     96.08    146.23     24.37 o
   2   2   1   2078.24   2193.46     73.12 o
   4   2   1     41.50     73.12     24.37 o
   6   2   1      0.41     24.37     36.56 <
   8   2   1    163.91    304.65     73.12 o
  -9   3   1    187.35    292.46     85.30 o
  -7   3   1      1.19     97.49     73.12 <
  -5   3   1   1630.66   1840.07     85.30 o
  -3   3   1   4057.98   4313.80    146.23 o
  -1   3   1    327.71    280.27     24.37 o
   1   3   1   9183.61   8322.96    280.27 o
   3   3   1    982.28    962.68     48.74 o
   5   3   1    332.76    414.32     36.56 o
   7   3   1    866.41    828.64     85.30 o
  -8   4   1    521.33    511.81     73.12 o
  -6   4   1   2362.44   2339.69    109.67 o
  -4   4   1   3151.49   3022.10    109.67 o
  -2   4   1   9275.64   8432.63    292.46 o
   2   4   1   2095.70   2022.86     73.12 o
   4   4   1   3031.04   3046.47    109.67 o
   6   4   1    938.55    926.13     73.12 o
   8   4   1    257.34    463.06    109.67 o
  -9   5   1     12.93    109.67     73.12 <
  -7   5   1   1271.65   1194.22     85.30 o
  -5   5   1   1171.89   1096.73     60.93 o
  -3   5   1    939.86    950.50     48.74 o
   3   5   1   4201.59   4374.73    158.42 o
   5   5   1     28.79     24.37     36.56 <
   7   5   1    329.67    377.76     60.93 o
  -8   6   1    381.63    438.69     73.12 o
  -6   6   1    131.41    134.04     36.56 o
  -4   6   1   7504.24   7274.97    255.90 o
  -2   6   1      4.36     12.19     24.37 <
   2   6   1    109.56    109.67     24.37 o
   4   6   1    154.14    146.23     24.37 o
   6   6   1    357.76    353.39     60.93 o
   8   6   1      8.04     60.93     85.30 <
  -9   7   1    308.65    207.16    121.86 <
  -7   7   1     90.98     60.93     48.74 <
  -5   7   1   1250.63   1291.70     73.12 o
  -3   7   1     20.35     36.56     24.37 <
  -1   7   1    361.26    353.39     36.56 o
   3   7   1    521.64    487.43     48.74 o
   5   7   1     74.54     48.74     36.56 <
   7   7   1    360.89    304.65     73.12 o
  -8   8   1    138.57    109.67     60.93 <
  -6   8   1    137.12    109.67     48.74 <
  -4   8   1   1720.96   1754.77     97.49 o
  -2   8   1    230.23    207.16     24.37 o
   0   8   1    275.92    207.16     36.56 o
   4   8   1    537.50    560.55     48.74 o
   6   8   1    602.22    597.11     73.12 o
  -7   9   1   1480.98   1389.19     97.49 o
  -5   9   1     84.22     85.30     48.74 <
  -3   9   1   1275.46   1242.96     73.12 o
  -1   9   1   1690.38   1450.12     85.30 o
   1   9   1    315.42    268.09     36.56 o
   3   9   1    172.37    158.42     36.56 o
   5   9   1    296.91    280.27     48.74 o
   7   9   1    426.88    377.76     85.30 o
  -8  10   1    110.68     36.56     85.30 <
  -6  10   1     21.31     97.49     48.74 <
  -4  10   1    157.02    146.23     48.74 o
  -2  10   1   1066.75   1096.73     73.12 o
   0  10   1     16.72     12.19     36.56 <
   2  10   1    366.75    402.13     60.93 o
   4  10   1    272.65    365.58     60.93 o
   6  10   1    277.72    231.53     73.12 o
  -7  11   1     31.87    121.86     85.30 <
  -5  11   1     30.87    158.42     60.93 <
  -3  11   1     24.47     12.19     48.74 <
  -1  11   1     17.19     24.37     36.56 <
   1  11   1      2.06     24.37     36.56 <
   3  11   1    353.41    365.58     60.93 o
   5  11   1     13.16     24.37     60.93 <
  -6  12   1     82.40     73.12     60.93 <
  -4  12   1   1154.93   1389.19    109.67 o
  -2  12   1     38.88     60.93     48.74 <
   0  12   1    101.97     73.12     48.74 <
   2  12   1    226.15    231.53     48.74 o
   4  12   1    313.30    280.27     73.12 o
   6  12   1    200.07    438.69    255.90 <
  -7  13   1    269.94    109.67    194.97 <
  -5  13   1     52.99     24.37     60.93 <
  -3  13   1      7.11     48.74     60.93 <
  -1  13   1    272.44    231.53     60.93 o
   1  13   1    428.78    426.51     60.93 o
   3  13   1    178.71    194.97     73.12 <
   5  13   1     13.80     48.74    121.86 <
  -6  14   1    340.74    341.20    146.23 <
  -4  14   1     85.01     60.93     60.93 <
  -2  14   1    706.88    694.59     85.30 o
   0  14   1      5.24     73.12     48.74 <
   2  14   1      4.92     24.37     73.12 <
   4  14   1    580.64    804.27    158.42 o
  -5  15   1     74.09    109.67     97.49 <
  -3  15   1    321.00    365.58     85.30 o
  -1  15   1      2.95      0.00     48.74 <
   1  15   1    130.59    182.79     73.12 <
   3  15   1      0.48      0.00    121.86 <
  -2  16   1    165.81    292.46    109.67 <
   0  16   1     80.14    146.23    109.67 <
   2  16   1     15.98      0.00    170.60 <
  -1 -17   2      1.36    109.67    219.35 <
  -2 -16   2    241.65    414.32    121.86 o
   0 -16   2     13.67     60.93    109.67 <
   2 -16   2      0.07    146.23    219.35 <
  -5 -15   2    182.82     85.30    109.67 <
  -3 -15   2    365.75    450.88     85.30 o
  -1 -15   2    469.34    682.41     85.30 o
   1 -15   2    240.82    304.65     85.30 o
  -6 -14   2    659.10    779.90    182.79 o
  -4 -14   2      3.88      0.00     60.93 <
  -2 -14   2    885.94   1108.92     97.49 o
   0 -14   2    348.54    304.65     73.12 o
   2 -14   2     51.37    109.67     85.30 <
   4 -14   2   1168.86   1559.79    280.27 o
  -7 -13   2    249.30    341.20    194.97 <
  -5 -13   2     50.00    158.42     73.12 <
  -3 -13   2    160.86    255.90     73.12 o
  -1 -13   2    275.11    329.02     60.93 o
   1 -13   2    289.12    353.39     85.30 o
   3 -13   2     12.02     24.37     60.93 <
   5 -13   2    234.07    255.90    194.97 <
  -6 -12   2     48.90     24.37     60.93 <
  -4 -12   2   1712.79   1754.77    134.04 o
  -2 -12   2     40.17     48.74     48.74 <
   0 -12   2    408.41    389.95     60.93 o
   2 -12   2    965.53   1047.99    109.67 o
   4 -12   2     10.09     24.37     73.12 <
  -7 -11   2   1103.24   1047.99    109.67 o
  -5 -11   2    488.79    511.81     85.30 o
  -3 -11   2    934.50    804.27     73.12 o
  -1 -11   2    883.11   1047.99     73.12 o
   1 -11   2    651.03    572.74     60.93 o
   3 -11   2    937.31   1023.61    109.67 o
   5 -11   2    838.57   1047.99    134.04 o
  -8 -10   2     52.19     97.49     85.30 <
  -6 -10   2    405.93    353.39     60.93 o
  -4 -10   2      1.62     24.37     36.56 <
  -2 -10   2   1982.16   2181.27    121.86 o
   0 -10   2    613.17    597.11     48.74 o
   2 -10   2     15.73     24.37     24.37 <
   4 -10   2    646.58    463.06     85.30 o
   6 -10   2     32.70      0.00     85.30 <
  -9  -9   2      4.13      0.00    182.79 <
  -7  -9   2   1495.30   1462.31    109.67 o
  -5  -9   2    741.59    682.41     60.93 o
  -3  -9   2    564.74    511.81     48.74 o
  -1  -9   2   8596.87   8298.58    304.65 o
   1  -9   2    142.59    109.67     24.37 o
   3  -9   2   1228.10   1401.38     85.30 o
   5  -9   2   1550.68   1389.19     97.49 o
   7  -9   2      1.71      0.00    158.42 <
  -8  -8   2   2094.19   1840.07    121.86 o
  -6  -8   2     23.39     48.74     36.56 <
  -4  -8   2  11740.10  11832.50    438.69 o
  -2  -8   2    511.65    560.55     48.74 o
   0  -8   2   1735.99   1754.77     85.30 o
   2  -8   2   9512.02   9870.56    304.65 o
   4  -8   2    228.65    182.79     48.74 o
   6  -8   2   2552.32   2534.66    146.23 o
  -9  -7   2     56.34     12.19     73.12 <
  -7  -7   2     10.92     12.19     48.74 <
  -5  -7   2    263.25    194.97     36.56 o
  -3  -7   2    189.11    207.16     24.37 o
  -1  -7   2    461.99    438.69     24.37 o
   1  -7   2   1125.52   1035.80     48.74 o
   3  -7   2      7.06     24.37     24.37 <
   5  -7   2    143.49     85.30     48.74 <
   7  -7   2    105.01    121.86     73.12 <
  -8  -6   2    178.12    194.97     60.93 o
  -4  -6   2   2423.14   2315.32     85.30 o
   0  -6   2   4472.71   4484.40    134.04 o
   2  -6   2   3531.82   3424.23    121.86 o
   4  -6   2    464.47    414.32     48.74 o
   6  -6   2    981.14    828.64     73.12 o
   8  -6   2   1019.18    609.29    292.46 <
  -9  -5   2     12.07     36.56     60.93 <
  -7  -5   2   2991.10   2741.82    121.86 o
  -5  -5   2     73.90     60.93     24.37 <
  -3  -5   2     80.94     48.74     24.37 <
   1  -5   2     18.07     24.37     12.19 <
   3  -5   2    163.23    121.86     24.37 o
   5  -5   2   4195.36   4520.96    182.79 o
   7  -5   2    196.10    341.20     73.12 o
 -10  -4   2    654.79    755.53    134.04 o
  -8  -4   2    141.02    146.23     48.74 o
  -6  -4   2   4046.86   4411.29    146.23 o
  -4  -4   2   8940.73   8920.06    255.90 o
  -2  -4   2      6.57     36.56     24.37 <
   0  -4   2     32.65     48.74     24.37 <
   4  -4   2   3599.95   3948.23    146.23 o
   6  -4   2      6.30     24.37     48.74 <
   8  -4   2    178.48    231.53    158.42 <
  -9  -3   2    991.18   1096.73     85.30 o
  -7  -3   2    141.08    121.86     36.56 o
  -5  -3   2   1697.44   1754.77     60.93 o
  -3  -3   2     36.31     24.37     12.19 <
  -1  -3   2   3152.61   3412.05    170.60 o
   5  -3   2     87.22     85.30     36.56 <
   7  -3   2   1870.10   1876.63    146.23 o
 -10  -2   2     56.34      0.00    255.90 <
  -4  -2   2   3744.82   4057.90    146.23 o
  -2  -2   2   3625.75   3753.25    134.04 o
   8  -2   2    302.03    426.51    170.60 <
  -9  -1   2    142.93    255.90    158.42 <
  -5  -1   2     42.28     97.49     24.37 o
  -3  -1   2   1470.49   1681.65     73.12 o
  -1  -1   2   3938.57 209427.00 288269.00 <
   1  -1   2   1619.84   1754.77     97.49 o
   3  -1   2     21.41     12.19     24.37 <
   5  -1   2    159.16    243.72     73.12 o
   7  -1   2    721.23   1084.54    146.23 o
 -10   0   2    130.64    255.90    207.16 <
  -8   0   2     17.49     24.37     73.12 <
   6   0   2    257.04    389.95     85.30 o
   8   0   2    505.35    889.57   1267.33 <
  -9   1   2    126.12    121.86    170.60 <
  -7   1   2    220.54    414.32    231.53 <
  -5   1   2     78.01     97.49     24.37 o
  -1   1   2   5820.21 253905.00 214386.00 <
   3   1   2      2.02     24.37     24.37 <
   5   1   2    115.72    109.67     73.12 <
   7   1   2    499.79    645.85    146.23 o
 -10   2   2    148.50    121.86    255.90 <
   0   2   2   1012.52    987.06     60.93 o
   2   2   2   6572.70   6397.59    231.53 o
   4   2   2   1003.66    901.76     60.93 o
   6   2   2   2662.16   2900.24    158.42 o
   8   2   2    291.90    743.34    207.16 o
  -7   3   2     38.23    146.23     48.74 o
  -5   3   2    843.39    987.06     48.74 o
  -3   3   2    360.43    389.95     24.37 o
   3   3   2   1932.10   1937.55     73.12 o
   5   3   2    164.53    207.16     36.56 o
   7   3   2   1285.12   1267.33    109.67 o
 -10   4   2    346.77    377.76    121.86 o
  -8   4   2     99.37    182.79     73.12 <
  -6   4   2   6628.00   7287.16    243.72 o
  -4   4   2   6658.67   6482.89    182.79 o
  -2   4   2   1004.66    901.76     48.74 o
   2   4   2   7236.99   7299.34    219.35 o
   4   4   2   4356.11   4106.64    158.42 o
   6   4   2     25.12     48.74     48.74 <
  -9   5   2     83.88     48.74     48.74 <
  -7   5   2   1657.80   1754.77     97.49 o
  -5   5   2    246.43    243.72     36.56 o
  -3   5   2    366.63    329.02     36.56 o
   3   5   2    220.31    219.35     24.37 o
   5   5   2   3876.33   3558.28    158.42 o
   7   5   2     30.86     24.37     48.74 <
  -8   6   2    555.51    536.18     73.12 o
  -6   6   2      1.90     60.93     36.56 <
  -4   6   2   4681.59   4752.49    146.23 o
  -2   6   2   2584.77   2559.03    109.67 o
   2   6   2   5576.60   5215.56    170.60 o
   4   6   2    675.48    694.59     60.93 o
   6   6   2    604.96    463.06     73.12 o
  -9   7   2    164.87     24.37     73.12 <
  -7   7   2    527.83    499.62     60.93 o
  -5   7   2      7.31     24.37     36.56 <
  -3   7   2    181.54    182.79     36.56 o
  -1   7   2      1.16     12.19     12.19 <
   1   7   2     26.33     24.37     12.19 <
   3   7   2     31.67     85.30     36.56 <
   5   7   2    356.05    353.39     48.74 o
   7   7   2     18.86    134.04    170.60 <
  -8   8   2   1556.46   1645.09    109.67 o
  -6   8   2    203.04     97.49     48.74 <
  -4   8   2  10499.10  10930.70    377.76 o
  -2   8   2    469.90    426.51     48.74 o
   0   8   2    113.39    121.86     24.37 o
   2   8   2  11937.10  12076.20    402.13 o
   4   8   2      4.72     24.37     36.56 <
   6   8   2   2505.35   2656.52    170.60 o
  -9   9   2     24.03     60.93    194.97 <
  -7   9   2     57.28    109.67     60.93 <
  -5   9   2   1314.00   1242.96     85.30 o
  -3   9   2     32.44     24.37     36.56 <
  -1   9   2   3984.07   4118.83    158.42 o
   1   9   2    904.74    840.83     60.93 o
   3   9   2    247.60    243.72     48.74 o
   5   9   2   1338.61   1389.19    109.67 o
  -8  10   2     88.58    134.04     85.30 <
  -6  10   2    644.70    658.04     73.12 o
  -4  10   2    338.20    292.46     48.74 o
  -2  10   2    333.36    280.27     48.74 o
   0  10   2   1362.67   1389.19     73.12 o
   2  10   2    169.78     85.30     48.74 <
   4  10   2    582.08    670.22     97.49 o
   6  10   2      2.98    170.60    207.16 <
  -7  11   2     83.08    109.67     60.93 <
  -5  11   2    161.05    121.86     60.93 <
  -3  11   2   1080.21   1096.73     85.30 o
  -1  11   2     73.26     48.74     36.56 <
   1  11   2    981.69   1035.80     97.49 o
   3  11   2    120.34    109.67     73.12 <
   5  11   2    352.11    487.43    109.67 o
  -6  12   2    208.98    219.35     73.12 <
  -4  12   2   1328.02   1291.70    109.67 o
  -2  12   2     15.97     24.37     48.74 <
   0  12   2     63.43     12.19     48.74 <
   2  12   2   1831.90   2010.67    146.23 o
   4  12   2     69.15    121.86     85.30 <
  -5  13   2    118.97     85.30     60.93 <
  -3  13   2     57.91     24.37     48.74 <
  -1  13   2     59.58    194.97     73.12 <
   1  13   2     53.64    134.04     73.12 <
   3  13   2    139.55    134.04     85.30 <
  -6  14   2    598.21   1242.96    280.27 o
  -4  14   2      1.09     73.12     60.93 <
  -2  14   2    149.72    158.42     60.93 <
   0  14   2    486.06    597.11     97.49 o
   2  14   2      7.74     73.12     73.12 <
   4  14   2    448.87    816.45    219.35 o
  -5  15   2     42.88     36.56     97.49 <
  -3  15   2    236.75    207.16     73.12 <
  -1  15   2     22.46     36.56     73.12 <
   1  15   2    439.69    633.67    134.04 o
  -4  16   2     93.07      0.00    146.23 <
  -2  16   2     52.66     36.56    109.67 <
   0  16   2     70.63    292.46    134.04 <
  -4 -16   3    165.88     12.19    207.16 <
  -2 -16   3     15.68      0.00    109.67 <
   0 -16   3    146.22    365.58    134.04 <
  -5 -15   3     42.21      0.00    134.04 <
  -3 -15   3      0.90     24.37     97.49 <
  -1 -15   3     35.70     24.37     85.30 <
   1 -15   3     66.98    194.97    121.86 <
  -6 -14   3     17.68      0.00     97.49 <
  -4 -14   3     43.35     36.56     73.12 <
  -2 -14   3     91.60     85.30     73.12 <
   0 -14   3     15.31     24.37     60.93 <
   2 -14   3    248.49    219.35    121.86 <
  -5 -13   3    389.92    463.06     85.30 o
  -3 -13   3    307.82    402.13     73.12 o
  -1 -13   3    181.28    182.79     60.93 <
   1 -13   3     22.31     48.74     60.93 <
   3 -13   3    192.33    146.23    121.86 <
  -6 -12   3   1627.79   1645.09    146.23 o
  -4 -12   3    172.68    207.16     60.93 o
  -2 -12   3    104.40     60.93     48.74 <
   0 -12   3    699.84    597.11     85.30 o
   2 -12   3    708.06    731.15     97.49 o
   4 -12   3    470.15    450.88    134.04 o
  -7 -11   3    396.70    304.65     73.12 o
  -5 -11   3      5.05     24.37     36.56 <
  -3 -11   3     91.15     60.93     48.74 <
  -1 -11   3    478.51    536.18     73.12 o
   1 -11   3      9.47     60.93     60.93 <
   3 -11   3    161.12    109.67     73.12 <
   5 -11   3      2.21     73.12    134.04 <
  -8 -10   3    114.10     97.49     85.30 <
  -6 -10   3      7.04     12.19     48.74 <
  -4 -10   3    120.16    134.04     48.74 <
  -2 -10   3    141.36    134.04     48.74 <
   0 -10   3    288.60    207.16     48.74 o
   2 -10   3      6.36     24.37     60.93 <
   4 -10   3      0.60     36.56     73.12 <
  -9  -9   3    452.36    243.72    146.23 <
  -7  -9   3    277.91    304.65     60.93 o
  -5  -9   3      7.83     24.37     36.56 <
  -3  -9   3   1916.84   1754.77     97.49 o
  -1  -9   3     31.66     48.74     24.37 <
   1  -9   3    580.38    487.43     60.93 o
   3  -9   3    734.96    743.34     97.49 o
   5  -9   3    649.23    828.64    109.67 o
  -8  -8   3    100.82    109.67     60.93 <
  -6  -8   3   4679.13   4350.36    170.60 o
  -4  -8   3   1228.64   1328.26     85.30 o
  -2  -8   3    548.25    523.99     48.74 o
   0  -8   3   3457.53   3363.30    158.42 o
   2  -8   3   1138.59   1182.03     73.12 o
   4  -8   3    693.64    597.11     73.12 o
   6  -8   3      0.07     12.19     73.12 <
  -9  -7   3     17.20     73.12     73.12 <
  -7  -7   3    198.75    134.04     48.74 <
  -5  -7   3     90.68    109.67     36.56 <
  -3  -7   3    367.11    414.32     36.56 o
  -1  -7   3   1135.04   1047.99     48.74 o
   1  -7   3    872.24    877.38     48.74 o
   3  -7   3   1310.34   1328.26     73.12 o
   5  -7   3     34.30     48.74     48.74 <
 -10  -6   3    153.31    207.16    194.97 <
  -8  -6   3     91.34    146.23     60.93 <
  -6  -6   3    331.50    280.27     48.74 o
  -4  -6   3   1571.61   1559.79     85.30 o
  -2  -6   3     14.66     24.37     12.19 <
   0  -6   3    303.08    341.20     24.37 o
   2  -6   3    272.21    243.72     24.37 o
   4  -6   3      5.75     24.37     36.56 <
   6  -6   3     52.98     24.37     60.93 <
  -9  -5   3    417.16    402.13     85.30 o
  -7  -5   3    922.13   1011.43     73.12 o
  -5  -5   3   1411.80   1535.42     60.93 o
  -3  -5   3   2921.42   3046.47    121.86 o
  -1  -5   3    227.43    243.72     12.19 o
   1  -5   3    111.12    121.86     24.37 o
   3  -5   3   3974.29   3936.04    182.79 o
   5  -5   3    171.91    170.60     60.93 <
   7  -5   3     48.36     12.19    134.04 <
 -10  -4   3      1.44     12.19     97.49 <
  -8  -4   3   1334.32   1291.70     85.30 o
  -6  -4   3   6090.90   6373.22    231.53 o
  -4  -4   3   1297.73   1328.26     60.93 o
   2  -4   3   8761.92   9553.73    341.20 o
   4  -4   3   1981.30   1986.30     97.49 o
   6  -4   3     19.05     48.74     48.74 <
  -9  -3   3    172.34    231.53     60.93 o
  -7  -3   3    445.67    487.43     48.74 o
  -3  -3   3    263.53    268.09     24.37 o
   3  -3   3   1519.60   1450.12     73.12 o
   5  -3   3    724.43    865.20     73.12 o
   7  -3   3    181.11    182.79     97.49 <
  -8  -2   3   1103.38   1267.33     85.30 o
  -4  -2   3    451.36    463.06     24.37 o
   4  -2   3    294.52    268.09     48.74 o
   6  -2   3     38.89     36.56     48.74 <
  -9  -1   3      0.61     12.19     97.49 <
  -7  -1   3     38.48    170.60     48.74 o
  -1  -1   3    556.22  60381.00 153335.00 <
   7  -1   3     32.92     12.19    109.67 <
 -10   0   3    247.71    414.32    134.04 o
  -2   0   3     87.59    109.67     24.37 o
   4   0   3    445.90    597.11     97.49 o
   6   0   3    213.93    268.09     73.12 o
  -9   1   3     18.74     24.37     97.49 <
  -7   1   3    159.84    146.23     48.74 o
  -5   1   3   1467.50   1657.28     97.49 o
  -3   1   3   1785.74   1961.93     97.49 o
  -1   1   3   1694.09  69276.70 158112.00 <
   1   1   3  10158.40  10894.20    950.50 o
   3   1   3   2792.68   2985.54    316.83 o
   5   1   3   1323.70   1072.36    182.79 o
   7   1   3      0.06     12.19    109.67 <
 -10   2   3    638.03    645.85    255.90 <
   0   2   3    905.70    926.13     48.74 o
   2   2   3   1092.12   1206.40     60.93 o
   4   2   3      9.24     24.37     36.56 <
   6   2   3    164.51    268.09     60.93 o
  -9   3   3    404.45    499.62     73.12 o
  -7   3   3     83.42     73.12     36.56 <
  -5   3   3   5160.06   5715.18    194.97 o
  -3   3   3     16.77     73.12     24.37 o
   1   3   3   1248.89   1316.08     60.93 o
   3   3   3    322.46    341.20     36.56 o
   5   3   3    837.26    755.53     60.93 o
   7   3   3    494.65    341.20    146.23 <
 -10   4   3     68.65    219.35    121.86 <
  -8   4   3   1508.88   1596.35     97.49 o
  -6   4   3    873.20    950.50     60.93 o
  -4   4   3    429.17    426.51     24.37 o
  -2   4   3     33.73     36.56     12.19 o
   0   4   3   2943.19   2912.43     97.49 o
   2   4   3   6297.69   6519.45    219.35 o
   4   4   3   1174.01   1023.61     73.12 o
   6   4   3      5.90     36.56     60.93 <
  -9   5   3    221.86    304.65     85.30 o
  -7   5   3   3100.88   2814.94    121.86 o
  -3   5   3   5086.90   5325.23    207.16 o
  -1   5   3    437.17    426.51     24.37 o
   1   5   3    105.21    146.23     24.37 o
   3   5   3   6947.56   6885.02    255.90 o
   5   5   3     87.77    121.86     48.74 <
 -10   6   3    931.86   1072.36    292.46 o
  -8   6   3    145.08    182.79     60.93 <
  -6   6   3   3424.95   3643.58    146.23 o
  -4   6   3   3535.75   3399.86    146.23 o
  -2   6   3    410.64    438.69     24.37 o
   0   6   3   5772.99   5776.11    207.16 o
   2   6   3    244.17    219.35     36.56 o
   4   6   3    661.92    609.29     60.93 o
   6   6   3    184.89    207.16     73.12 <
  -9   7   3     24.23     60.93     73.12 <
  -7   7   3    170.58    182.79     48.74 o
  -5   7   3      5.67     12.19     36.56 <
  -3   7   3      0.97     12.19     24.37 <
  -1   7   3    263.87    255.90     24.37 o
   1   7   3   1105.07   1084.54     60.93 o
   3   7   3    248.01    219.35     36.56 o
   5   7   3     18.24     24.37     48.74 <
  -8   8   3    198.10    158.42     60.93 <
  -6   8   3   3603.54   3204.89    158.42 o
  -4   8   3    161.07     97.49     36.56 <
  -2   8   3   1906.15   1803.51     85.30 o
   0   8   3   2610.30   2985.54    146.23 o
   2   8   3    473.47    511.81     48.74 o
   4   8   3    633.98    682.41     73.12 o
   6   8   3    498.43    463.06    182.79 <
  -9   9   3    629.94    426.51    158.42 <
  -7   9   3   1059.21   1121.10     97.49 o
  -5   9   3      0.08      0.00     36.56 <
  -3   9   3   3603.94   3777.62    158.42 o
  -1   9   3   1509.26   1486.68     73.12 o
   1   9   3    314.94    280.27     60.93 o
   3   9   3   3117.15   3314.56    194.97 o
   5   9   3     44.79     36.56     85.30 <
  -8  10   3    444.28    536.18     97.49 o
  -6  10   3    255.96    341.20     60.93 o
  -4  10   3    250.79    231.53     48.74 o
  -2  10   3    520.58    511.81     48.74 o
   0  10   3    212.34    280.27     60.93 o
   2  10   3     41.47     24.37     60.93 <
   4  10   3     61.59     24.37     73.12 <
  -7  11   3    347.19    377.76     73.12 o
  -5  11   3    123.85    121.86     48.74 <
  -3  11   3    370.93    316.83     48.74 o
  -1  11   3    333.40    365.58     60.93 o
   1  11   3    414.62    511.81     85.30 o
   3  11   3    631.64    584.92     97.49 o
  -6  12   3    429.79    389.95     97.49 o
  -4  12   3    557.93    682.41     85.30 o
  -2  12   3    216.96    182.79     60.93 <
   0  12   3    993.03   1060.17     97.49 o
   2  12   3      0.00     12.19     73.12 <
   4  12   3    270.43    304.65    146.23 <
  -7  13   3    281.94     48.74    207.16 <
  -5  13   3    320.77    194.97     73.12 <
  -3  13   3    358.63    304.65     60.93 o
  -1  13   3      1.24    146.23     73.12 <
   1  13   3    190.06    280.27     73.12 o
   3  13   3    532.53    633.67    146.23 o
  -6  14   3     37.71    304.65    207.16 <
  -4  14   3    118.47     48.74     73.12 <
  -2  14   3    983.05   1340.45    134.04 o
   0  14   3      7.65     12.19     60.93 <
   2  14   3    745.61    962.68    158.42 o
  -5  15   3    394.49    816.45    243.72 o
  -3  15   3    182.91    292.46    134.04 <
  -1  15   3    239.89    280.27    121.86 <
   1  15   3    148.25    207.16    146.23 <
  -2  16   3     31.77     24.37    194.97 <
   0  16   3      4.21     48.74    194.97 <
  -2 -16   4    181.69     60.93    219.35 <
  -3 -15   4    202.83    280.27    134.04 <
  -1 -15   4    297.19    463.06    146.23 o
   1 -15   4      9.01      0.00    121.86 <
  -6 -14   4     55.03    182.79    182.79 <
  -4 -14   4      1.85      0.00     73.12 <
  -2 -14   4    609.29    840.83    121.86 o
   0 -14   4      0.32    194.97    121.86 <
   2 -14   4    248.81    255.90    194.97 <
  -7 -13   4    221.28    426.51    207.16 <
  -5 -13   4    466.16    329.02     85.30 o
  -3 -13   4     49.74     36.56     73.12 <
  -1 -13   4     20.25     24.37     60.93 <
   1 -13   4    415.18    353.39     85.30 o
   3 -13   4    494.97    755.53    158.42 o
  -6 -12   4    212.00     97.49     73.12 <
  -4 -12   4    152.77    109.67     60.93 <
  -2 -12   4      0.63     85.30     60.93 <
   0 -12   4    651.25    743.34     97.49 o
   2 -12   4      0.76     73.12     85.30 <
  -7 -11   4    944.04   1084.54    109.67 o
  -5 -11   4      1.71     97.49     48.74 <
  -3 -11   4    453.05    621.48     73.12 o
  -1 -11   4    599.90    658.04     85.30 o
   1 -11   4      3.64      0.00     48.74 <
   3 -11   4   1109.55   1291.70    134.04 o
  -8 -10   4    109.33    182.79     85.30 <
  -6 -10   4      9.78     73.12     48.74 <
  -4 -10   4      0.48     48.74     48.74 <
  -2 -10   4   1421.27   1279.52    109.67 o
   0 -10   4     39.19     12.19     48.74 <
   2 -10   4     38.27    121.86     73.12 <
   4 -10   4     83.89    170.60     97.49 <
  -7  -9   4   1714.11   1462.31     97.49 o
  -5  -9   4      1.90     24.37     48.74 <
  -3  -9   4   3201.21   3314.56    146.23 o
  -1  -9   4   3358.62   3253.63    170.60 o
   1  -9   4      8.59     36.56     60.93 <
   3  -9   4   2761.17   2851.50    194.97 o
   5  -9   4    110.29     60.93    219.35 <
  -8  -8   4      2.21     48.74     48.74 <
  -6  -8   4   1446.74   1328.26     97.49 o
  -4  -8   4   2115.87   2181.27    109.67 o
  -2  -8   4     31.30     12.19     24.37 <
   0  -8   4   3760.08   3704.51    170.60 o
   2  -8   4    644.52    694.59     85.30 o
   4  -8   4    695.27    621.48     85.30 o
  -9  -7   4    334.97    207.16     85.30 <
  -7  -7   4     30.17     36.56     48.74 <
  -5  -7   4   3157.61   3107.40    134.04 o
  -3  -7   4      7.91     48.74     24.37 <
  -1  -7   4     20.21     24.37     12.19 <
   1  -7   4   3772.55   3789.81    158.42 o
   3  -7   4      7.61     73.12     48.74 <
 -10  -6   4    279.97    414.32    207.16 <
  -8  -6   4     95.97    158.42     60.93 <
  -4  -6   4   1900.40   1913.18     97.49 o
  -2  -6   4   2392.87   2400.62     85.30 o
   0  -6   4   3260.62   3204.89    109.67 o
   2  -6   4   1808.34   1669.47     85.30 o
   4  -6   4    279.59    170.60     48.74 o
   6  -6   4   1475.28   1084.54    170.60 o
  -9  -5   4    104.58     60.93     60.93 <
  -7  -5   4   1717.49   1840.07     97.49 o
  -5  -5   4    322.61    353.39     48.74 o
  -3  -5   4    163.18    146.23     24.37 o
  -1  -5   4    467.06    463.06     60.93 o
   1  -5   4   1026.82   1084.54     60.93 o
   3  -5   4   2774.73   2851.50    134.04 o
   5  -5   4    187.34    231.53     60.93 o
 -10  -4   4    940.94   1279.52    146.23 o
  -8  -4   4   1883.83   2132.53    121.86 o
  -6  -4   4      7.16     48.74     36.56 <
  -4  -4   4    519.38    499.62     36.56 o
  -2  -4   4    697.18    816.45     60.93 o
   0  -4   4    489.59    475.25     36.56 o
   2  -4   4     47.73     60.93     24.37 <
   4  -4   4   1750.35   1827.88    109.67 o
   6  -4   4    135.43    207.16     97.49 <
  -9  -3   4    373.44    402.13     73.12 o
  -7  -3   4     76.24    134.04     48.74 <
  -5  -3   4   5455.62   6056.38    194.97 o
  -3  -3   4   1214.11   1279.52     60.93 o
   3  -3   4     31.08     36.56     36.56 <
   5  -3   4    900.12    901.76     73.12 o
 -10  -2   4     28.32     48.74    134.04 <
   2  -2   4   1964.47   2181.27     97.49 o
   4  -2   4   3075.31   3472.98    182.79 o
   6  -2   4    732.73    840.83    121.86 o
 -10   0   4     86.97     60.93     73.12 <
  -2   0   4  33593.10 636322.00 223623.00 <
   4   0   4   4556.81   5800.48    584.92 o
   6   0   4    513.58    731.15    182.79 o
  -9   1   4    645.13    536.18    109.67 o
  -7   1   4    324.08    304.65     48.74 o
  -5   1   4   3828.46   3290.19    219.35 o
  -3   1   4    114.88    109.67     24.37 o
  -1   1   4   1001.17   1718.21   1316.08 <
   1   1   4   4990.25   5386.16    560.55 o
   3   1   4    430.89    365.58     73.12 o
   5   1   4    981.88    999.24    170.60 o
 -10   2   4    337.77    389.95    134.04 <
  -4   2   4   3843.89   4045.71    170.60 o
  -2   2   4    818.64    804.27    146.23 o
   6   2   4    709.40    584.92    121.86 o
  -9   3   4      2.21    134.04     48.74 <
  -7   3   4     41.53     48.74     36.56 <
  -5   3   4    324.92    389.95     36.56 o
  -3   3   4    428.31    536.18     73.12 o
  -1   3   4    848.49    828.64     48.74 o
   1   3   4   1682.32   1779.14     85.30 o
   3   3   4     64.34     85.30     36.56 <
   5   3   4    109.37    109.67     48.74 <
 -10   4   4    881.50    597.11    109.67 o
  -8   4   4   2564.37   2510.29    121.86 o
  -6   4   4    411.87    389.95     48.74 o
  -4   4   4     18.24     12.19     24.37 <
  -2   4   4   3162.22   3229.26    121.86 o
   0   4   4    108.13    146.23     24.37 o
   2   4   4      2.00     12.19     24.37 <
   6   4   4     98.12     48.74     85.30 <
  -9   5   4     20.25     85.30     60.93 <
  -7   5   4    775.11    682.41     60.93 o
  -5   5   4    508.74    523.99     48.74 o
  -3   5   4     88.40    146.23     24.37 o
  -1   5   4     96.36     73.12     24.37 o
   1   5   4   1850.59   1876.63     85.30 o
   3   5   4    736.08    779.90     73.12 o
   5   5   4    281.33    268.09     73.12 o
 -10   6   4   1093.07   1255.15    255.90 o
  -8   6   4    255.84    268.09     60.93 o
  -6   6   4    568.71    389.95     60.93 o
  -4   6   4   1740.74   1742.58     85.30 o
  -2   6   4    955.20   1023.61     48.74 o
   0   6   4   2583.95   2619.96    109.67 o
   2   6   4   2721.59   2741.82    134.04 o
   4   6   4      8.12     60.93     60.93 <
  -9   7   4      6.23     73.12     85.30 <
  -7   7   4    282.10    231.53     60.93 o
  -5   7   4    177.97    146.23     48.74 o
  -3   7   4    121.62     73.12     36.56 <
  -1   7   4    109.25    170.60     48.74 o
   1   7   4    398.06    389.95     48.74 o
   3   7   4    109.91    170.60     48.74 o
   5   7   4    501.19    682.41    121.86 o
  -8   8   4      4.30     24.37     48.74 <
  -6   8   4      2.43     73.12     48.74 <
  -4   8   4   3366.13   3314.56    158.42 o
  -2   8   4   1415.07   1316.08     73.12 o
   0   8   4   1924.49   1949.74    121.86 o
   2   8   4    435.71    377.76     73.12 o
   4   8   4     62.55     24.37     60.93 <
  -7   9   4    283.90    304.65     60.93 o
  -5   9   4    132.24    109.67     60.93 <
  -3   9   4     11.79     36.56     36.56 <
  -1   9   4   1757.79   1901.00    121.86 o
   1   9   4    274.81    243.72     60.93 o
   3   9   4    724.74    743.34    109.67 o
  -8  10   4     51.61     85.30     85.30 <
  -6  10   4     75.39     73.12     60.93 <
  -4  10   4    708.24    718.97     73.12 o
  -2  10   4   1660.58   1876.63    134.04 o
   0  10   4    131.79    158.42     60.93 <
   2  10   4     12.54     24.37     60.93 <
   4  10   4     90.35    194.97    134.04 <
  -7  11   4    101.64    121.86     73.12 <
  -5  11   4    100.10     60.93     60.93 <
  -3  11   4      1.33     48.74     60.93 <
  -1  11   4    187.60    207.16     73.12 <
   1  11   4     77.76     60.93     60.93 <
   3  11   4      6.23     97.49     85.30 <
  -6  12   4      3.25      0.00     85.30 <
  -4  12   4    116.90     73.12     60.93 <
  -2  12   4    114.88     60.93     60.93 <
   0  12   4    152.39    170.60     73.12 <
   2  12   4    126.51    109.67     73.12 <
  -5  13   4      0.83     73.12     73.12 <
  -3  13   4     20.34     24.37     60.93 <
  -1  13   4    201.82    194.97     85.30 <
   1  13   4    106.97    109.67    109.67 <
  -6  14   4     15.56    158.42    194.97 <
  -4  14   4     64.04     24.37     60.93 <
  -2  14   4    199.75    146.23    121.86 <
   0  14   4      3.91     24.37    109.67 <
  -3  15   4      2.65     48.74    158.42 <
  -1  15   4      1.24     97.49    134.04 <
  -3 -15   5      3.14     60.93    146.23 <
  -4 -14   5    151.67    231.53     85.30 <
  -2 -14   5      0.25      0.00    109.67 <
   0 -14   5     84.28     60.93    182.79 <
  -5 -13   5      0.51     73.12     97.49 <
  -3 -13   5     77.16    146.23     85.30 <
  -1 -13   5    453.05    426.51     97.49 o
   1 -13   5    304.58    134.04    194.97 <
  -6 -12   5    490.24    523.99    109.67 o
  -4 -12   5    196.98    170.60     73.12 <
  -2 -12   5    764.68    597.11     73.12 o
   0 -12   5      1.71     24.37     85.30 <
   2 -12   5     32.19    134.04    194.97 <
  -7 -11   5     26.69     48.74     85.30 <
  -5 -11   5     13.93     60.93     60.93 <
  -3 -11   5    258.88    219.35     73.12 <
  -1 -11   5      4.26     48.74     73.12 <
   1 -11   5    221.61    182.79     97.49 <
   3 -11   5      2.49    158.42    109.67 <
  -6 -10   5      3.56   1316.08    597.11 <
  -4 -10   5     53.74     85.30     60.93 <
   0 -10   5    147.79    268.09     97.49 <
   2 -10   5      0.21      0.00    121.86 <
  -9  -9   5   1104.31   1437.93    329.02 o
  -7  -9   5      4.71     24.37     48.74 <
  -5  -9   5    933.12    877.38     73.12 o
  -3  -9   5   1514.89   1511.05    121.86 o
  -1  -9   5    518.19    597.11     85.30 o
   1  -9   5    656.05    804.27    109.67 o
   3  -9   5      8.68    109.67    109.67 <
  -8  -8   5    818.30    584.92     85.30 o
  -6  -8   5   1136.40   1169.84     97.49 o
  -4  -8   5    831.96    828.64     73.12 o
  -2  -8   5   2823.29   3241.44    182.79 o
   0  -8   5    204.82    268.09     60.93 o
   2  -8   5     86.07     73.12     73.12 <
   4  -8   5    716.07    658.04    146.23 o
  -9  -7   5     24.18     85.30     85.30 <
  -7  -7   5    234.59    329.02     60.93 o
  -5  -7   5    152.39    182.79     48.74 o
  -3  -7   5    249.51    268.09     36.56 o
  -1  -7   5   1087.17   1145.47     97.49 o
   1  -7   5      0.59     12.19     36.56 <
   3  -7   5     20.38     48.74     60.93 <
  -8  -6   5    337.71    365.58     73.12 o
  -4  -6   5   1793.18   1791.32     97.49 o
  -2  -6   5    879.07    901.76     73.12 o
   0  -6   5    637.60    584.92     60.93 o
   2  -6   5    229.33    170.60     48.74 o
  -9  -5   5   1404.52   1328.26    121.86 o
  -7  -5   5      1.12     24.37     48.74 <
  -5  -5   5    113.60    146.23     48.74 o
   3  -5   5    396.74    292.46     97.49 o
   5  -5   5     36.17     36.56    121.86 <
 -10  -4   5   1253.69   1511.05    194.97 o
  -8  -4   5     19.09     97.49     48.74 <
  -6  -4   5   1133.91   1047.99     73.12 o
  -4  -4   5   4620.61   4630.63    170.60 o
  -2  -4   5   1837.96  97889.20 105676.00 <
   0  -4   5   1492.14   1669.47     85.30 o
   2  -4   5   2240.45   2095.97    109.67 o
   4  -4   5    409.62    341.20     73.12 o
  -9  -3   5      0.74     97.49     48.74 <
  -7  -3   5   2715.86   2656.52    134.04 o
   1  -3   5     65.80     73.12     48.74 <
   3  -3   5    439.94    487.43     60.93 o
   5  -3   5   2028.40   1840.07    146.23 o
 -10  -2   5   1825.13   1852.25    158.42 o
  -8  -2   5   1287.22   1535.42    109.67 o
  -4  -2   5   3541.53   3631.39    146.23 o
  -2  -2   5    201.63    341.20    170.60 <
   2  -2   5    626.01    755.53     60.93 o
   4  -2   5     53.67    219.35     60.93 o
  -9  -1   5     11.71    207.16     85.30 <
   3  -1   5      0.72     36.56     60.93 <
  -2   0   5    264.47  20606.30 220126.00 <
   2   0   5   3983.85   5239.93    438.69 o
   4   0   5     65.65    121.86     73.12 <
  -9   1   5    220.76     85.30     85.30 <
  -7   1   5   1373.84   1474.49    158.42 o
  -5   1   5   1759.76   1474.49    134.04 o
  -3   1   5   1218.66   1047.99    816.45 <
  -1   1   5   6540.83   5922.34   1084.54 o
   1   1   5   1070.75    950.50    170.60 o
   3   1   5      2.09     24.37     60.93 <
   5   1   5   2990.82   2717.45    389.95 o
  -8   2   5    892.37   1206.40    109.67 o
  -6   2   5    342.20    389.95     48.74 o
  -2   2   5   1113.73    755.53    170.60 o
   2   2   5    116.46    219.35     48.74 o
   4   2   5    613.13    414.32     73.12 o
  -9   3   5    339.01    304.65     60.93 o
  -7   3   5    833.94    718.97     73.12 o
  -5   3   5   4104.74   4594.08    194.97 o
  -1   3   5   4582.18   5227.74    219.35 o
   1   3   5    317.83    292.46     48.74 o
   3   3   5    870.07    804.27     73.12 o
   5   3   5   1352.72   1474.49    182.79 o
 -10   4   5   1624.59   2181.27    292.46 o
  -8   4   5    521.96    536.18     60.93 o
  -6   4   5      1.89     73.12     48.74 <
  -4   4   5   5879.92   6604.75    231.53 o
  -2   4   5    516.03    560.55    134.04 o
   0   4   5   2504.10   2437.18    109.67 o
   2   4   5   1724.01   1559.79     97.49 o
   4   4   5     96.81     85.30     60.93 <
  -9   5   5   1665.21   1364.82    121.86 o
  -7   5   5      0.50     48.74     48.74 <
  -5   5   5   1111.53   1169.84     73.12 o
  -3   5   5   6026.29   6726.61    316.83 o
  -1   5   5   2278.93   2217.83     97.49 o
   1   5   5   2171.14   2144.72    109.67 o
   3   5   5    990.78    865.20     85.30 o
  -8   6   5    680.23    633.67     73.12 o
  -6   6   5   5299.59   4996.21    219.35 o
  -4   6   5    413.06    292.46     48.74 o
  -2   6   5   4961.93   5191.18    182.79 o
   0   6   5   1052.16    938.31     73.12 o
   2   6   5    154.40    121.86     60.93 <
   4   6   5   1055.77   1072.36    146.23 o
  -9   7   5    197.87    243.72     85.30 <
  -7   7   5    169.90    182.79     60.93 <
  -5   7   5    149.34     73.12     48.74 <
  -3   7   5    155.28    182.79     36.56 o
  -1   7   5    123.74     73.12     48.74 <
   1   7   5    950.41    816.45     73.12 o
   3   7   5      4.88     60.93     60.93 <
  -8   8   5   1283.87   1255.15    109.67 o
  -6   8   5    462.18    438.69     73.12 o
  -4   8   5     42.76     48.74     48.74 <
  -2   8   5   1639.51   1571.98    121.86 o
   0   8   5    448.76    402.13     60.93 o
   2   8   5    144.59     85.30     97.49 <
   4   8   5    694.31    840.83    170.60 o
  -9   9   5   1315.29   1425.75    329.02 o
  -7   9   5     26.62     60.93     60.93 <
  -5   9   5     87.32     48.74     48.74 <
  -3   9   5   3878.41   4179.76    219.35 o
  -1   9   5     71.55    134.04     60.93 <
   1   9   5    324.07    304.65     85.30 o
   3   9   5   1407.05   1462.31    207.16 o
  -8  10   5      1.76     12.19    121.86 <
  -6  10   5    101.16    121.86     60.93 <
  -4  10   5    326.67    438.69     85.30 o
  -2  10   5      5.97     85.30     60.93 <
   0  10   5    166.66     97.49     60.93 <
   2  10   5    112.75    109.67    109.67 <
  -7  11   5    229.93    146.23     85.30 <
  -5  11   5      1.02     24.37     60.93 <
  -3  11   5    155.83     73.12     73.12 <
  -1  11   5     99.85    158.42     73.12 <
   1  11   5    240.01    207.16     97.49 <
  -6  12   5    251.20    365.58     97.49 o
  -4  12   5     63.55     73.12     85.30 <
  -2  12   5    713.72    974.87    109.67 o
   0  12   5     19.73     36.56    109.67 <
  -5  13   5    147.67     97.49    109.67 <
  -3  13   5    664.52    792.08    134.04 o
  -1  13   5    452.11    682.41    158.42 o
  -4  14   5    555.48    597.11    194.97 o
  -2  14   5     76.14    121.86    121.86 <
  -2 -14   6    223.48    231.53    158.42 <
  -5 -13   6    259.69    658.04    329.02 <
  -3 -13   6    212.26     73.12    109.67 <
  -6 -12   6    313.14      0.00    255.90 <
  -4 -12   6      9.19     36.56     85.30 <
  -2 -12   6    169.41    121.86     85.30 <
   0 -12   6    204.23    499.62    219.35 <
  -7 -11   6    414.30    292.46    158.42 <
  -5 -11   6      0.02     24.37     73.12 <
  -3 -11   6   1632.79   1876.63    158.42 o
  -1 -11   6     46.37     48.74     85.30 <
   1 -11   6    403.52    207.16    207.16 <
  -8 -10   6    272.48    182.79    243.72 <
  -6 -10   6      0.58     60.93     60.93 <
  -4 -10   6    499.68    499.62     85.30 o
  -2 -10   6    710.77    889.57    109.67 o
   0 -10   6      0.32     60.93     73.12 <
   2 -10   6    322.23    292.46    121.86 <
  -7  -9   6    105.80    158.42     73.12 <
  -5  -9   6      5.38    121.86     60.93 <
  -3  -9   6   3702.40   3619.21    207.16 o
  -1  -9   6     27.67     60.93     60.93 <
   1  -9   6    393.48    268.09     97.49 <
  -8  -8   6     44.70     24.37     60.93 <
  -4  -8   6     33.73     97.49     48.74 <
  -2  -8   6    558.28    645.85     85.30 o
   0  -8   6   1812.20   1827.88    194.97 o
   2  -8   6    279.85     48.74    109.67 <
  -9  -7   6    225.96    219.35    134.04 <
  -7  -7   6      3.71     12.19     60.93 <
  -5  -7   6   1472.59   1291.70     85.30 o
  -3  -7   6   2293.57   2315.32    121.86 o
  -1  -7   6   1019.67   1047.99     97.49 o
   1  -7   6    154.03    146.23     97.49 <
   3  -7   6    118.51    231.53     85.30 <
  -8  -6   6     27.87     48.74     60.93 <
  -6  -6   6    165.93    243.72     60.93 o
  -4  -6   6    215.40    182.79     48.74 o
  -2  -6   6    225.67    365.58     73.12 o
   0  -6   6    847.47    792.08     73.12 o
   2  -6   6     24.29     48.74     60.93 <
  -9  -5   6    539.83    426.51     73.12 o
  -7  -5   6     57.10     60.93     60.93 <
  -5  -5   6    256.71    268.09     48.74 o
  -1  -5   6    263.88    304.65     48.74 o
   1  -5   6     14.52     60.93     48.74 <
   3  -5   6   1686.15   1511.05    121.86 o
 -10  -4   6     26.40      0.00    158.42 <
  -8  -4   6    197.71    243.72     60.93 o
  -6  -4   6   1154.18   1169.84     85.30 o
  -4  -4   6     72.20     97.49     36.56 <
  -2  -4   6    329.94    219.35    109.67 <
   0  -4   6   1061.19    999.24     73.12 o
   2  -4   6    142.56    121.86     60.93 <
   4  -4   6      2.30     36.56    170.60 <
  -9  -3   6   1101.64   1169.84     97.49 o
  -7  -3   6      7.89     73.12     48.74 <
  -5  -3   6   2616.35   2754.01    121.86 o
  -3  -3   6   1950.50  11978.70 143160.00 <
   1  -3   6    494.66    499.62     60.93 o
   3  -3   6   1045.67   1035.80     97.49 o
 -10  -2   6     53.21     24.37    767.71 <
  -8  -2   6    410.66    353.39     73.12 o
  -6  -2   6    506.87    706.78     85.30 o
  -2  -2   6    498.06   7262.78 113597.00 <
   2  -2   6    873.36    877.38     97.49 o
   4  -2   6    951.64    658.04    182.79 o
  -9  -1   6      0.27    329.02    121.86 <
  -7  -1   6     31.84    109.67     73.12 <
  -3  -1   6   1232.82 109039.00 193366.00 <
   1  -1   6    148.99     48.74     85.30 <
 -10   0   6     70.38      0.00    779.90 <
  -8   0   6    621.31    999.24    255.90 o
  -6   0   6    154.26    134.04     48.74 <
  -2   0   6   2517.51  63330.00 186066.00 <
   0   0   6    109.15    158.42     73.12 <
   2   0   6   1512.42   1937.55    329.02 o
   4   0   6    303.85    329.02    158.42 <
  -9   1   6    661.73    463.06    121.86 o
  -7   1   6    209.71    121.86     73.12 <
  -5   1   6   2192.61   2546.85    219.35 o
  -3   1   6   9546.55 161024.00 200251.00 <
  -1   1   6    856.31   1559.79    329.02 o
   1   1   6      0.98     12.19     85.30 <
   3   1   6    972.88    779.90    158.42 o
 -10   2   6    216.15    280.27    779.90 <
  -8   2   6     40.45     97.49     73.12 <
  -6   2   6    657.63    731.15     85.30 o
  -2   2   6     27.95    170.60  98181.60 <
   0   2   6    695.13    743.34     73.12 o
   2   2   6     94.04     73.12     60.93 <
   4   2   6    464.17    658.04    207.16 o
  -9   3   6    323.64    219.35     60.93 o
  -7   3   6      4.78     24.37     48.74 <
  -5   3   6     72.73    170.60     36.56 o
  -1   3   6     20.98    121.86     36.56 o
   1   3   6     89.42    121.86     48.74 <
   3   3   6    469.51    365.58     73.12 o
 -10   4   6     81.29    207.16    158.42 <
  -8   4   6    338.21    353.39     73.12 o
  -6   4   6    104.62     24.37     48.74 <
  -2   4   6    113.93     97.49     36.56 <
   0   4   6    163.02     73.12     36.56 <
   2   4   6    165.97     48.74     48.74 <
   4   4   6    347.47     48.74    182.79 <
  -9   5   6    783.43    621.48     85.30 o
  -7   5   6     24.62     85.30     60.93 <
  -5   5   6    832.13    840.83     73.12 o
  -3   5   6   1415.77   1693.84     97.49 o
  -1   5   6    483.16    463.06     60.93 o
   1   5   6    292.80    243.72     60.93 o
   3   5   6   2236.83   1876.63    146.23 o
  -8   6   6    352.23    414.32     73.12 o
  -6   6   6    370.90    341.20     60.93 o
  -4   6   6    223.34    207.16     48.74 o
  -2   6   6    109.58    121.86     60.93 <
   0   6   6   1506.32   1523.23    109.67 o
   2   6   6    102.49    109.67     60.93 <
  -9   7   6      4.80     36.56     97.49 <
  -7   7   6      0.00     36.56     60.93 <
  -5   7   6      6.19     24.37     48.74 <
  -3   7   6    208.29    182.79     60.93 <
  -1   7   6     70.64     36.56     73.12 <
   1   7   6     46.38     12.19     85.30 <
   3   7   6     64.79    219.35    146.23 <
  -8   8   6     37.32    134.04     73.12 <
  -6   8   6    409.12    365.58     73.12 o
  -4   8   6    212.01    231.53     60.93 o
  -2   8   6      9.46     12.19     48.74 <
   0   8   6    789.48    926.13    146.23 o
   2   8   6    143.64     97.49    109.67 <
  -7   9   6     36.47     48.74     73.12 <
  -5   9   6    981.97    962.68     85.30 o
  -3   9   6   1554.36   1681.65    146.23 o
  -1   9   6    139.02    121.86     73.12 <
   1   9   6      0.98     36.56     73.12 <
  -6  10   6    157.03    134.04     73.12 <
  -4  10   6     17.34     36.56     73.12 <
  -2  10   6    506.92    597.11     97.49 o
   0  10   6    163.32    243.72     97.49 <
   2  10   6    182.79    292.46    255.90 <
  -5  11   6    155.84    182.79     85.30 <
  -3  11   6    162.83    219.35     85.30 <
  -1  11   6      2.49     24.37     73.12 <
  -6  12   6      1.72      0.00    280.27 <
  -4  12   6      4.67     12.19    109.67 <
  -2  12   6      0.66     60.93    121.86 <
  -5  13   6     32.04      0.00    329.02 <
  -3  13   6    138.97    182.79    146.23 <
  -4 -12   7     29.60     36.56    146.23 <
  -2 -12   7    622.01    268.09    207.16 <
  -5 -11   7    973.17    987.06    170.60 o
  -3 -11   7     72.27     48.74     73.12 <
  -1 -11   7    575.23    548.36    194.97 <
  -6 -10   7    282.66    438.69    146.23 <
  -4 -10   7     74.48    146.23     85.30 <
  -2 -10   7      0.17     60.93     73.12 <
   0 -10   7     49.97     85.30     97.49 <
  -7  -9   7     34.88    121.86    134.04 <
  -5  -9   7   2100.53   1913.18    158.42 o
  -3  -9   7     14.69     97.49     73.12 <
  -1  -9   7     15.50      0.00     97.49 <
   1  -9   7    705.84    523.99    109.67 o
  -8  -8   7   2058.98   2120.34    292.46 o
  -6  -8   7    168.70    182.79     60.93 <
  -4  -8   7    128.48     97.49     73.12 <
  -2  -8   7   3199.01   3070.84    268.09 o
   0  -8   7    111.77    304.65    121.86 <
  -7  -7   7    136.74     97.49     73.12 <
  -5  -7   7    942.01    962.68     85.30 o
  -3  -7   7    104.71    170.60     97.49 <
  -1  -7   7      1.89     73.12     85.30 <
   1  -7   7    391.73    219.35    109.67 <
  -8  -6   7    244.01    219.35     85.30 <
  -6  -6   7    739.56    743.34     73.12 o
  -4  -6   7    966.12    877.38     85.30 o
   0  -6   7    228.03    134.04     60.93 <
   2  -6   7    376.50    304.65    121.86 <
  -9  -5   7    547.77    243.72    121.86 <
  -7  -5   7      0.07     73.12     60.93 <
  -5  -5   7   1942.31   2010.67    121.86 o
  -3  -5   7    165.33    231.53     85.30 <
  -1  -5   7    617.71    597.11     85.30 o
   1  -5   7   2396.81   2559.03    182.79 o
  -8  -4   7   1379.66   1291.70    121.86 o
  -6  -4   7      1.88     36.56     48.74 <
   0  -4   7   1135.21   1230.77    121.86 o
   2  -4   7     38.22     12.19     73.12 <
  -9  -3   7     69.57    207.16     97.49 <
  -7  -3   7   3846.74   3923.85    194.97 o
  -5  -3   7      2.91     97.49     48.74 <
  -3  -3   7   2084.05 116546.00 187053.00 <
   1  -3   7     84.32     48.74     60.93 <
 -10  -2   7   1585.17   1486.68   2083.79 <
  -6  -2   7    792.00    779.90     97.49 o
  -4  -2   7   1518.22  18132.60 233701.00 <
   0  -2   7   1593.90   1840.07    134.04 o
   2  -2   7    265.59    365.58    134.04 <
  -9  -1   7    150.42     85.30    621.48 <
  -3  -1   7    216.20   1645.09 195754.00 <
   1  -1   7     17.80    268.09     85.30 o
  -8   0   7     10.46     60.93     85.30 <
  -4   0   7   3913.36  31927.00  28161.60 <
  -2   0   7     10.78   2546.85 180266.00 <
   0   0   7   2110.11   2729.64    304.65 o
   2   0   7    757.18    548.36   1023.61 <
  -9   1   7     36.32    146.23    633.67 <
  -7   1   7   1491.36   1255.15    146.23 o
  -5   1   7    537.41    511.81     85.30 o
  -3   1   7    190.91    901.76 187358.00 <
  -1   1   7   2097.61   2144.72    280.27 o
   1   1   7    272.56    182.79     85.30 <
 -10   2   7      8.18    170.60   2095.97 <
  -8   2   7   1165.08    913.94    121.86 o
  -6   2   7     25.33    109.67     85.30 <
  -4   2   7     51.45  12563.60 140138.00 <
  -2   2   7   1433.34   1535.42    170.60 o
   2   2   7    256.95    170.60    134.04 <
  -9   3   7    181.24    158.42     85.30 <
  -7   3   7   1006.86    853.01     85.30 o
  -5   3   7    701.99    755.53     73.12 o
  -3   3   7   1319.75  17157.70 157161.00 <
  -1   3   7    655.46    682.41     73.12 o
   1   3   7    321.93    341.20     73.12 o
  -8   4   7     40.44    134.04     85.30 <
  -6   4   7    422.83    402.13     60.93 o
   0   4   7   1618.56   1474.49    134.04 o
   2   4   7     55.63    109.67    109.67 <
  -9   5   7   1487.57   1291.70    194.97 o
  -7   5   7    644.50    597.11     73.12 o
  -3   5   7    229.08    146.23     48.74 o
  -1   5   7      0.80     73.12     60.93 <
   1   5   7   3140.88   2985.54    207.16 o
  -8   6   7   2056.62   2059.41    170.60 o
  -6   6   7   1677.35   1437.93    109.67 o
  -4   6   7    651.63    718.97     85.30 o
  -2   6   7   3764.96   3667.95    292.46 o
   0   6   7    122.16     36.56     97.49 <
   2   6   7    655.64    682.41    194.97 o
  -7   7   7     23.34     48.74     60.93 <
  -5   7   7    151.66     60.93     60.93 <
  -3   7   7      0.99     97.49     97.49 <
  -1   7   7    105.57     36.56     97.49 <
   1   7   7    103.30     73.12    109.67 <
  -6   8   7     99.76    109.67     60.93 <
  -4   8   7    637.90    621.48    134.04 o
  -2   8   7   1241.16   1121.10    170.60 o
   0   8   7    447.46    389.95    121.86 o
  -7   9   7     15.62      0.00    146.23 <
  -5   9   7   1342.66   1352.63    134.04 o
  -3   9   7    904.23    792.08    121.86 o
  -1   9   7     24.59     36.56     97.49 <
  -6  10   7     19.53     73.12    182.79 <
  -4  10   7     83.72    134.04     85.30 <
  -2  10   7    113.27    158.42    121.86 <
  -5  11   7     13.22    134.04    134.04 <
  -3  11   7    127.94    158.42    134.04 <
  -5  -9   8    625.14    658.04    243.72 <
  -3  -9   8    671.84    597.11    146.23 o
  -6  -8   8    171.68    182.79    134.04 <
  -4  -8   8    248.08    207.16    109.67 <
  -2  -8   8    352.00    243.72    146.23 <
  -7  -7   8   1565.08   1352.63    207.16 o
  -5  -7   8      0.01      0.00     97.49 <
  -3  -7   8     66.80    109.67     85.30 <
  -1  -7   8   1765.35   2022.86    194.97 o
  -8  -6   8     17.13     36.56    194.97 <
  -6  -6   8     48.08     85.30     73.12 <
  -4  -6   8     46.44     24.37     85.30 <
  -2  -6   8    150.28    268.09    109.67 <
  -7  -5   8    267.40    341.20     73.12 o
  -5  -5   8      4.99     73.12     60.93 <
  -3  -5   8      4.77    194.97     97.49 <
  -1  -5   8    471.93    706.78    109.67 o
  -8  -4   8     14.75     97.49    109.67 <
  -6  -4   8    250.14    243.72     73.12 o
  -2  -4   8    433.56    706.78    170.60 o
   0  -4   8     64.79     73.12     85.30 <
  -9  -3   8   1742.64   2498.11    414.32 o
  -7  -3   8   1619.63   1450.12    121.86 o
  -5  -3   8      1.08     36.56     48.74 <
  -1  -3   8   3209.28   3497.35    194.97 o
   1  -3   8    564.61    426.51    219.35 <
  -8  -2   8    101.39     60.93    109.67 <
  -6  -2   8    125.52    146.23    134.04 <
  -4  -2   8    125.21   3838.55 201628.00 <
   0  -2   8    293.22    268.09     85.30 o
  -3  -1   8     25.16  14318.40 191026.00 <
   1  -1   8      0.04    694.59   2022.86 <
  -8   0   8      0.40     73.12    134.04 <
  -6   0   8     47.17     48.74     73.12 <
  -4   0   8   1154.33  33145.60 204369.00 <
  -2   0   8    127.10    353.39    901.76 <
   0   0   8    171.33    109.67     85.30 <
  -7   1   8   1594.86   1535.42    158.42 o
  -5   1   8    358.78    438.69     85.30 o
  -3   1   8   1749.25  13209.50 199812.00 <
   1   1   8   1246.07    670.22   2035.04 <
  -8   2   8     49.62    109.67    109.67 <
  -6   2   8    104.84    341.20    134.04 <
  -4   2   8    342.05   4057.90 197545.00 <
  -2   2   8      5.17    304.65    109.67 <
   0   2   8     13.86      0.00     60.93 <
  -9   3   8    157.52    280.27    194.97 <
  -7   3   8    126.42    109.67     60.93 <
  -5   3   8    130.85    121.86     60.93 <
  -3   3   8     34.94    341.20    134.04 <
  -1   3   8      0.54    158.42     73.12 <
  -8   4   8     10.66     24.37     97.49 <
  -6   4   8      1.53     12.19     60.93 <
  -4   4   8     35.88    121.86     48.74 <
  -2   4   8     65.59     36.56     60.93 <
   0   4   8      2.01      0.00    109.67 <
  -7   5   8   1580.56   1328.26    158.42 o
  -5   5   8     11.81    158.42     73.12 <
  -3   5   8    104.99     73.12     85.30 <
  -1   5   8   2695.05   2534.66    207.16 o
  -8   6   8    196.37      0.00    207.16 <
  -6   6   8     26.27     24.37     73.12 <
  -4   6   8     20.62    109.67     85.30 <
  -2   6   8     10.47     97.49     97.49 <
  -7   7   8      0.06      0.00    170.60 <
  -5   7   8     16.44      0.00     85.30 <
  -3   7   8      0.43     85.30     97.49 <
  -6   8   8      8.01    207.16    219.35 <
  -4   8   8     81.98    121.86    121.86 <
  -2   8   8     19.36     24.37    182.79 <
  -5  -5   9    776.57    560.55    255.90 <
  -6  -4   9    339.23    584.92    158.42 o
  -2  -4   9     50.87    182.79    194.97 <
  -7  -3   9    595.25    511.81    146.23 o
  -6  -2   9   1432.93   1657.28   1693.84 <
  -4  -2   9    933.74   1693.84 155772.00 <
  -2  -2   9    425.84   1121.10   1974.11 <
  -7  -1   9     18.37     24.37    938.31 <
  -5  -1   9     12.92     12.19 206319.00 <
  -3  -1   9    374.76   6166.06   3034.28 <
  -6   0   9   3500.37   5130.26    767.71 o
  -7   1   9     42.56    194.97    938.31 <
  -5   1   9      8.23     36.56 162036.00 <
  -3   1   9   2153.88   2595.59   2668.71 <
  -6   2   9    121.80   1596.35   1693.84 <
  -4   2   9     44.45    621.48 259803.00 <
  -2   2   9    731.78    670.22   1974.11 <
  -7   3   9    424.80    389.95    182.79 <
  -2   4   9     89.04    365.58    182.79 <

#===============================================================================
data_magnetite_film
#===============================================================================

# 1. CHEMICAL DATA

_chemical_name_mineral                   magnetite
_chemical_formula_sum                    'Fe2.851 O4'
_chemical_formula_weight                 223.2
_chemical_compound_source                'Harts Range, Australia'

#===============================================================================

# 2. CRYSTAL DATA

_space_group_crystal_system              trigonal
_space_group_name_H-M_alt                'F 1 -3 2/m'
_space_group_name_Hall                   '-F 3* 2'
_space_group_IT_number                   166

loop_
 _space_group_symop_id
 _space_group_symop_operation_xyz
 1   x,y,z
 2   y,z,x
 3   z,x,y
 4   -x,-z,-y
 5   -y,-x,-z
 6   -z,-y,-x
 7   -x,-y,-z
 8   -y,-z,-x
 9   -z,-x,-y
 10  x,z,y
 11  y,x,z
 12  z,y,x
 13  x,y+1/2,z+1/2
 14  y,z+1/2,x+1/2
 15  z,x+1/2,y+1/2
 16  -x,-z+1/2,-y+1/2
 17  -y,-x+1/2,-z+1/2
 18  -z,-y+1/2,-x+1/2
 19  -x,-y+1/2,-z+1/2
 20  -y,-z+1/2,-x+1/2
 21  -z,-x+1/2,-y+1/2
 22  x,z+1/2,y+1/2
 23  y,x+1/2,z+1/2
 24  z,y+1/2,x+1/2
 25  x+1/2,y,z+1/2
 26  y+1/2,z,x+1/2
 27  z+1/2,x,y+1/2
 28  -x+1/2,-z,-y+1/2
 29  -y+1/2,-x,-z+1/2
 30  -z+1/2,-y,-x+1/2
 31  -x+1/2,-y,-z+1/2
 32  -y+1/2,-z,-x+1/2
 33  -z+1/2,-x,-y+1/2
 34  x+1/2,z,y+1/2
 35  y+1/2,x,z+1/2
 36  z+1/2,y,x+1/2
 37  x+1/2,y+1/2,z
 38  y+1/2,z+1/2,x
 39  z+1/2,x+1/2,y
 40  -x+1/2,-z+1/2,-y
 41  -y+1/2,-x+1/2,-z
 42  -z+1/2,-y+1/2,-x
 43  -x+1/2,-y+1/2,-z
 44  -y+1/2,-z+1/2,-x
 45  -z+1/2,-x+1/2,-y
 46  x+1/2,z+1/2,y
 47  y+1/2,x+1/2,z
 48  z+1/2,y+1/2,x

_cell_length_a                           8.4064(16)
_cell_length_b                           8.4064(16)
_cell_length_c                           8.4064(16)
_cell_angle_alpha                        90.53(2)
_cell_angle_beta                         90.53(2)
_cell_angle_gamma                        90.53(2)
_cell_volume                             594.0(2)

loop_
 _twin_individual_id
 _twin_individual_mass_fraction_refined
 _twin_individual_twin_matrix_11
 _twin_individual_twin_matrix_12
 _twin_individual_twin_matrix_13
 _twin_individual_twin_matrix_21
 _twin_individual_twin_matrix_22
 _twin_individual_twin_matrix_23
 _twin_individual_twin_matrix_31
 _twin_individual_twin_matrix_32
 _twin_individual_twin_matrix_33
1 0.6050(15)
1 0 0
0 1 0
0 0 1
2 0.3950(15)
-1/3 2/3 2/3
2/3 -1/3 2/3
2/3 2/3 -1/3

_cell_formula_units_Z                    8
_cell_measurement_reflns_used            4395
_cell_measurement_theta_min              4.19
_cell_measurement_theta_max              28.85
_cell_measurement_temperature            100
_cell_special_details
;
The reflections are indexed and integrated using a single hexagonal unit cell,
which covers all the reflections from both twin domains, and peaks from all the
other phases are ignored. The unit cell is transformed back to the pseudo-cubic
axis in the structure refinement. No significant overlap with the feldspar
domains is noticable in the structure refinement.
;
_exptl_crystal_description               'thin film'
_exptl_crystal_density_diffrn            4.9922
_exptl_crystal_F_000                     849
_exptl_absorpt_coefficient_mu            13.576

#===============================================================================

# 3. EXPERIMENTAL DATA

_diffrn_ambient_temperature              100
_diffrn_source                           'Mo microfocus Rotating Anode'
_diffrn_source_power                     2.5
_diffrn_source_voltage                   50
_diffrn_source_current                   50
_diffrn_radiation_type                   'Mo K\a'
_diffrn_radiation_wavelength             0.71073
_diffrn_radiation_monochromator          graphite
_diffrn_measurement_device               'four-circle diffractometer'
_diffrn_measurement_device_type          'Bruker CCD'
_diffrn_detector                         'APEX II'
_diffrn_detector_area_resol_mean         16.67
_diffrn_measurement_method               '5\w and 1\f scans'
_diffrn_measurement_specimen_support     'MiTeGen MicroMount 50'
_diffrn_reflns_number                    4395
_diffrn_reflns_theta_min                 4.19
_diffrn_reflns_theta_max                 28.85
_diffrn_reflns_theta_full                28.85
_diffrn_measured_fraction_theta_max      0.99
_diffrn_measured_fraction_theta_full     0.99
_diffrn_reflns_av_R_equivalents          0.107
_diffrn_reflns_av_unetI/netI             0.0187
_diffrn_reflns_limit_h_min               -11
_diffrn_reflns_limit_h_max               11
_diffrn_reflns_limit_k_min               -11
_diffrn_reflns_limit_k_max               11
_diffrn_reflns_limit_l_min               -11
_diffrn_reflns_limit_l_max               11
_diffrn_radiation_probe                  X-ray

#===============================================================================

# 4. REFINEMENT DATA

_reflns_number_total                     266
_reflns_number_gt                        193
_reflns_threshold_expression             'I>3\s(I)'
_refine_ls_structure_factor_coef         Fsqd
_refine_ls_R_factor_gt                   0.0165
_refine_ls_wR_factor_gt                  0.0398
_refine_ls_R_factor_all                  0.0264
_refine_ls_wR_factor_ref                 0.0418
_refine_ls_goodness_of_fit_ref           1.18
_refine_ls_goodness_of_fit_gt            1.34
_refine_ls_number_reflns                 266
_refine_ls_number_parameters             23
_refine_ls_number_restraints             0
_refine_ls_number_constraints            0
_refine_ls_weighting_scheme              sigma
_refine_ls_weighting_details             'w=1/(\s^2^(I)+0.0004I^2^)'
_refine_ls_shift/su_max                  0.0376
_refine_ls_shift/su_mean                 0.0163
_refine_diff_density_max                 0.51
_refine_diff_density_min                 -0.37
_refine_ls_extinction_method             'none'

loop_
 _atom_type_symbol
 _atom_type_scat_dispersion_real
 _atom_type_scat_dispersion_imag
 _atom_type_scat_source
 Fe   0.3463  0.8444
 'International Tables Vol C tables 4.2.6.8 and 6.1.1.1'
 O    0.0106  0.0060
 'International Tables Vol C tables 4.2.6.8 and 6.1.1.1'

#===============================================================================

# 5. ATOMIC COORDINATES AND DISPLACEMENT PARAMETERS

loop_
 _atom_site_label
 _atom_site_type_symbol
 _atom_site_fract_x
 _atom_site_fract_y
 _atom_site_fract_z
 _atom_site_adp_type
 _atom_site_U_iso_or_equiv
 _atom_site_site_symmetry_multiplicity
 _atom_site_occupancy
 _atom_site_calc_flag
 _atom_site_refinement_flags
 _atom_site_disorder_assembly
 _atom_site_disorder_group
  Fe-oct1 Fe 0.5 0.5 0.5 Uani 0.0108(2) 4 0.951(7) d . . .
  Fe-oct2 Fe 0.5 0.25 0.25 Uani 0.0077(2) 12 0.951(6) d . . .
  Fe-tet Fe 0.12470(6) 0.12470(6) 0.12470(6) Uani 0.00738(14) 8 0.950(7) d . . .
  O1 O 0.2557(2) 0.2557(2) 0.2557(2) Uani 0.0115(6) 8 1 d . . .
  O2 O 0.2551(2) 0.49587(16) 0.49587(16) Uani 0.0120(8) 24 1 d . . .

loop_
 _atom_site_aniso_label
 _atom_site_aniso_type_symbol
 _atom_site_aniso_U_11
 _atom_site_aniso_U_22
 _atom_site_aniso_U_33
 _atom_site_aniso_U_12
 _atom_site_aniso_U_13
 _atom_site_aniso_U_23
 Fe-oct1 Fe 0.0108(4) 0.0108(4) 0.0108(4) 0.0025(3) 0.0025(3) 0.0025(3)
 Fe-oct2 Fe 0.0068(4) 0.0082(3) 0.0082(3) -0.00072(19) -0.00072(19) 0.0005(3)
 Fe-tet Fe 0.0074(2) 0.0074(2) 0.0074(2) 0.00014(15) 0.00014(15) 0.00014(15)
 O1 O 0.0115(11) 0.0115(11) 0.0115(11) -0.0009(11) -0.0009(11) -0.0009(11)
 O2 O 0.0122(17) 0.0119(10) 0.0119(10) -0.0014(7) -0.0014(7) -0.0021(12)

#===============================================================================

# 6. MOLECULAR GEOMETRY

loop_
 _geom_bond_atom_site_label_1
 _geom_bond_atom_site_label_2
 _geom_bond_site_symmetry_1
 _geom_bond_site_symmetry_2
 _geom_bond_distance
 _geom_bond_publ_flag
  Fe-oct1 O2 . .      2.059(2)   n
  Fe-oct2 O1 . .      2.056(2)   n
  Fe-oct2 O2 . 2_555  2.0676(16) n
  Fe-tet  O1 . .      1.889(2)   n
  Fe-tet  O2 . 13_544 1.8894(18) n

loop_
 _geom_angle_atom_site_label_1
 _geom_angle_atom_site_label_2
 _geom_angle_atom_site_label_3
 _geom_angle_site_symmetry_1
 _geom_angle_site_symmetry_2
 _geom_angle_site_symmetry_3
 _geom_angle
 _geom_angle_publ_flag
  O2 Fe-oct1 O2      . . 2_555   88.61(6) n
  O2 Fe-oct1 O2      . . 5_666   91.39(6) n
  O2 Fe-oct2 O2  2_555 . 3_555   88.12(8) n
  O2 Fe-oct2 O2  2_555 . 17_655  91.88(8) n
  O1 Fe-oct2 O2      . . 2_555   87.15(7) n
  O1 Fe-oct2 O2      . . 17_655  92.85(7) n
  O1 Fe-tet  O2      . . 13_544 108.89(9) n
  O2 Fe-tet  O2 13_544 . 27_454 110.04(7) n

#===============================================================================

# 7. STRUCTURE-FACTOR LIST

loop_
 _twin_refln_datum_id
 _twin_refln_individual_id
 _twin_refln_index_h
 _twin_refln_index_k
 _twin_refln_index_l
 _twin_refln_F_squared_calc
 _twin_refln_F_squared_meas
 _twin_refln_F_squared_sigma
 _twin_refln_include_status
         1    1  -1   1   1   2431.31   2435.94     33.23 o
         2    2   1   1   1   4095.03   4189.41     86.91 o
         2    1   1   1   1   4095.03   4189.41     86.91 o
         3    2   2   0  -2  26221.40  26509.10    115.02 o
         3    1  -2   0   2  26221.40  26509.10    115.02 o
         4    1   0   0   2      0.25      7.67     15.34 <
         5    1  -2   2   2  10408.50  10426.20     94.57 o
         6    1   0   2   2  16026.80  15916.70     99.69 o
         7    2   2   2   2  15860.30  15507.70    227.49 o
         7    1   2   2   2  15860.30  15507.70    227.49 o
         8    1  -1  -1   3  40319.40  39586.00    158.48 o
         9    1  -3   1   3    506.49    513.77     23.00 o
        10    2   3   1  -1  64974.90  64464.30    158.48 o
        10    1  -1   1   3  64974.90  64464.30    158.48 o
        11    1   1   1   3  40328.90  40572.60    178.93 o
        12    2   5  -1  -1  40385.00  40621.20    235.16 o
        12    1  -3   3   3  40385.00  40621.20    235.16 o
        13    1  -1   3   3    551.05    531.66     35.79 o
        14    1   1   3   3    421.62    368.08     33.23 o
        15    2   3   3   3  38540.30  38527.80    383.41 o
        15    1   3   3   3  38540.30  38527.80    383.41 o
        16    2   2   2  -4  15802.20  15635.50    132.92 o
        16    1  -2  -2   4  15802.20  15635.50    132.92 o
        17    2   4   0  -4 197172.00 199251.00    559.78 o
        17    1  -4   0   4 197172.00 199251.00    559.78 o
        18    1  -2   0   4      0.15      0.00     15.34 <
        19    1   0   0   4  50990.30  49961.10    207.04 o
        20    1  -4   2   4      0.37    -25.56     23.00 <
        21    1  -2   2   4   9587.79   9582.74     71.57 o
        22    2   4   2   0      8.65      2.56     15.34 <
        22    1   0   2   4      8.65      2.56     15.34 <
        23    1   2   2   4   8871.16   8695.78    104.80 o
        24    1  -4   4   4  17688.70  17506.60    227.49 o
        25    2   6   0   0      8.49    -17.89     35.79 <
        25    1  -2   4   4      8.49    -17.89     35.79 <
        26    1   0   4   4 118012.00 116424.00    426.86 o
        27    1   2   4   4      0.66     -5.11     33.23 <
        28    2   4   4   4  29202.10  41078.70    539.33 o
        28    1   4   4   4  29202.10  41078.70    539.33 o
        29    1  -3  -3   5  17714.60  17473.30    194.26 o
        30    1  -3  -1   5    762.21    797.50     38.34 o
        31    2   3   3  -3  42547.00  42829.60    227.49 o
        31    1  -1  -1   5  42547.00  42829.60    227.49 o
        32    1  -5   1   5    901.65    889.52     51.12 o
        33    2   5   1  -3   1353.25   1370.06     46.01 o
        33    1  -3   1   5   1353.25   1370.06     46.01 o
        34    1  -1   1   5  29224.80  29497.10    140.58 o
        35    1   1   1   5  28895.60  28372.50    207.04 o
        36    2   7  -1  -3  21392.40  21133.70    186.59 o
        36    1  -5   3   5  21392.40  21133.70    186.59 o
        37    1  -3   3   5  17588.70  17652.30    150.81 o
        38    1  -1   3   5    644.07    618.57     33.23 o
        39    2   5   3   1   1150.58   1109.34     40.90 o
        39    1   1   3   5   1150.58   1109.34     40.90 o
        40    1   3   3   5  15649.50  15341.60    186.59 o
        41    1  -5   5   5  12232.60  12182.30    232.60 o
        42    1  -3   5   5  14419.80  15497.50    245.38 o
        43    2   7   1   1   1025.96    978.98     76.68 o
        43    1  -1   5   5   1025.96    978.98     76.68 o
        44    1   1   5   5   1216.22   1101.67     69.01 o
        45    1   3   5   5  13976.80  13887.20    207.04 o
        46    2   5   5   5  20887.50  22539.50    610.90 o
        46    1   5   5   5  20887.50  22539.50    610.90 o
        47    1  -4  -4   6      0.57     30.67     61.35 <
        48    2   4   2  -6   8096.93   8069.54    115.02 o
        48    1  -4  -2   6   8096.93   8069.54    115.02 o
        49    1  -2  -2   6   8237.79   8358.37    143.14 o
        50    2   6   0  -6   6376.17   6474.54    176.37 o
        50    1  -6   0   6   6376.17   6474.54    176.37 o
        51    1  -4   0   6      0.01    -17.89     30.67 <
        52    1  -2   0   6   6550.19   6500.11     86.91 o
        53    2   4   4  -2      6.36      7.67     33.23 <
        53    1   0   0   6      6.36      7.67     33.23 <
        54    1  -6   2   6   5503.74   5569.69    120.14 o
        55    1  -4   2   6   5008.76   5122.38     97.13 o
        56    2   6   2  -2  12858.30  13583.00    117.58 o
        56    1  -2   2   6  12858.30  13583.00    117.58 o
        57    1   0   2   6   5927.21   5942.88     81.79 o
        58    1   2   2   6   7702.18   7928.95    150.81 o
        59    1  -6   4   6   2740.78   2650.65    109.91 o
        60    2   8   0  -2      6.66     10.22     43.45 <
        60    1  -4   4   6      6.66     10.22     43.45 <
        61    1  -2   4   6   4592.53   4526.81     97.13 o
        62    1   0   4   6      0.01    -23.00     30.67 <
        63    2   6   4   2   8854.91   8596.09    122.69 o
        63    1   2   4   6   8854.91   8596.09    122.69 o
        64    1   4   4   6     16.39     -5.11     58.79 <
        65    2  10  -2  -2   6004.79   5344.76    235.16 o
        65    1  -6   6   6   6004.79   5344.76    235.16 o
        66    1  -4   6   6   2454.94   2423.16    150.81 o
        67    1  -2   6   6   5211.85   4920.45    158.48 o
        68    2   8   2   2   6895.74   6773.61    184.04 o
        68    1   0   6   6   6895.74   6773.61    184.04 o
        69    1   2   6   6   4455.16   4652.06    148.25 o
        70    1   4   6   6   2026.09   2111.32    145.70 o
        71    2   6   6   6   5189.69   5084.04    475.43 o
        71    1   6   6   6   5189.69   5084.04    475.43 o
        72    2   3   3  -9    403.64    375.74     97.13 o
        72    1  -5  -5   7    403.64    375.74     97.13 o
        73    1  -5  -3   7    143.55    132.92     53.68 <
        74    1  -3  -3   7     80.76     38.34     58.79 <
        75    1  -5  -1   7   9906.71   9820.45    150.81 o
        76    2   5   3  -5  20523.40  20535.50    184.04 o
        76    1  -3  -1   7  20523.40  20535.50    184.04 o
        77    1  -1  -1   7    288.81    322.07     56.23 o
        78    1  -7   1   7     51.57     28.12     58.79 <
        79    2   7   1  -5  15829.10  16080.30    194.26 o
        79    1  -5   1   7  15829.10  16080.30    194.26 o
        80    1  -3   1   7  11503.00  11671.10    135.47 o
        81    1  -1   1   7    223.22    227.49     35.79 o
        82    2   5   5  -1    779.08    733.59     63.90 o
        82    1   1   1   7    779.08    733.59     63.90 o
        83    2   9  -1  -5  10018.00   9713.10    217.27 o
        83    1  -7   3   7  10018.00   9713.10    217.27 o
        84    1  -5   3   7    170.76    204.49     58.79 o
        85    1  -3   3   7     76.80     81.79     46.01 <
        86    2   7   3  -1  20178.10  20594.30    171.26 o
        86    1  -1   3   7  20178.10  20594.30    171.26 o
        87    1   1   3   7  10488.50  10513.10    135.47 o
        88    1   3   3   7    165.91    125.25     74.13 <
        89    1  -7   5   7   4695.32   4575.38    434.53 o
        90    1  -5   5   7    176.63    224.93     66.46 o
        91    2   9   1  -1    406.70    406.42     63.90 o
        91    1  -3   5   7    406.70    406.42     63.90 o
        92    1  -1   5   7   8772.10   8580.75    140.58 o
        93    1   1   5   7   9291.43   9199.32    148.25 o
        94    2   7   5   3    126.77    138.03     51.12 <
        94    1   3   5   7    126.77    138.03     51.12 <
        95    1   5   5   7    122.21    104.80    102.24 <
        96    2  11  -1  -1   8354.65   9380.81    700.36 o
        96    1  -5   7   7   8354.65   9380.81    700.36 o
        97    1  -3   7   7   4867.43   4946.01    212.15 o
        98    1  -1   7   7    109.73    168.70     92.02 <
        99    2   9   3   3    102.17    178.93     94.57 <
        99    1   1   7   7    102.17    178.93     94.57 <
       100    1   3   7   7   6045.15   5656.60    276.06 o
       101    1   5   7   7   3788.28   3811.11    636.46 o
       102    1  -6  -4   8      0.54    -81.79     89.46 <
       103    2   4   4  -8  55881.90  57225.50    649.24 o
       103    1  -4  -4   8  55881.90  57225.50    649.24 o
       104    2   6   2  -8   3774.59   3675.64    143.14 o
       104    1  -6  -2   8   3774.59   3675.64    143.14 o
       105    1  -4  -2   8      1.13    -25.56     51.12 <
       106    1  -2  -2   8   3664.04   3397.03    143.14 o
       107    2   8   0  -8  37115.20  42369.50   1418.62 o
       107    1  -8   0   8  37115.20  42369.50   1418.62 o
       108    1  -6   0   8      0.97    -12.78     61.35 <
       109    1  -4   0   8   8874.42   9145.65    150.81 o
       110    2   6   4  -4      8.32    -28.12     40.90 <
       110    1  -2   0   8      8.32    -28.12     40.90 <
       111    1   0   0   8  56881.80  57708.60    483.10 o
       112    1  -6   2   8   2285.24   2200.78    125.25 o
       113    2   8   2  -4      7.81      2.56     51.12 <
       113    1  -4   2   8      7.81      2.56     51.12 <
       114    1  -2   2   8   3514.69   3550.39    102.24 o
       115    1   0   2   8      1.70     15.34     40.90 <
       116    2   6   6   0   6754.65   7036.88    168.70 o
       116    1   2   2   8   6754.65   7036.88    168.70 o
       117    2  10   0  -4      6.59     28.12     76.68 <
       117    1  -6   4   8      6.59     28.12     76.68 <
       118    1  -4   4   8  33624.00  33400.30    319.51 o
       119    1  -2   4   8      3.88     35.79     53.68 <
       120    2   8   4   0  14721.70  14048.20    173.81 o
       120    1   0   4   8  14721.70  14048.20    173.81 o
       121    1   2   4   8     25.32     35.79     51.12 <
       122    1   4   4   8  33245.50  32434.10    419.20 o
       123    1  -4   6   8      0.52     17.89     81.79 <
       124    2  10   2   0   4219.59   4289.10    161.03 o
       124    1  -2   6   8   4219.59   4289.10    161.03 o
       125    1   0   6   8     13.86    -10.22     61.35 <
       126    1   2   6   8   1800.55   1904.28    112.47 o
       127    2   8   6   4      6.10    145.70    122.69 <
       127    1   4   6   8      6.10    145.70    122.69 <
       128    1  -5  -3   9    274.83    375.74     84.35 o
       129    2   5   5  -7    404.38    265.83     97.13 <
       129    1  -3  -3   9    404.38    265.83     97.13 <
       130    2   7   3  -7  10752.80  10901.70    219.82 o
       130    1  -5  -1   9  10752.80  10901.70    219.82 o
       131    1  -3  -1   9   8553.66   8452.95    166.15 o
       132    1  -1  -1   9    386.17    393.64     94.57 o
       133    2   9   1  -7    267.18    493.32    439.64 <
       133    1  -7   1   9    267.18    493.32    439.64 <
       134    1  -5   1   9   7685.92   7755.14    230.05 o
       135    1  -3   1   9   8641.67   8634.43    176.37 o
       136    2   7   5  -3    529.52    526.55     66.46 o
       136    1  -1   1   9    529.52    526.55     66.46 o
       137    1   1   1   9    660.29    720.81     92.02 o
       138    1  -5   3   9    229.17    222.38     86.91 <
       139    2   9   3  -3    308.37    329.73     71.57 o
       139    1  -3   3   9    308.37    329.73     71.57 o
       140    1  -1   3   9   7550.22   7527.65    153.37 o
       141    1   1   3   9   8339.15   8038.86    145.70 o
       142    2   7   7   1    133.81    232.60     86.91 <
       142    1   3   3   9    133.81    232.60     86.91 <
       143    1  -3   5   9    414.60    437.09     97.13 o
       144    1  -1   5   9   7660.77   7709.13    201.93 o
       145    2   9   5   1  13329.20  12844.30    235.16 o
       145    1   1   5   9  13329.20  12844.30    235.16 o
       146    1   3   5   9    230.66    181.48     99.69 <
       147    1  -4  -2  10   1926.98   1830.15    191.71 o
       148    2   6   6  -6   6003.91   5628.48    235.16 o
       148    1  -2  -2  10   6003.91   5628.48    235.16 o
       149    2   8   4  -6      4.66    -58.79     94.57 <
       149    1  -4   0  10      4.66    -58.79     94.57 <
       150    1  -2   0  10   2217.38   2111.32    122.69 o
       151    1   0   0  10      0.25     -5.11     89.46 <
       152    1  -4   2  10   1696.13   1564.32    268.39 o
       153    1  -2   2  10   3630.48   3532.50    166.15 o
       154    2   8   6  -2   4307.27   4613.72    155.92 o
       154    1   0   2  10   4307.27   4613.72    155.92 o
       155    1   2   2  10   3140.34   3164.42    212.15 o
       156    2  10   4  -2   3418.77   3650.08    265.83 o
       156    1  -2   4  10   3418.77   3650.08    265.83 o
       157    1   0   4  10      5.51   -109.91    112.47 <
       158    1   2   4  10   1417.81   1579.66    196.82 o
       159    1  -3  -1  11     33.03    -23.00    383.41 <
       160    2   7   7  -5   8350.41   9255.56    593.01 o
       160    1  -1  -1  11   8350.41   9255.56    593.01 o
       161    1  -1   1  11   4321.19   4879.55    350.18 o
       162    1   1   1  11   4378.84   6247.05   1017.32 o
       163    2  -1   1   1   1587.36   1566.88     25.56 o
       164    2   0   0   2      0.16      2.56     15.34 <
       165    2  -2   2   2   6795.49   6737.82     71.57 o
       166    2   0   2   2  10463.60  10382.80     81.79 o
       167    2  -1  -1   3  26323.80  25980.00    143.14 o
       168    2  -3   1   3    330.68    322.07     20.45 o
       169    2   1   1   3  26330.00  26258.60    148.25 o
       170    2  -1   3   3    359.77    355.30     30.67 o
       171    2   1   3   3    275.27    260.72     30.67 o
       172    2  -2   0   4      0.10      0.00     15.34 <
       173    2   0   0   4  33290.60  33285.20    186.59 o
       174    2  -4   2   4      0.24    -12.78     23.00 <
       175    2  -2   2   4   6259.69   6295.62     61.35 o
       176    2   2   2   4   5791.81   5694.94     86.91 o
       177    2  -4   4   4  11548.60  11065.30    184.04 o
       178    2   0   4   4  77047.80  77260.00    339.96 o
       179    2   2   4   4      0.43    -28.12     33.23 <
       180    2  -3  -3   5  11565.50  11113.80    161.03 o
       181    2  -3  -1   5    497.63    508.66     33.23 o
       182    2  -5   1   5    588.67    633.91     46.01 o
       183    2  -1   1   5  19080.30  19237.00    112.47 o
       184    2   1   1   5  18865.40  18500.90    150.81 o
       185    2  -3   3   5  11483.30  11714.50    120.14 o
       186    2  -1   3   5    420.50    393.64     30.67 o
       187    2   3   3   5  10217.30  10175.70    168.70 o
       188    2  -5   5   5   7986.40   8312.37    201.93 o
       189    2  -3   5   5   9414.43   9991.71    186.59 o
       190    2   1   5   5    794.04    690.14     71.57 o
       191    2   3   5   5   9125.16   9242.78    173.81 o
       192    2  -4  -4   6      0.37     28.12     61.35 <
       193    2  -2  -2   6   5378.29   5510.90    117.58 o
       194    2  -4   0   6      0.01     17.89     33.23 <
       195    2  -2   0   6   4276.49   4332.55     74.13 o
       196    2  -6   2   6   3593.28   3601.51    104.80 o
       197    2  -4   2   6   3270.12   3230.88     79.24 o
       198    2   0   2   6   3869.76   3972.14     69.01 o
       199    2   2   2   6   5028.61   5232.29    107.36 o
       200    2  -6   4   6   1789.40   1727.91     94.57 o
       201    2  -2   4   6   2998.38   3080.07     76.68 o
       202    2   0   4   6      0.00     17.89     33.23 <
       203    2   4   4   6     10.70    -28.12     58.79 <
       204    2  -4   6   6   1602.79   1564.32    138.03 o
       205    2  -2   6   6   3402.72   3529.94    150.81 o
       206    2   2   6   6   2908.69   2988.05    148.25 o
       207    2   4   6   6   1322.79   1531.09    130.36 o
       208    2  -5  -3   7     93.72     79.24     53.68 <
       209    2  -3  -3   7     52.73     74.13     58.79 <
       210    2  -5  -1   7   6467.90   6594.68    130.36 o
       211    2  -1  -1   7    188.56    166.15     51.12 o
       212    2  -7   1   7     33.67     35.79     61.35 <
       213    2  -3   1   7   7510.06   7496.98    125.25 o
       214    2  -1   1   7    145.74    148.25     40.90 o
       215    2  -5   3   7    111.48     86.91     56.23 <
       216    2  -3   3   7     50.14     92.02     43.45 <
       217    2   1   3   7   6847.76   6822.17    107.36 o
       218    2   3   3   7    108.32     74.13     69.01 <
       219    2  -7   5   7   3065.48   3123.53    260.72 o
       220    2  -5   5   7    115.32    189.15     69.01 <
       221    2  -1   5   7   5727.13   5712.83    115.02 o
       222    2   1   5   7   6066.20   6006.78    115.02 o
       223    2   5   5   7     79.79     25.56     86.91 <
       224    2  -3   7   7   3177.85   2903.70    230.05 o
       225    2  -1   7   7     71.64    -56.23     89.46 <
       226    2   3   7   7   3946.76   4726.19    332.29 o
       227    2   5   7   7   2473.29   2793.79    577.67 o
       228    2  -6  -4   8      0.35    -33.23     71.57 <
       229    2  -4  -2   8      0.74     61.35     51.12 <
       230    2  -2  -2   8   2392.18   2443.61    135.47 o
       231    2  -6   0   8      0.64    -33.23     56.23 <
       232    2  -4   0   8   5793.94   5863.64    132.92 o
       233    2   0   0   8  37137.00  36623.50    396.19 o
       234    2  -6   2   8   1491.99   1433.96    107.36 o
       235    2  -2   2   8   2294.68   2313.25     99.69 o
       236    2   0   2   8      1.11     23.00     43.45 <
       237    2  -4   4   8  21952.40  21005.80    263.28 o
       238    2  -2   4   8      2.54     -5.11     51.12 <
       239    2   2   4   8     16.53    -25.56     48.57 <
       240    2   4   4   8  21705.40  20469.10    337.40 o
       241    2  -4   6   8      0.34    -81.79     89.46 <
       242    2   0   6   8      9.05     15.34     56.23 <
       243    2   2   6   8   1175.54   1203.91     99.69 o
       244    2   0   8   8  14481.90  15584.40    994.31 o
       245    2  -5  -3   9    179.43    242.83     99.69 <
       246    2  -3  -1   9   5584.52   5403.55    135.47 o
       247    2  -1  -1   9    252.13    273.50     84.35 o
       248    2  -5   1   9   5017.99   5012.47    171.26 o
       249    2  -3   1   9   5641.98   5723.06    135.47 o
       250    2   1   1   9    431.09    454.98     84.35 o
       251    2  -5   3   9    149.62    112.47     94.57 <
       252    2  -1   3   9   4929.40   4951.12    150.81 o
       253    2   1   3   9   5444.47   5321.75    135.47 o
       254    2  -3   5   9    270.68    291.39     99.69 <
       255    2  -1   5   9   5001.57   4861.66    173.81 o
       256    2   3   5   9    150.60    -23.00     97.13 <
       257    2  -4  -2  10   1258.09    925.30    296.51 o
       258    2  -2   0  10   1447.69   1370.06    102.24 o
       259    2   0   0  10      0.17     20.45     79.24 <
       260    2  -4   2  10   1107.37   1117.01    155.92 o
       261    2  -2   2  10   2370.27   2397.60    135.47 o
       262    2   2   2  10   2050.26   1901.72    168.70 o
       263    2   0   4  10      3.60    -81.79     97.13 <
       264    2   2   4  10    925.66   1157.90    222.38 o
       265    2  -1   1  11   2821.22   2850.03    242.83 o
       266    2   1   1  11   2858.86   3164.42    426.86 o

#=======================================================================
data_magnetite_seed
#=======================================================================

# 1. CHEMICAL DATA

_chemical_name_mineral                   magnetite
_chemical_formula_sum                    'Fe2.854 O4'
_chemical_formula_weight                 223.4
_chemical_compound_source                'Harts Range, Australia'

#=======================================================================

# 2. CRYSTAL DATA

_space_group_crystal_system              cubic
_space_group_name_H-M_alt                'F d -3 m'
_space_group_name_Hall                   '-F 4abvw;2abvw;3'
_space_group_IT_number                   227

loop_
 _space_group_symop_id
 _space_group_symop_operation_xyz
 1   x,y,z
 2   -x+3/4,-y+1/4,z+1/2
 3   -x+1/4,y+1/2,-z+3/4
 4   x+1/2,-y+3/4,-z+1/4
 5   z,x,y
 6   z+1/2,-x+3/4,-y+1/4
 7   -z+3/4,-x+1/4,y+1/2
 8   -z+1/4,x+1/2,-y+3/4
 9   y,z,x
 10  -y+1/4,z+1/2,-x+3/4
 11  y+1/2,-z+3/4,-x+1/4
 12  -y+3/4,-z+1/4,x+1/2
 13  y+3/4,x+1/4,-z+1/2
 14  -y,-x,-z
 15  y+1/4,-x+1/2,z+3/4
 16  -y+1/2,x+3/4,z+1/4
 17  x+3/4,z+1/4,-y+1/2
 18  -x+1/2,z+3/4,y+1/4
 19  -x,-z,-y
 20  x+1/4,-z+1/2,y+3/4
 21  z+3/4,y+1/4,-x+1/2
 22  z+1/4,-y+1/2,x+3/4
 23  -z+1/2,y+3/4,x+1/4
 24  -z,-y,-x
 25  -x,-y,-z
 26  x+1/4,y+3/4,-z+1/2
 27  x+3/4,-y+1/2,z+1/4
 28  -x+1/2,y+1/4,z+3/4
 29  -z,-x,-y
 30  -z+1/2,x+1/4,y+3/4
 31  z+1/4,x+3/4,-y+1/2
 32  z+3/4,-x+1/2,y+1/4
 33  -y,-z,-x
 34  y+3/4,-z+1/2,x+1/4
 35  -y+1/2,z+1/4,x+3/4
 36  y+1/4,z+3/4,-x+1/2
 37  -y+1/4,-x+3/4,z+1/2
 38  y,x,z
 39  -y+3/4,x+1/2,-z+1/4
 40  y+1/2,-x+1/4,-z+3/4
 41  -x+1/4,-z+3/4,y+1/2
 42  x+1/2,-z+1/4,-y+3/4
 43  x,z,y
 44  -x+3/4,z+1/2,-y+1/4
 45  -z+1/4,-y+3/4,x+1/2
 46  -z+3/4,y+1/2,-x+1/4
 47  z+1/2,-y+1/4,-x+3/4
 48  z,y,x
 49  x,y+1/2,z+1/2
 50  -x+3/4,-y+3/4,z
 51  -x+1/4,y,-z+1/4
 52  x+1/2,-y+1/4,-z+3/4
 53  z,x+1/2,y+1/2
 54  z+1/2,-x+1/4,-y+3/4
 55  -z+3/4,-x+3/4,y
 56  -z+1/4,x,-y+1/4
 57  y,z+1/2,x+1/2
 58  -y+1/4,z,-x+1/4
 59  y+1/2,-z+1/4,-x+3/4
 60  -y+3/4,-z+3/4,x
 61  y+3/4,x+3/4,-z
 62  -y,-x+1/2,-z+1/2
 63  y+1/4,-x,z+1/4
 64  -y+1/2,x+1/4,z+3/4
 65  x+3/4,z+3/4,-y
 66  -x+1/2,z+1/4,y+3/4
 67  -x,-z+1/2,-y+1/2
 68  x+1/4,-z,y+1/4
 69  z+3/4,y+3/4,-x
 70  z+1/4,-y,x+1/4
 71  -z+1/2,y+1/4,x+3/4
 72  -z,-y+1/2,-x+1/2
 73  -x,-y+1/2,-z+1/2
 74  x+1/4,y+1/4,-z
 75  x+3/4,-y,z+3/4
 76  -x+1/2,y+3/4,z+1/4
 77  -z,-x+1/2,-y+1/2
 78  -z+1/2,x+3/4,y+1/4
 79  z+1/4,x+1/4,-y
 80  z+3/4,-x,y+3/4
 81  -y,-z+1/2,-x+1/2
 82  y+3/4,-z,x+3/4
 83  -y+1/2,z+3/4,x+1/4
 84  y+1/4,z+1/4,-x
 85  -y+1/4,-x+1/4,z
 86  y,x+1/2,z+1/2
 87  -y+3/4,x,-z+3/4
 88  y+1/2,-x+3/4,-z+1/4
 89  -x+1/4,-z+1/4,y
 90  x+1/2,-z+3/4,-y+1/4
 91  x,z+1/2,y+1/2
 92  -x+3/4,z,-y+3/4
 93  -z+1/4,-y+1/4,x
 94  -z+3/4,y,-x+3/4
 95  z+1/2,-y+3/4,-x+1/4
 96  z,y+1/2,x+1/2
 97  x+1/2,y,z+1/2
 98  -x+1/4,-y+1/4,z
 99  -x+3/4,y+1/2,-z+1/4
 100 x,-y+3/4,-z+3/4
 101 z+1/2,x,y+1/2
 102 z,-x+3/4,-y+3/4
 103 -z+1/4,-x+1/4,y
 104 -z+3/4,x+1/2,-y+1/4
 105 y+1/2,z,x+1/2
 106 -y+3/4,z+1/2,-x+1/4
 107 y,-z+3/4,-x+3/4
 108 -y+1/4,-z+1/4,x
 109 y+1/4,x+1/4,-z
 110 -y+1/2,-x,-z+1/2
 111 y+3/4,-x+1/2,z+1/4
 112 -y,x+3/4,z+3/4
 113 x+1/4,z+1/4,-y
 114 -x,z+3/4,y+3/4
 115 -x+1/2,-z,-y+1/2
 116 x+3/4,-z+1/2,y+1/4
 117 z+1/4,y+1/4,-x
 118 z+3/4,-y+1/2,x+1/4
 119 -z,y+3/4,x+3/4
 120 -z+1/2,-y,-x+1/2
 121 -x+1/2,-y,-z+1/2
 122 x+3/4,y+3/4,-z
 123 x+1/4,-y+1/2,z+3/4
 124 -x,y+1/4,z+1/4
 125 -z+1/2,-x,-y+1/2
 126 -z,x+1/4,y+1/4
 127 z+3/4,x+3/4,-y
 128 z+1/4,-x+1/2,y+3/4
 129 -y+1/2,-z,-x+1/2
 130 y+1/4,-z+1/2,x+3/4
 131 -y,z+1/4,x+1/4
 132 y+3/4,z+3/4,-x
 133 -y+3/4,-x+3/4,z
 134 y+1/2,x,z+1/2
 135 -y+1/4,x+1/2,-z+3/4
 136 y,-x+1/4,-z+1/4
 137 -x+3/4,-z+3/4,y
 138 x,-z+1/4,-y+1/4
 139 x+1/2,z,y+1/2
 140 -x+1/4,z+1/2,-y+3/4
 141 -z+3/4,-y+3/4,x
 142 -z+1/4,y+1/2,-x+3/4
 143 z,-y+1/4,-x+1/4
 144 z+1/2,y,x+1/2
 145 x+1/2,y+1/2,z
 146 -x+1/4,-y+3/4,z+1/2
 147 -x+3/4,y,-z+3/4
 148 x,-y+1/4,-z+1/4
 149 z+1/2,x+1/2,y
 150 z,-x+1/4,-y+1/4
 151 -z+1/4,-x+3/4,y+1/2
 152 -z+3/4,x,-y+3/4
 153 y+1/2,z+1/2,x
 154 -y+3/4,z,-x+3/4
 155 y,-z+1/4,-x+1/4
 156 -y+1/4,-z+3/4,x+1/2
 157 y+1/4,x+3/4,-z+1/2
 158 -y+1/2,-x+1/2,-z
 159 y+3/4,-x,z+3/4
 160 -y,x+1/4,z+1/4
 161 x+1/4,z+3/4,-y+1/2
 162 -x,z+1/4,y+1/4
 163 -x+1/2,-z+1/2,-y
 164 x+3/4,-z,y+3/4
 165 z+1/4,y+3/4,-x+1/2
 166 z+3/4,-y,x+3/4
 167 -z,y+1/4,x+1/4
 168 -z+1/2,-y+1/2,-x
 169 -x+1/2,-y+1/2,-z
 170 x+3/4,y+1/4,-z+1/2
 171 x+1/4,-y,z+1/4
 172 -x,y+3/4,z+3/4
 173 -z+1/2,-x+1/2,-y
 174 -z,x+3/4,y+3/4
 175 z+3/4,x+1/4,-y+1/2
 176 z+1/4,-x,y+1/4
 177 -y+1/2,-z+1/2,-x
 178 y+1/4,-z,x+1/4
 179 -y,z+3/4,x+3/4
 180 y+3/4,z+1/4,-x+1/2
 181 -y+3/4,-x+1/4,z+1/2
 182 y+1/2,x+1/2,z
 183 -y+1/4,x,-z+1/4
 184 y,-x+3/4,-z+3/4
 185 -x+3/4,-z+1/4,y+1/2
 186 x,-z+3/4,-y+3/4
 187 x+1/2,z+1/2,y
 188 -x+1/4,z,-y+1/4
 189 -z+3/4,-y+1/4,x+1/2
 190 -z+1/4,y,-x+1/4
 191 z,-y+3/4,-x+3/4
 192 z+1/2,y+1/2,x

_cell_length_a                           8.4075(9)
_cell_length_b                           8.4075(9)
_cell_length_c                           8.4075(9)
_cell_angle_alpha                        90
_cell_angle_beta                         90
_cell_angle_gamma                        90
_cell_volume                             594.29(11)
_cell_formula_units_Z                    8
_cell_measurement_reflns_used            2033
_cell_measurement_theta_min              4.21
_cell_measurement_theta_max              29.62
_cell_measurement_temperature            100
_exptl_crystal_description               block
_exptl_crystal_density_diffrn            4.9933
_exptl_crystal_F_000                     846
_exptl_absorpt_coefficient_mu            13.583

#=======================================================================

# 3. EXPERIMENTAL DATA

_diffrn_ambient_temperature              100
_diffrn_source                           'Mo microfocus Rotating Anode'
_diffrn_source_power                     2.5
_diffrn_source_voltage                   50
_diffrn_source_current                   50
_diffrn_radiation_type                   'Mo K\a'
_diffrn_radiation_wavelength             0.71073
_diffrn_radiation_monochromator          graphite
_diffrn_measurement_device               'four-circle diffractometer'
_diffrn_measurement_device_type          'Bruker CCD'
_diffrn_detector                         'APEX II'
_diffrn_detector_area_resol_mean         16.67
_diffrn_measurement_method               '6\w scans'
_diffrn_measurement_specimen_support     'MiTeGen MicroMount 50'
_diffrn_reflns_number                    2033
_diffrn_reflns_theta_min                 4.21
_diffrn_reflns_theta_max                 29.62
_diffrn_reflns_theta_full                29.62
_diffrn_measured_fraction_theta_max      1
_diffrn_measured_fraction_theta_full     1
_diffrn_reflns_av_R_equivalents          0.2203
_diffrn_reflns_av_unetI/netI             0.0161
_diffrn_reflns_limit_h_min               -11
_diffrn_reflns_limit_h_max               10
_diffrn_reflns_limit_k_min               -11
_diffrn_reflns_limit_k_max               11
_diffrn_reflns_limit_l_min               -11
_diffrn_reflns_limit_l_max               10
_diffrn_radiation_probe                  X-ray

#=======================================================================

# 4. REFINEMENT DATA

_reflns_number_total                     58
_reflns_number_gt                        42
_reflns_threshold_expression             'I>3\s(I)'
_refine_ls_structure_factor_coef         Fsqd
_refine_ls_R_factor_gt                   0.0112
_refine_ls_wR_factor_gt                  0.0244
_refine_ls_R_factor_all                  0.0237
_refine_ls_wR_factor_ref                 0.0267
_refine_ls_goodness_of_fit_ref           0.90
_refine_ls_goodness_of_fit_gt            1.01
_refine_ls_number_reflns                 58
_refine_ls_number_parameters             9
_refine_ls_number_restraints             0
_refine_ls_number_constraints            0
_refine_ls_weighting_scheme              sigma
_refine_ls_weighting_details             'w=1/(\s^2^(I)+0.0004I^2^)'
_refine_ls_shift/su_max                  0.0217
_refine_ls_shift/su_mean                 0.0103
_refine_diff_density_max                 0.33
_refine_diff_density_min                 -0.21
_refine_ls_extinction_method             'none'

loop_
 _atom_type_symbol
 _atom_type_scat_dispersion_real
 _atom_type_scat_dispersion_imag
 _atom_type_scat_source
 Fe   0.3463  0.8444
 'International Tables Vol C tables 4.2.6.8 and 6.1.1.1'
 O    0.0106  0.0060
 'International Tables Vol C tables 4.2.6.8 and 6.1.1.1'

#=======================================================================

# 5. ATOMIC COORDINATES AND DISPLACEMENT PARAMETERS

loop_
 _atom_site_label
 _atom_site_type_symbol
 _atom_site_fract_x
 _atom_site_fract_y
 _atom_site_fract_z
 _atom_site_adp_type
 _atom_site_U_iso_or_equiv
 _atom_site_site_symmetry_multiplicity
 _atom_site_occupancy
 _atom_site_calc_flag
 _atom_site_refinement_flags
 _atom_site_disorder_assembly
 _atom_site_disorder_group
  Fe-oct Fe 0.5 0.5 0.5 Uani 0.01013(14) 16 0.952(8) d . . .
  Fe-tet Fe 0.125 0.125 0.125 Uani 0.00830(19) 8 0.949(8) d . . .
  O1 O 0.25483(17) 0.25483(17) 0.25483(17) Uani 0.0132(4) 32 1 d . . .

loop_
 _atom_site_aniso_label
 _atom_site_aniso_type_symbol
 _atom_site_aniso_U_11
 _atom_site_aniso_U_22
 _atom_site_aniso_U_33
 _atom_site_aniso_U_12
 _atom_site_aniso_U_13
 _atom_site_aniso_U_23
 Fe-oct Fe 0.0101(2) 0.0101(2) 0.0101(2) 0.0013(2) 0.0013(2) 0.0013(2)
 Fe-tet Fe 0.0083(3) 0.0083(3) 0.0083(3) 0 0 0
 O1 O 0.0132(7) 0.0132(7) 0.0132(7) 0.0004(9) 0.0004(9) 0.0004(9)

#=======================================================================

# 6. MOLECULAR GEOMETRY

loop_
 _geom_bond_atom_site_label_1
 _geom_bond_atom_site_label_2
 _geom_bond_site_symmetry_1
 _geom_bond_site_symmetry_2
 _geom_bond_distance
 _geom_bond_publ_flag
  Fe-oct O1 . 50_555 2.0621(15) n
  Fe-tet O1 . .      1.8906(14) n

loop_
 _geom_angle_atom_site_label_1
 _geom_angle_atom_site_label_2
 _geom_angle_atom_site_label_3
 _geom_angle_site_symmetry_1
 _geom_angle_site_symmetry_2
 _geom_angle_site_symmetry_3
 _geom_angle
 _geom_angle_publ_flag
  O1 Fe-oct O1 50_555 . 100_555 87.72(5)  n
  O1 Fe-oct O1 50_555 . 63_565  92.28(5)  n
  O1 Fe-tet O1      . . 51_555  109.47(6) n

#=======================================================================

# 7. STRUCTURE-FACTOR LIST

loop_
 _refln_index_h
 _refln_index_k
 _refln_index_l
 _refln_F_squared_calc
 _refln_F_squared_meas
 _refln_F_squared_sigma
 _refln_observed_status
   1   1   1   4087.93   4148.15     65.84 o
   0   2   2  26354.30  25881.60    141.82 o
   2   2   2  16757.90  16253.30    162.08 o
   1   1   3  65305.10  64643.30    157.01 o
   1   3   3    794.27    805.32     45.58 o
   3   3   3  36298.10  37652.50    288.70 o
   0   0   4  83214.80  80987.70    395.06 o
   2   2   4  15273.80  15346.60    101.30 o
   0   4   4 191642.00 187862.00    541.95 o
   2   4   4      0.66    -20.26     55.71 <
   4   4   4  27876.20  28069.70    349.48 o
   1   1   5  47010.70  46830.10    172.21 o
   1   3   5   1132.78   1149.73     45.58 o
   3   3   5  27384.30  27699.90    192.47 o
   1   5   5   1547.55   1565.05     86.10 o
   3   5   5  22255.30  22417.20    212.73 o
   5   5   5  19549.10  18973.10    405.19 o
   0   2   6   9969.78  10200.70    116.49 o
   2   2   6  12499.80  12930.70    141.82 o
   2   4   6   8052.79   8205.14    101.30 o
   4   4   6      0.54    -81.04     86.10 <
   0   6   6   6721.60   6827.48    243.12 o
   2   6   6   7927.27   8134.23    172.21 o
   4   6   6   3788.71   3712.57    172.21 o
   6   6   6   5218.29   5672.69    384.93 o
   1   1   7    332.50    334.28     70.91 o
   1   3   7  18077.70  18218.40    131.69 o
   3   3   7    144.98     35.45     91.17 <
   1   5   7  14577.70  14728.70    146.88 o
   3   5   7    160.51    172.21     75.97 <
   5   5   7    225.27    253.24    136.75 <
   1   7   7     74.84    268.44    146.88 <
   3   7   7   8273.23   8250.72    227.92 o
   5   7   7   6859.85   6204.50    298.83 o
   0   0   8  89620.10  88787.70    850.90 o
   2   2   8   5838.02   5956.32    162.08 o
   0   4   8  13512.90  13305.50    212.73 o
   2   4   8      1.92      5.06     81.04 <
   4   4   8  51586.10  52416.60    390.00 o
   2   6   8   3411.22   3342.83    136.75 o
   4   6   8      1.27    -25.32    106.36 <
   6   6   8   2846.06   2836.34   1068.69 <
   0   8   8  33436.10  35039.00   1053.50 o
   2   8   8      4.58    -10.13    374.80 <
   1   1   9    724.17    739.47    116.49 o
   1   3   9  12752.30  12971.20    157.01 o
   3   3   9    239.60    217.79    121.56 <
   1   5   9  11854.50  11699.90    177.27 o
   3   5   9    386.82    450.78    101.30 o
   5   5   9    647.41    886.36    359.61 <
   1   7   9    124.66     25.32    278.57 <
   0   2  10   3914.09   3844.26    192.47 o
   2   2  10   5211.13   4720.49    192.47 o
   2   4  10   2700.81   2583.10    136.75 o
   4   4  10      0.24    288.70    501.42 <
   0   6  10   1873.64   3322.57   1534.66 <
   1   1  11   6767.85   6462.81    288.70 o
   1   3  11     35.64    162.08    253.24 <
