# Supplementary material for: Iron oxide inclusions and exsolution textures of rainbow lattice sunstone
Source: Copernicus journal article supplement (doi:10.5194/ejm-34-183-2022), 2022-03-28
Supplement: Supplementary file 1 [file ejm-34-183-2022-supplement.zip › ejm-34-183-2022-supplement-title-page.pdf]

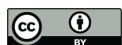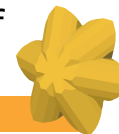

## *Supplement of*

# **Iron oxide inclusions and exsolution textures of rainbow lattice sunstone**

**Shiyun Jin et al.**

*Correspondence to:* Shiyun Jin (sjin@gia.edu)

- ejm-34-183-2022-supplement-title-page.pdf
- all.cif
- supplementary material.pdf

The copyright of individual parts of the supplement might differ from the article licence.
